# Supplementary material for: A model β-sheet interaction and thermodynamic analysis of β-strand mimetics
Source: Royal Society of Chemistry journal article supplement (doi:10.1039/c5ob00886g), 2015-01-01

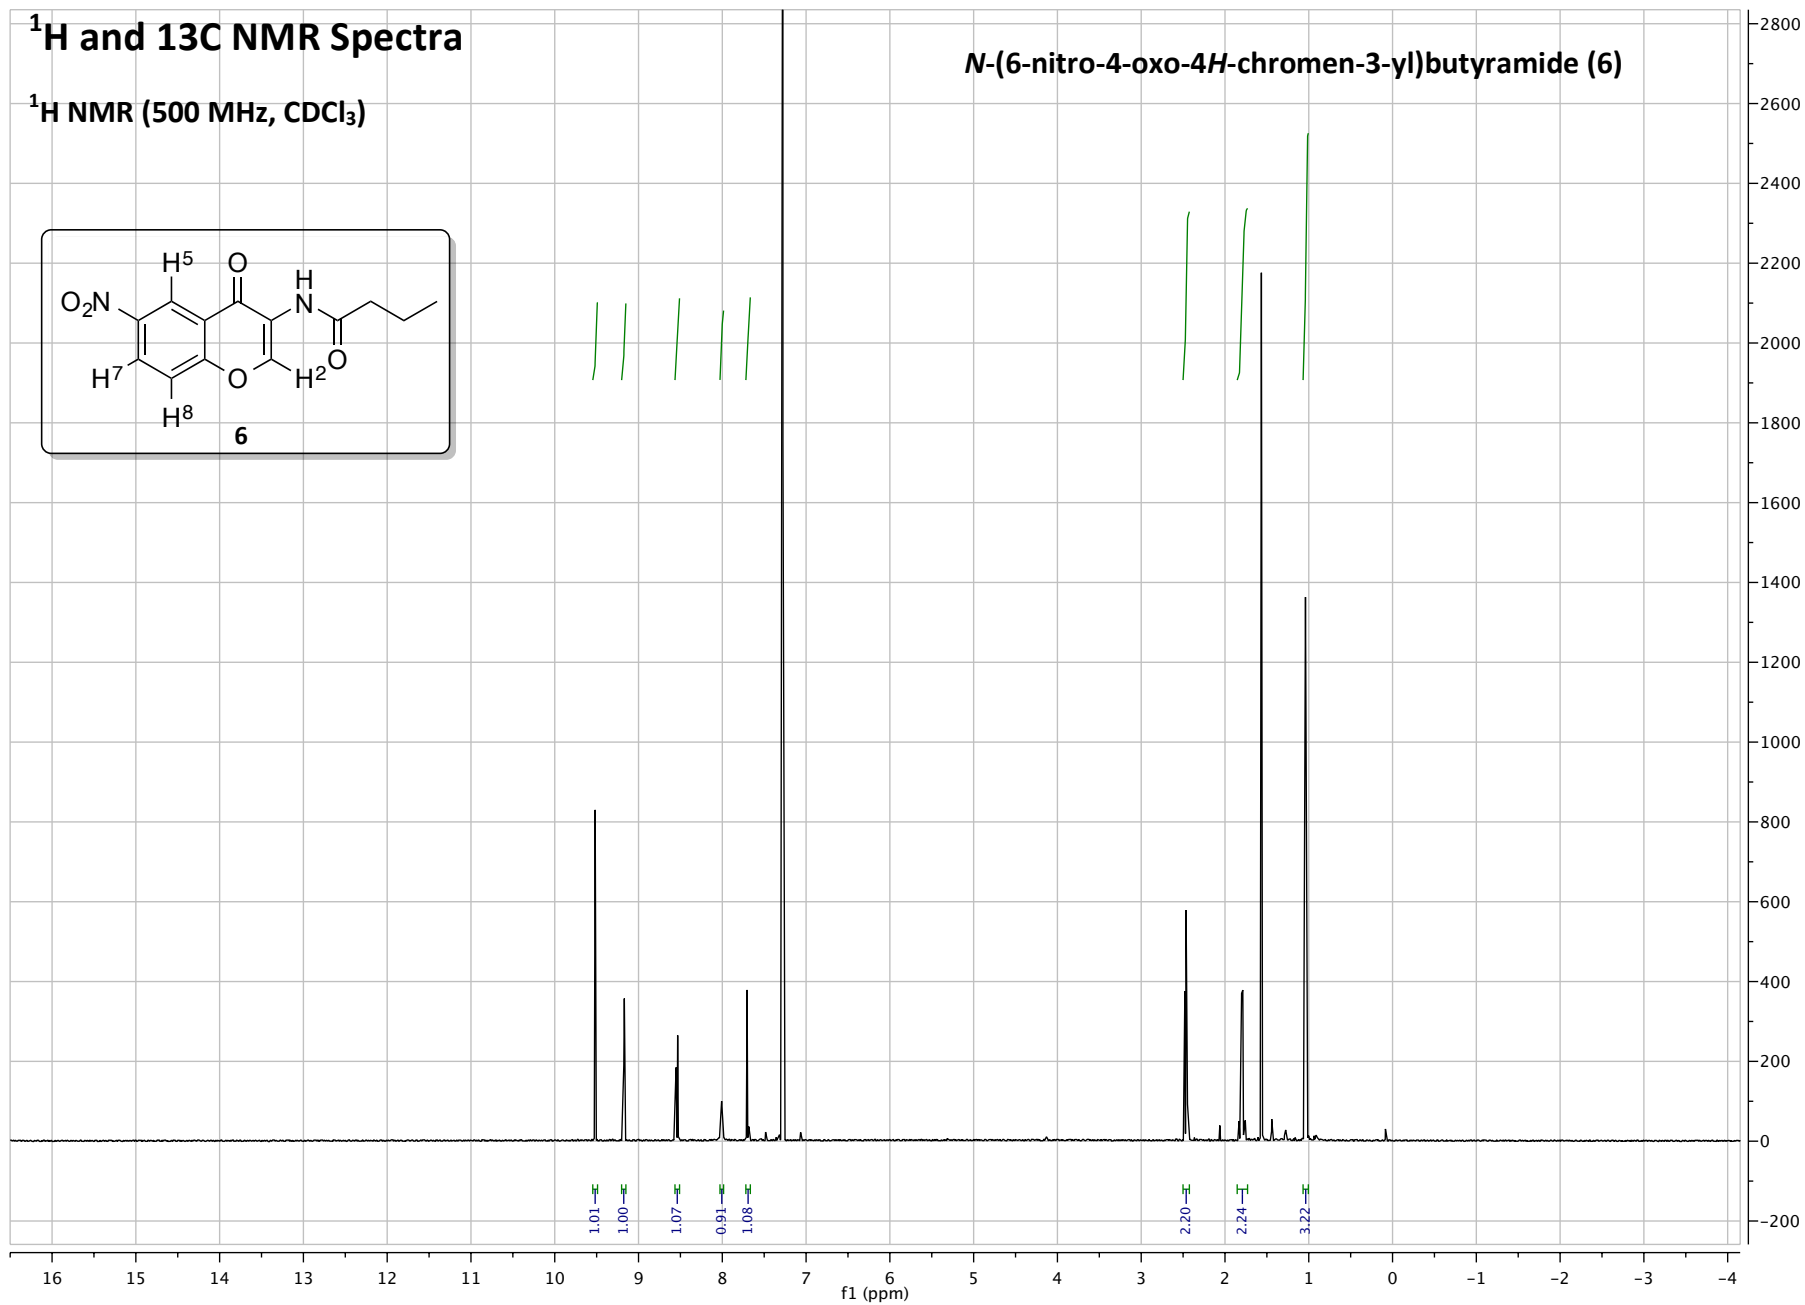

<sup>13</sup>C NMR (126 MHz, CDCl<sub>3</sub>)

*N*-(6-nitro-4-oxo-4*H*-chromen-3-yl)butyramide (6)

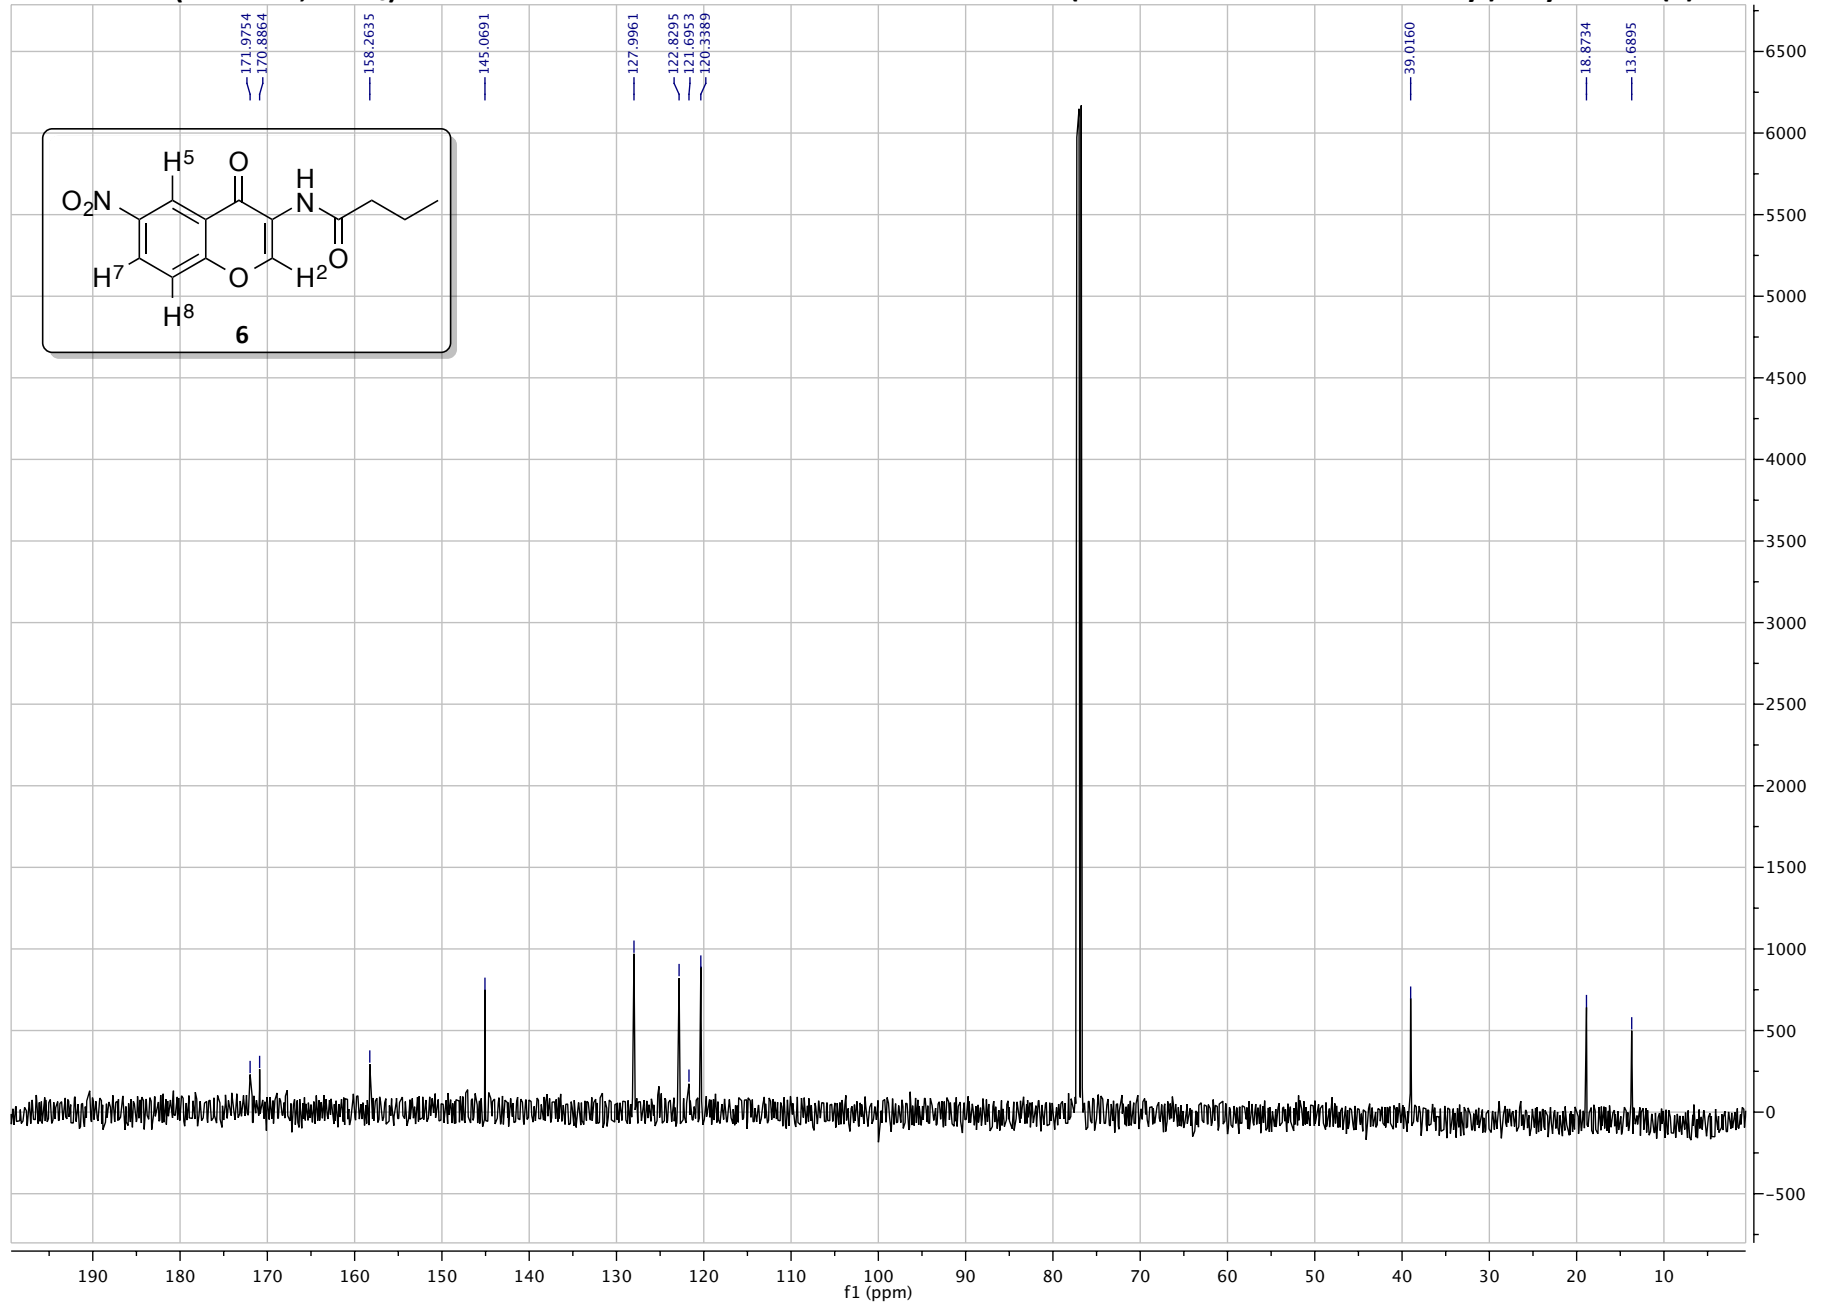

<sup>1</sup>H NMR (500 MHz, CDCl<sub>3</sub>)

*N*-(6-amino-4-oxo-4*H*-chromen-3-yl)butyramide (7)

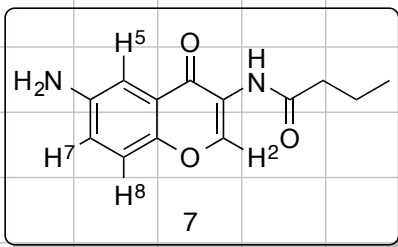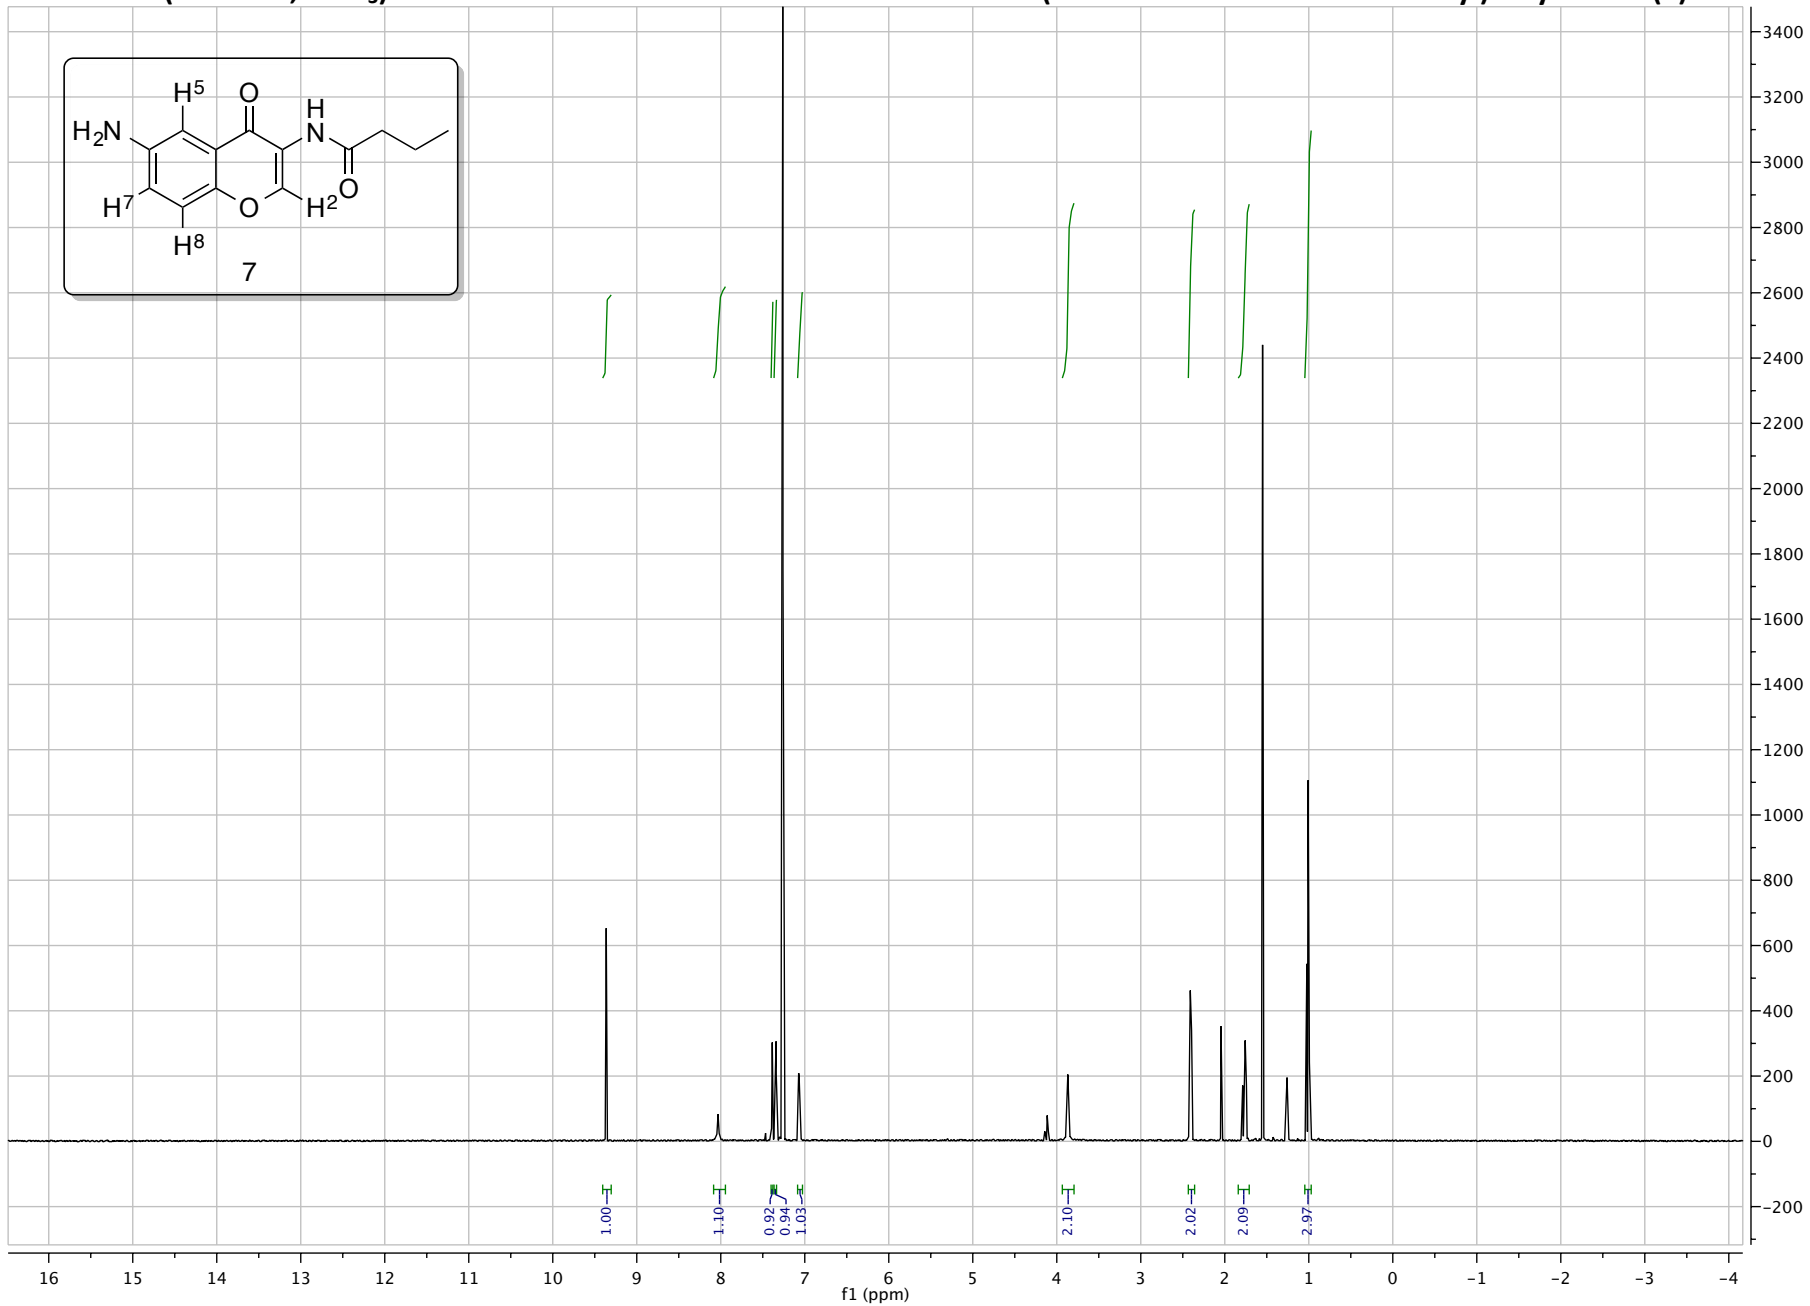

<sup>13</sup>C NMR (126 MHz, CDCl<sub>3</sub>)

*N*-(6-amino-4-oxo-4*H*-chromen-3-yl)butyramide (7)

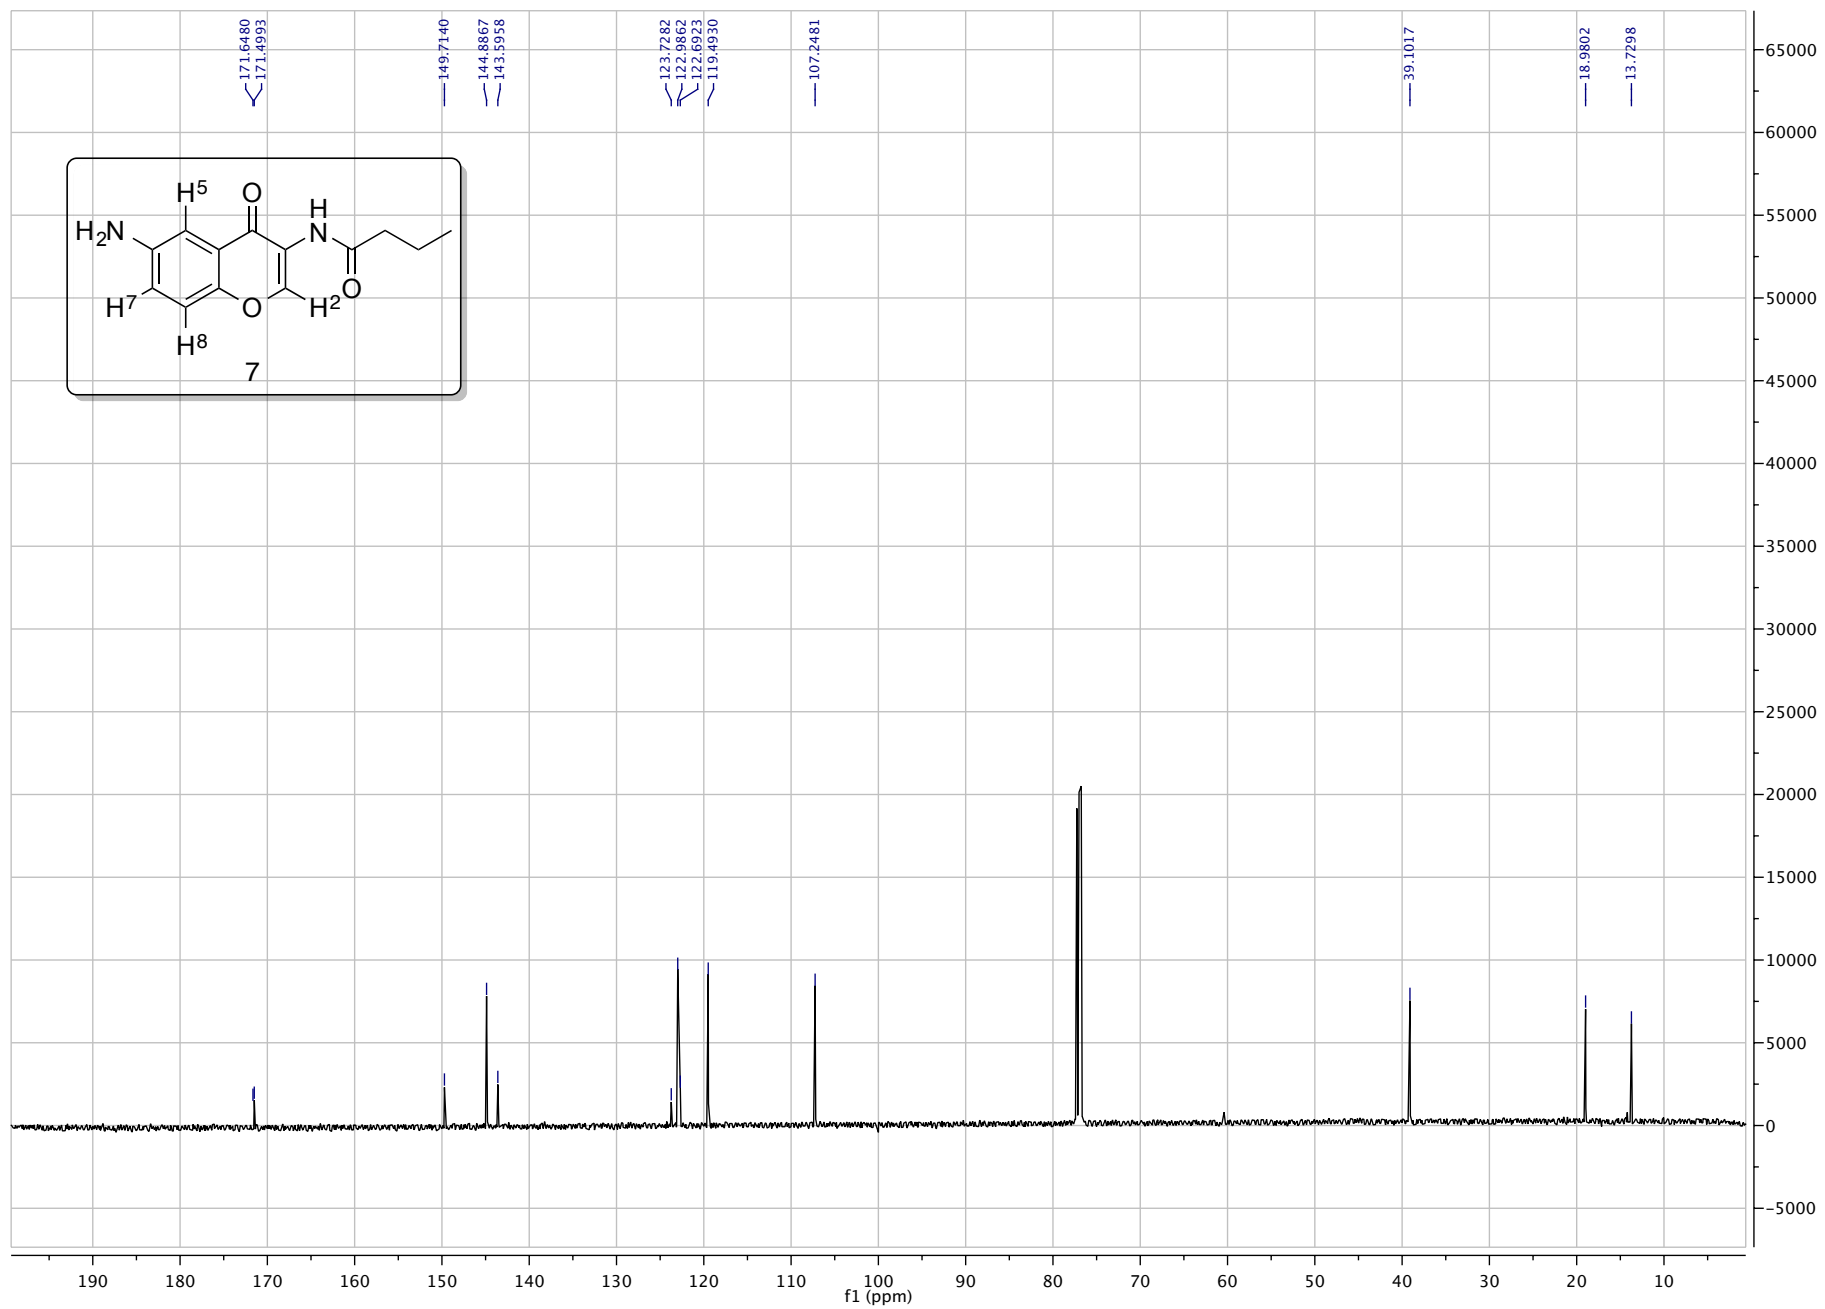

<sup>1</sup>H NMR (500 MHz, CDCl<sub>3</sub>)

*N*-(4-oxo-6-(2-oxo-2-(piperidin-1-yl)acetamido)-  
4*H*-chromen-3-yl)butyramide (1)

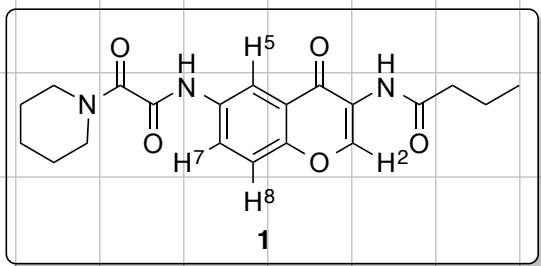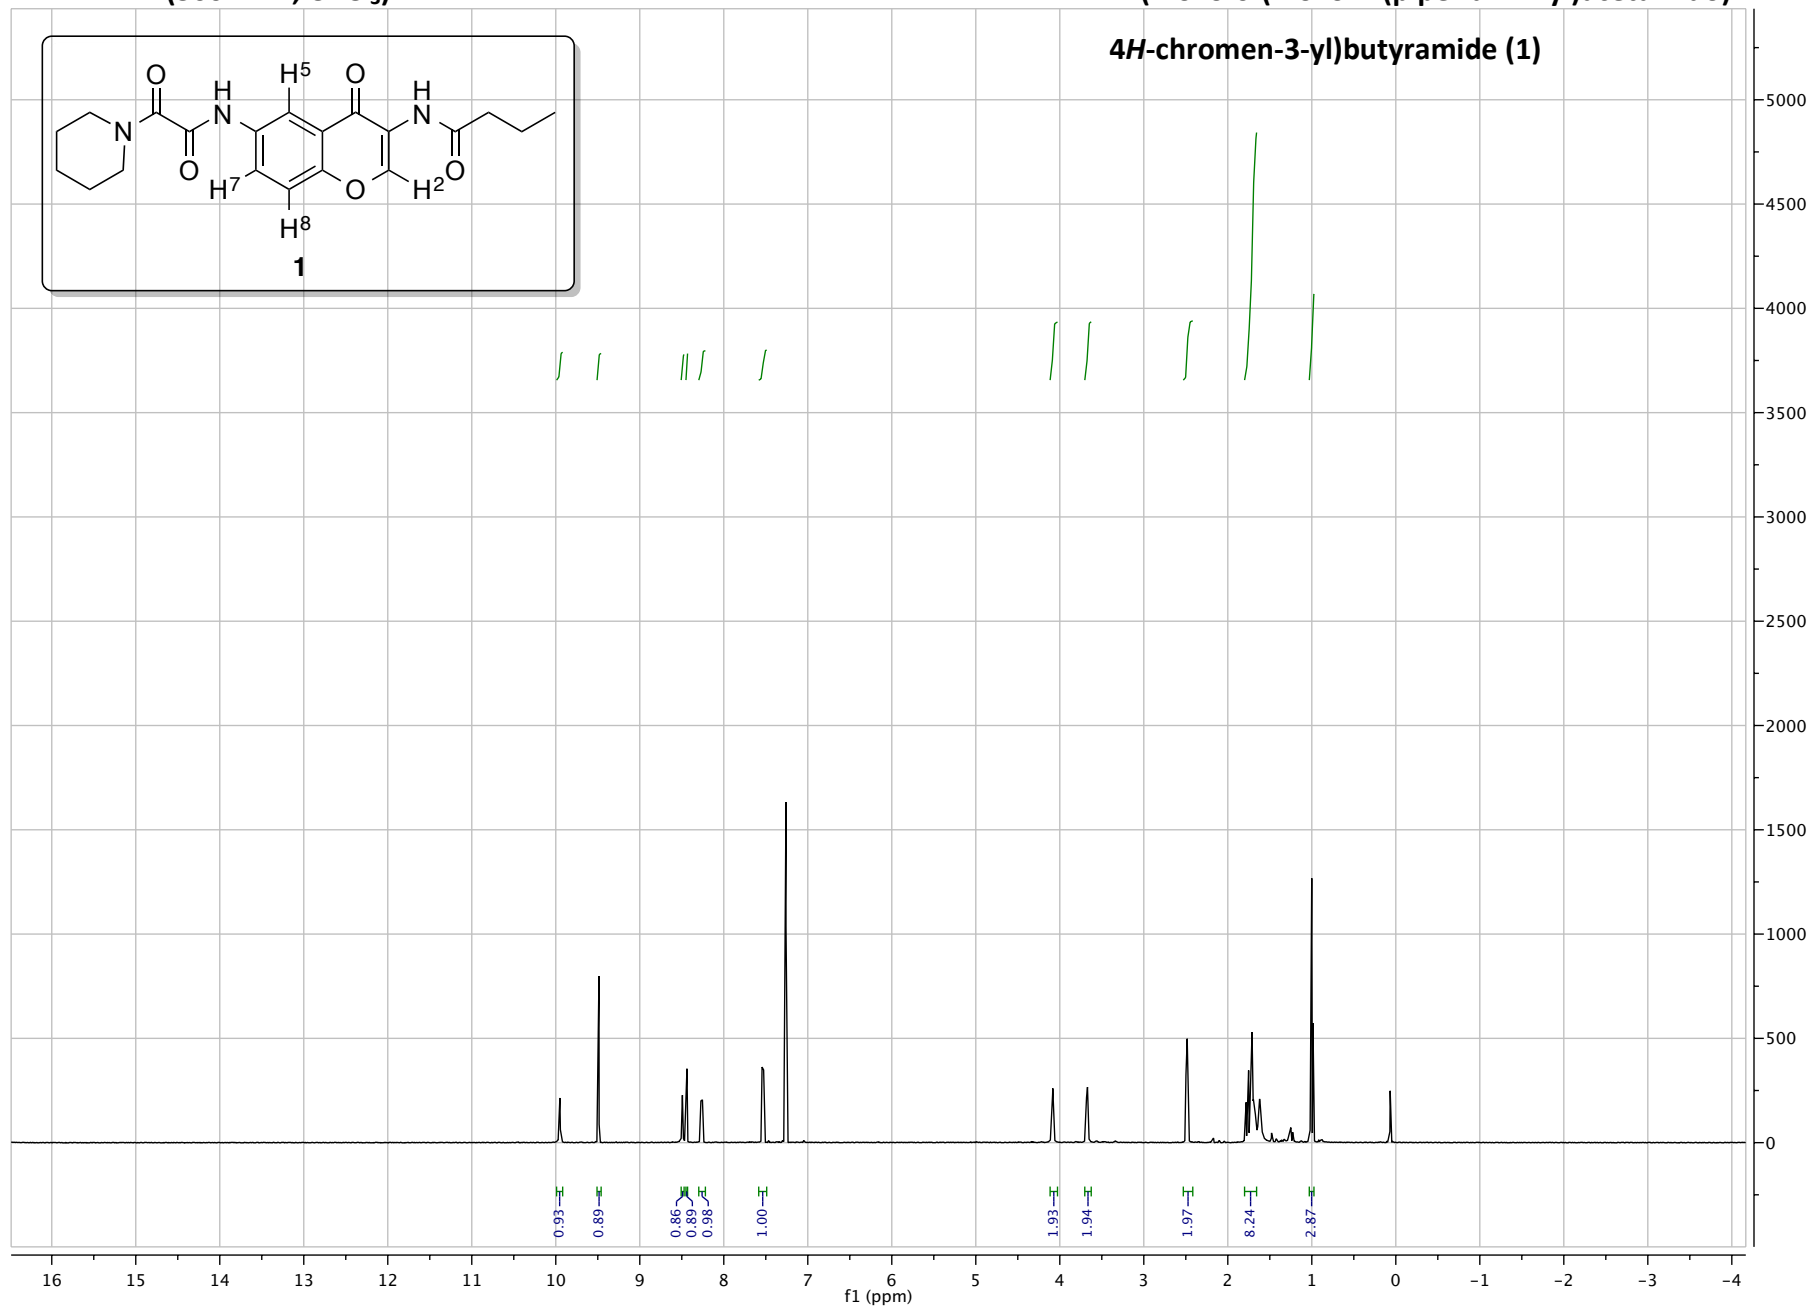

<sup>13</sup>C NMR (126 MHz, CDCl<sub>3</sub>)

*N*-(4-oxo-6-(2-oxo-2-(piperidin-1-yl)acetamido)-  
4*H*-chromen-3-yl)butyramide (1)

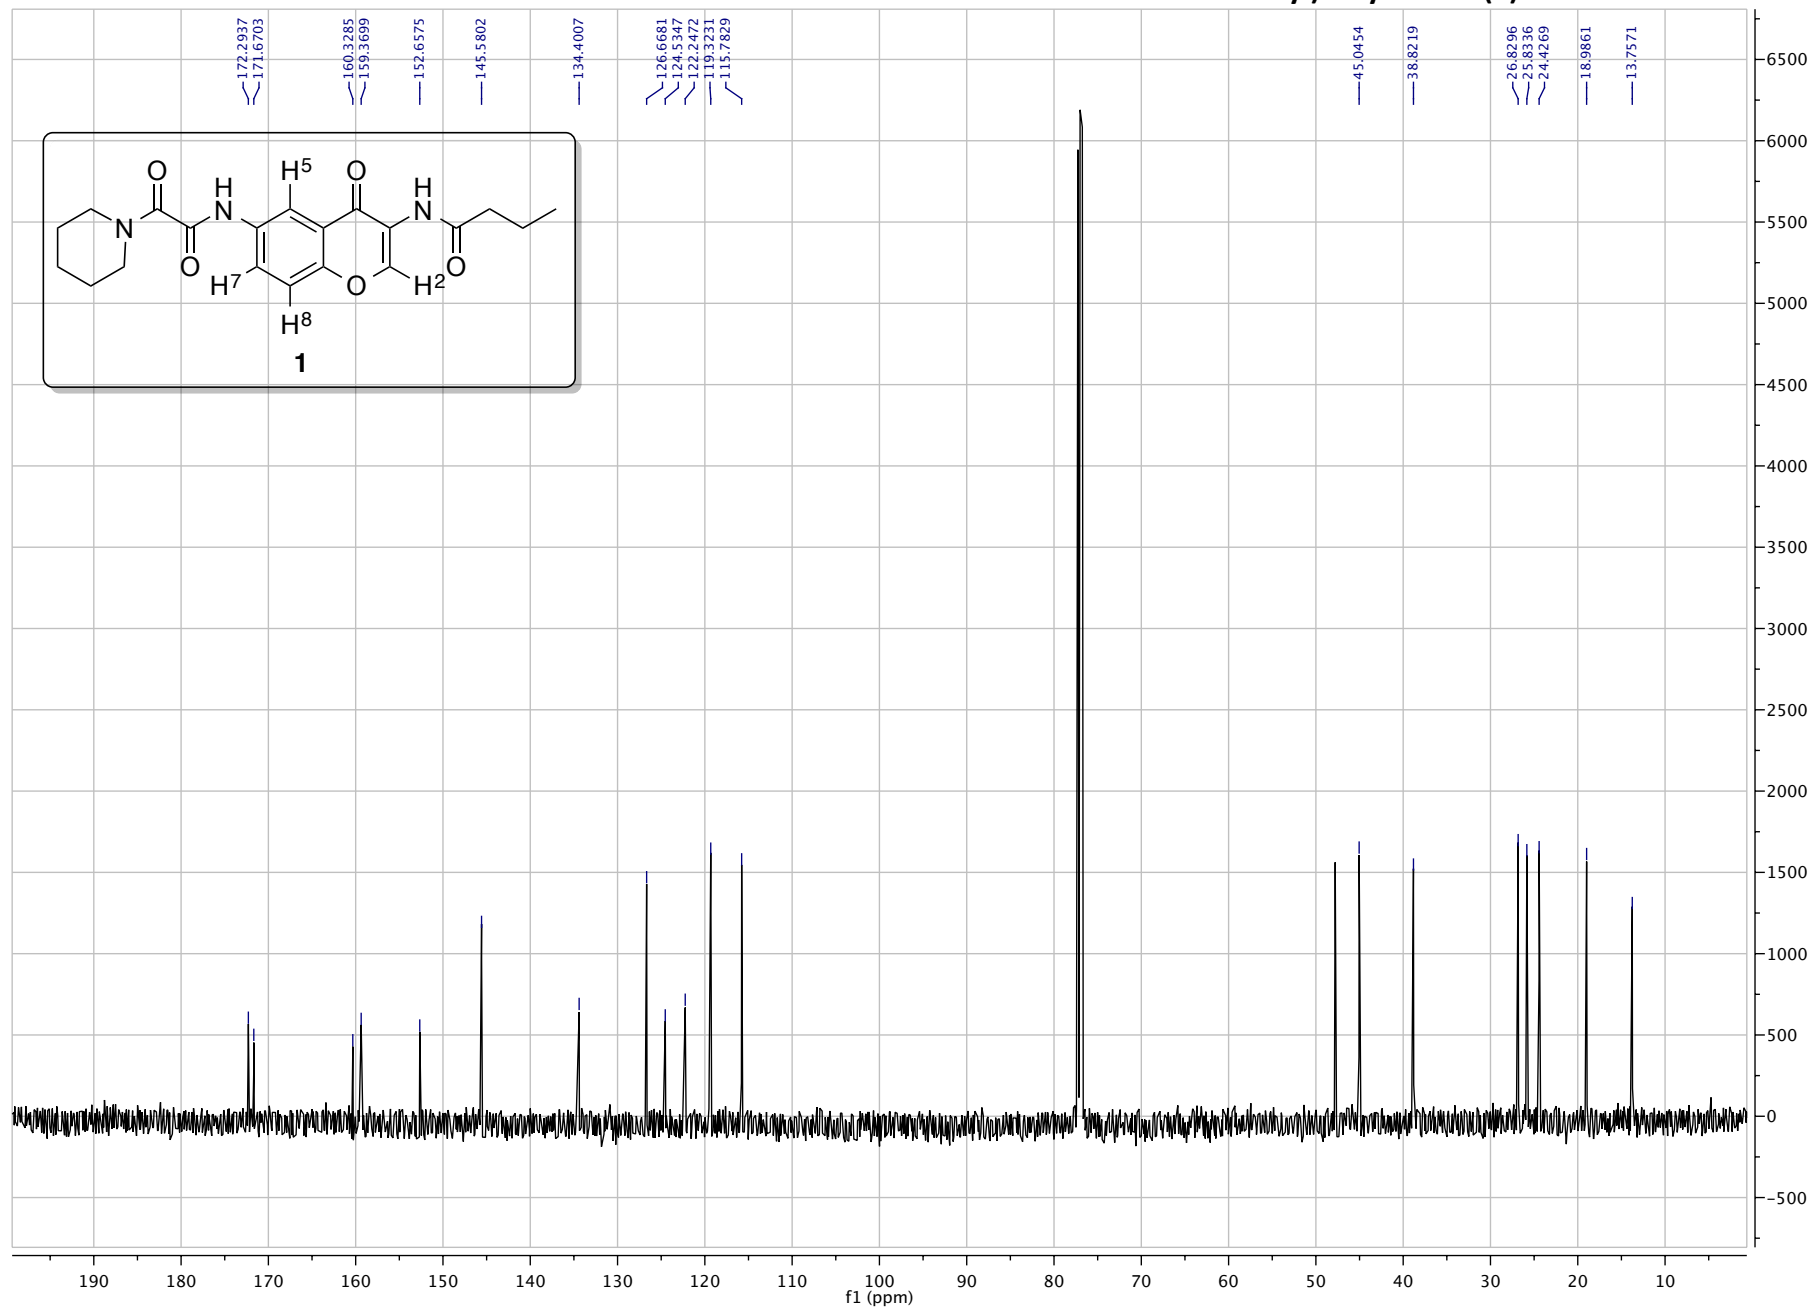

<sup>1</sup>H NMR (500 MHz, CDCl<sub>3</sub>)

*N*-(3-(2-isobutylhydrazinecarbonyl)-4-

methoxyphenyl)-2-oxo-2-(piperidin-1-yl)acetamide (**2**)

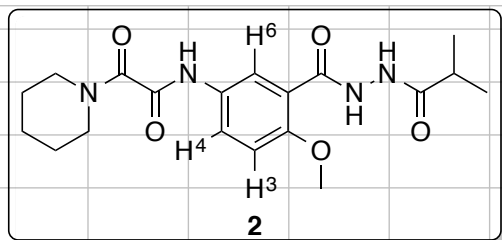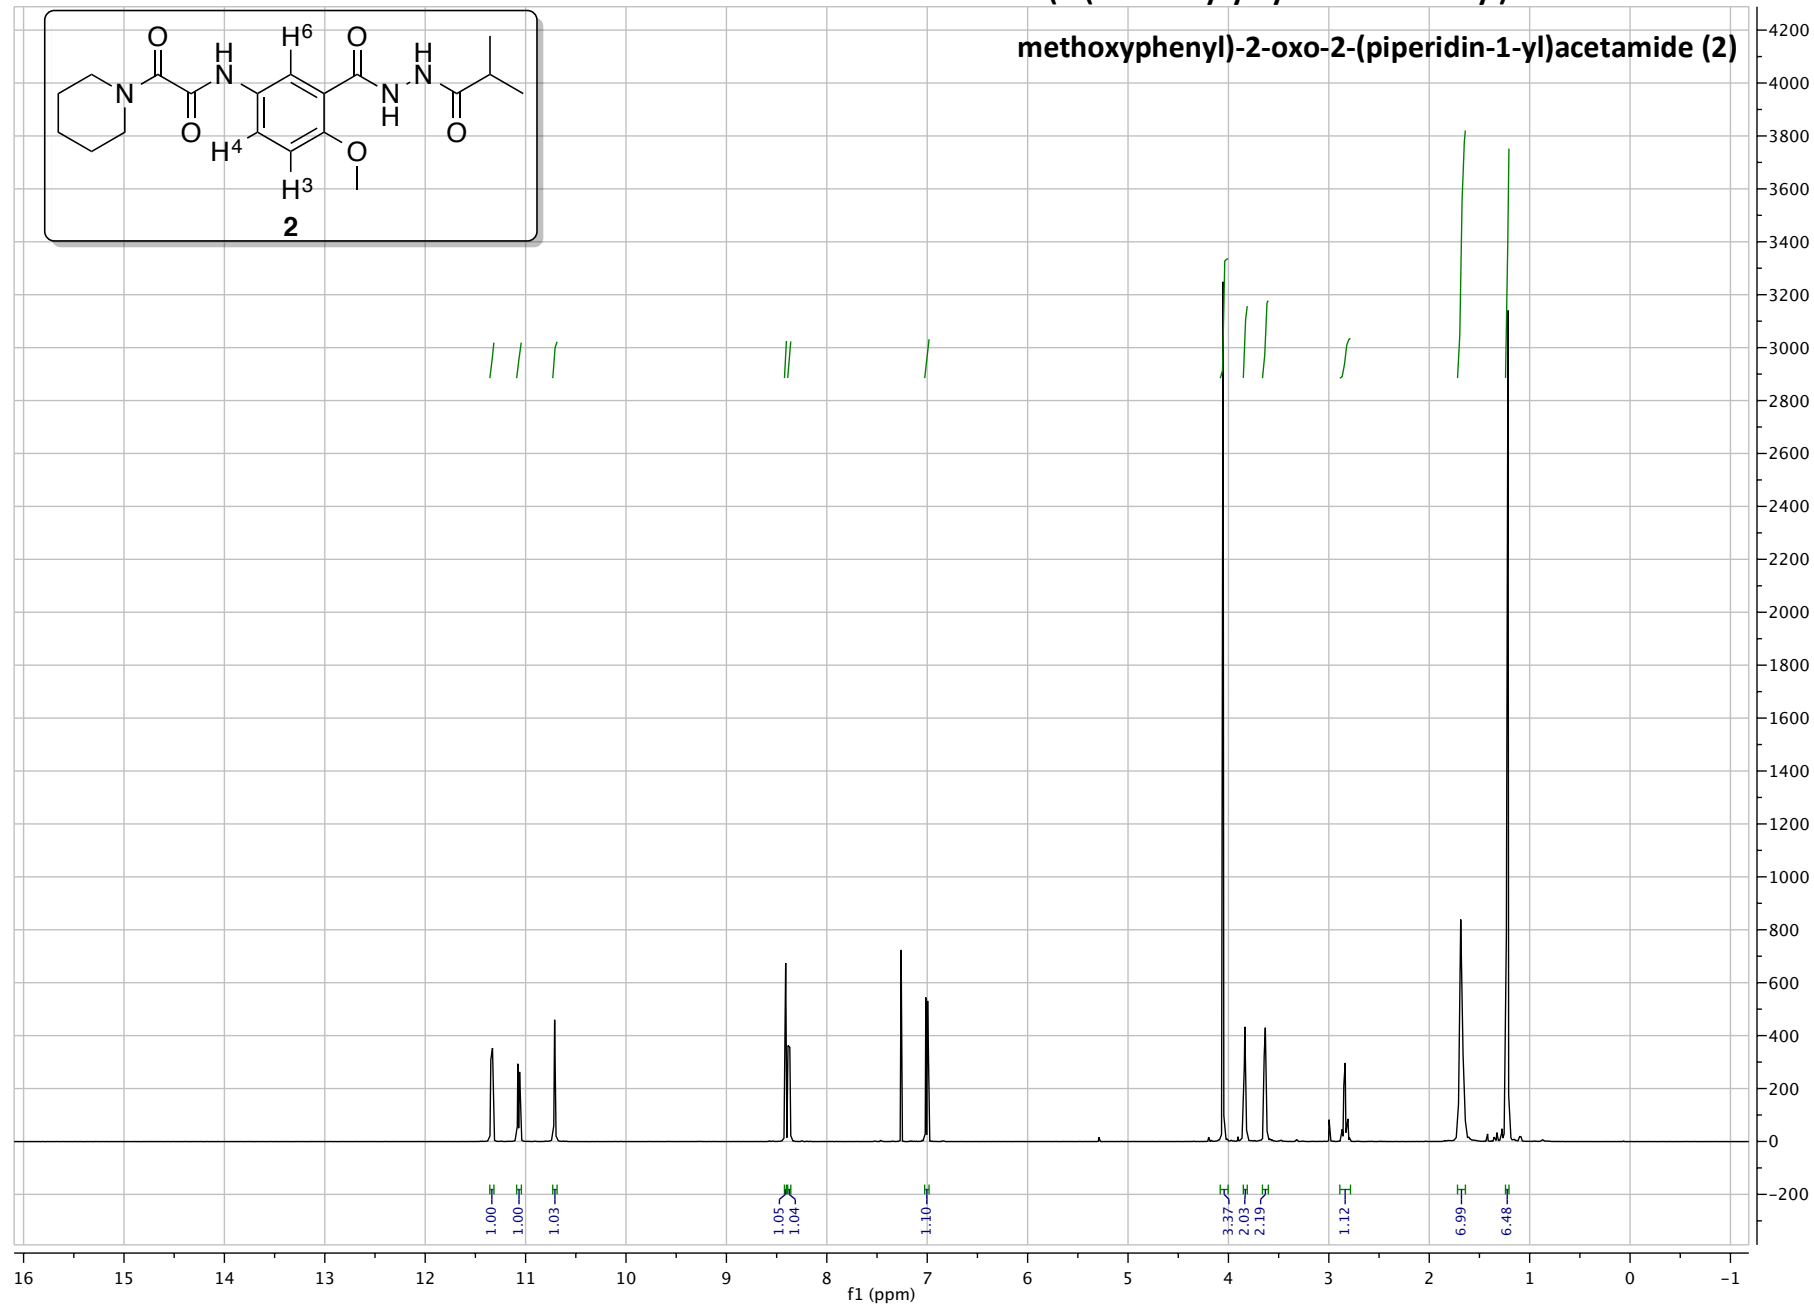

<sup>13</sup>C NMR (126 MHz, CDCl<sub>3</sub>)

***N*-(3-(2-isobutyrylhydrazinecarbonyl)-4-methoxyphenyl)-2-oxo-2-(piperidin-1-yl)acetamide (2)**

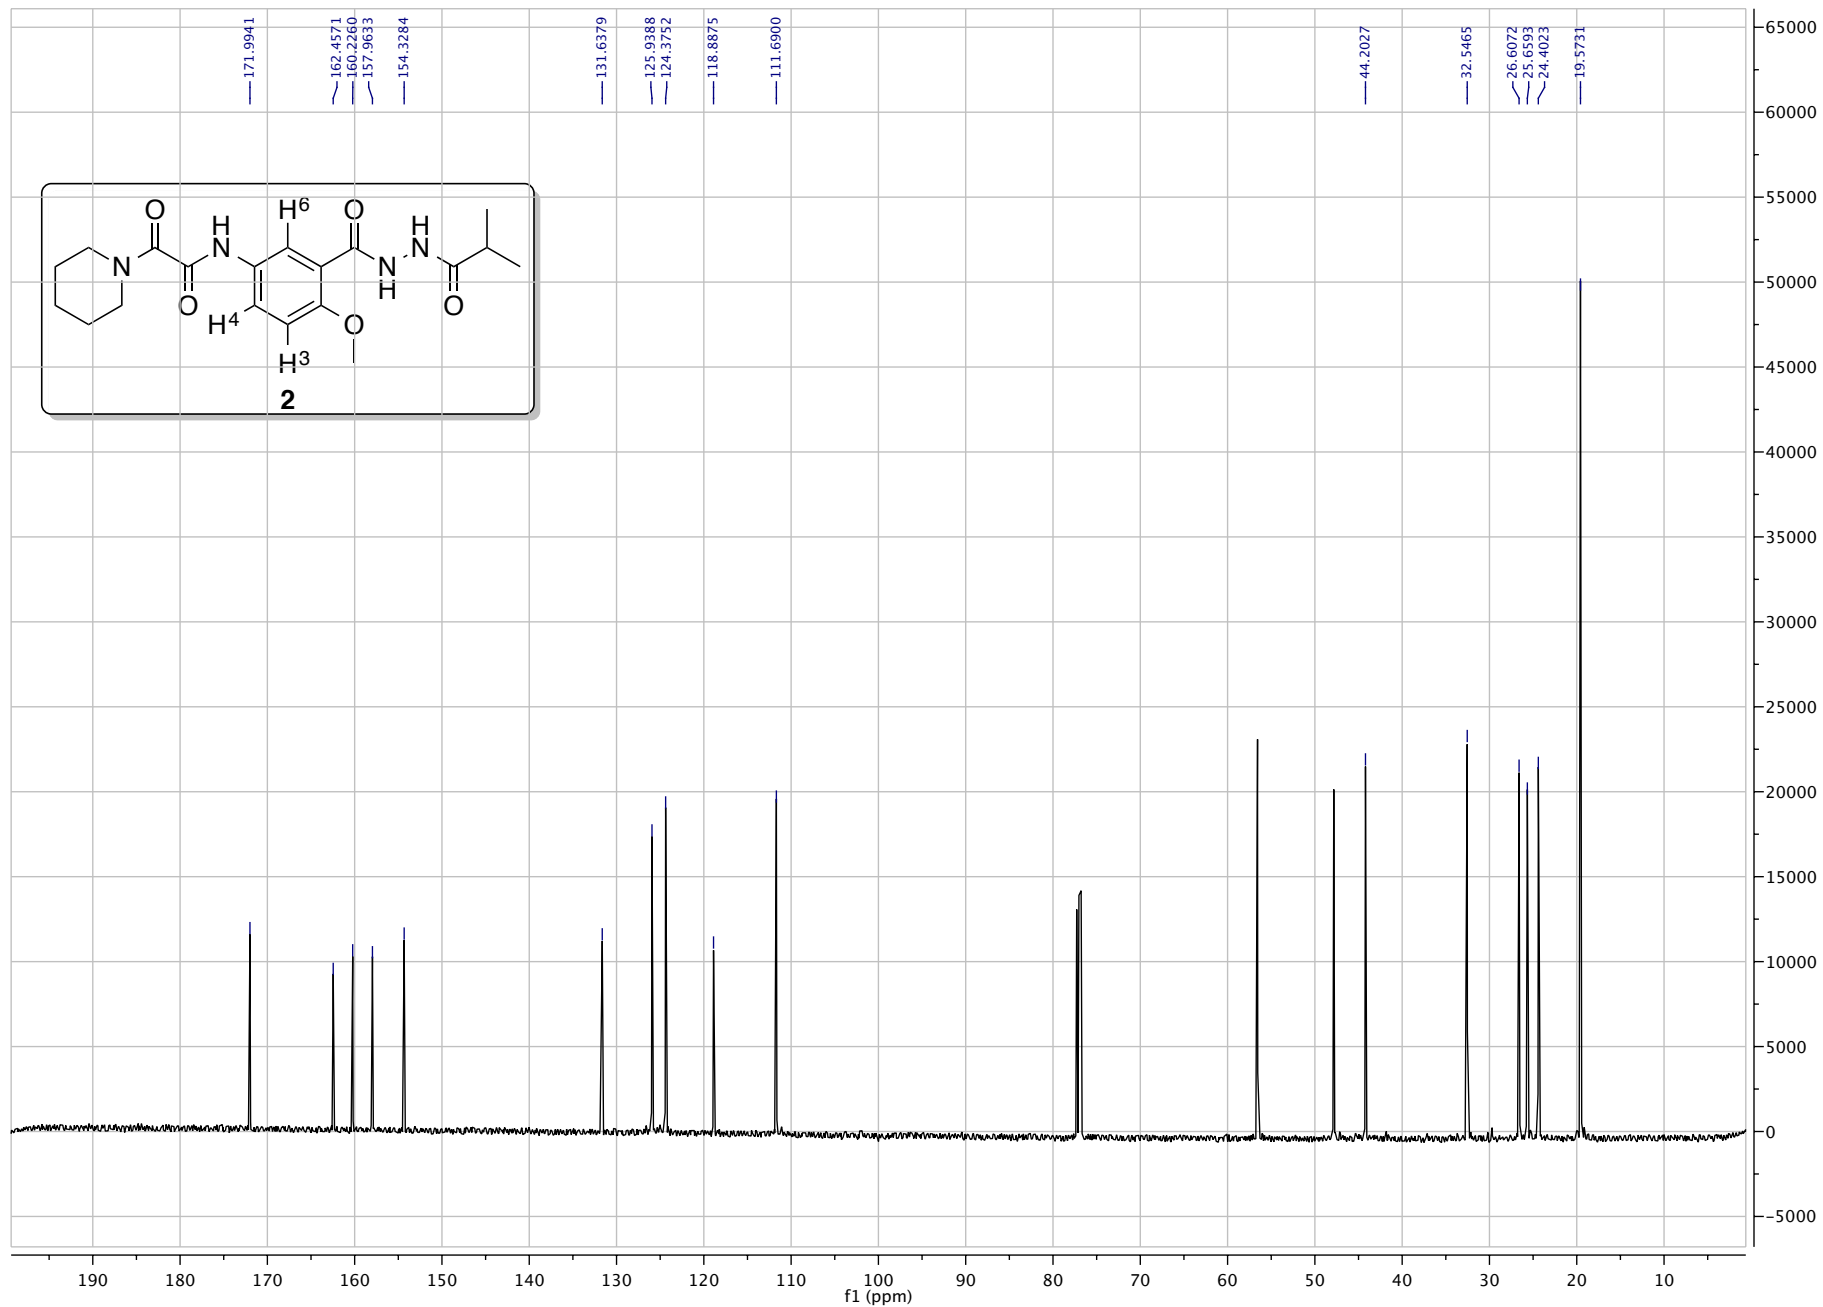



<sup>1</sup>H NMR (500 MHz, CDCl<sub>3</sub>)

*N*-(3-(2-isobutrylhydrazine-1-carbonyl)-methoxyphenyl)butyramide (2a)

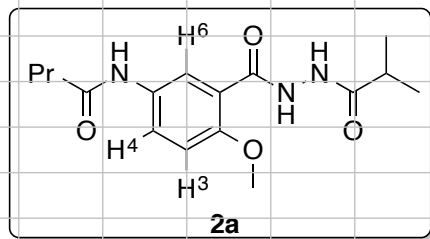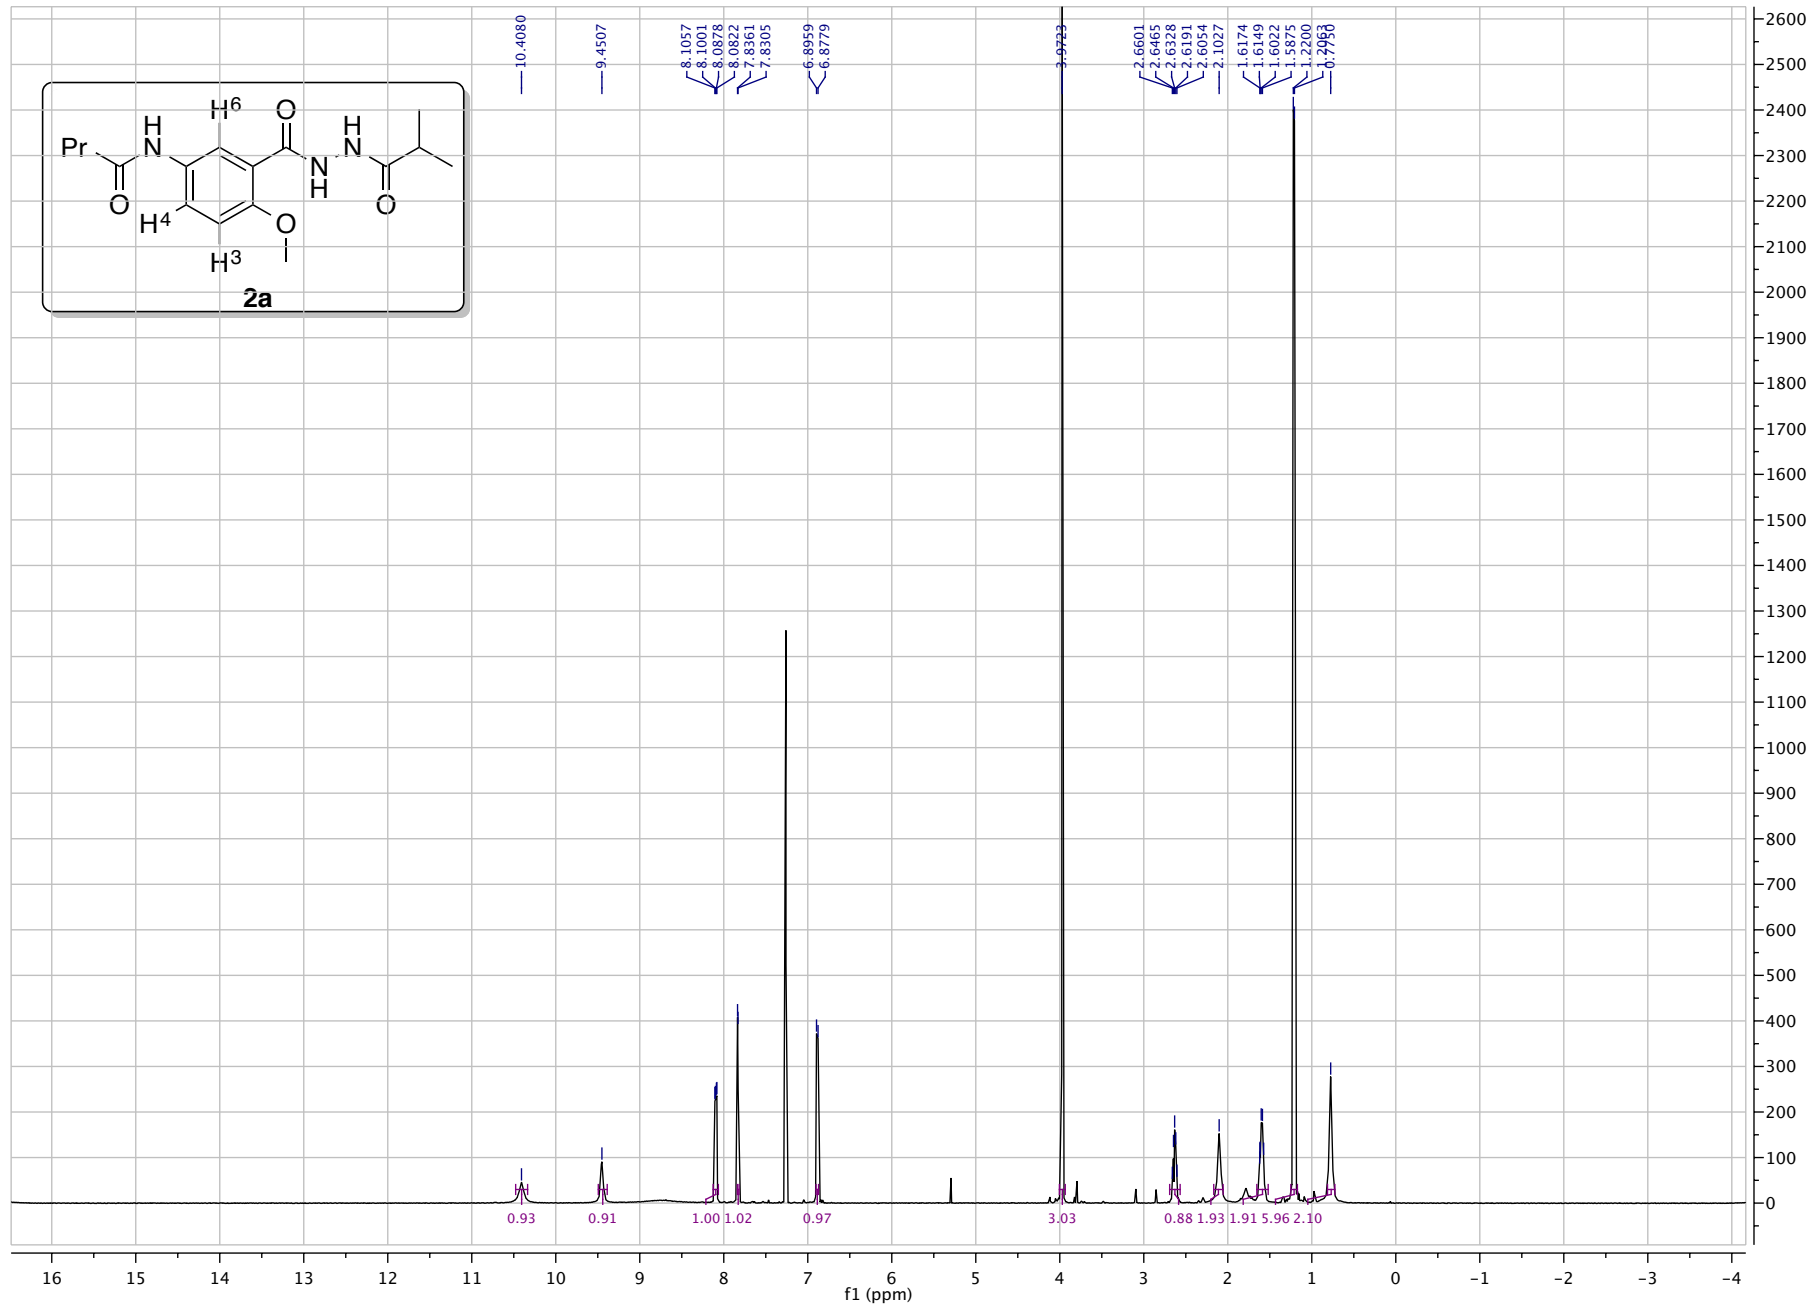

<sup>13</sup>C NMR (126 MHz, CDCl<sub>3</sub>)

*N*-(3-(2-isobutyrylhydrazine-1-carbonyl)-methoxyphenyl)butyramide (2a)

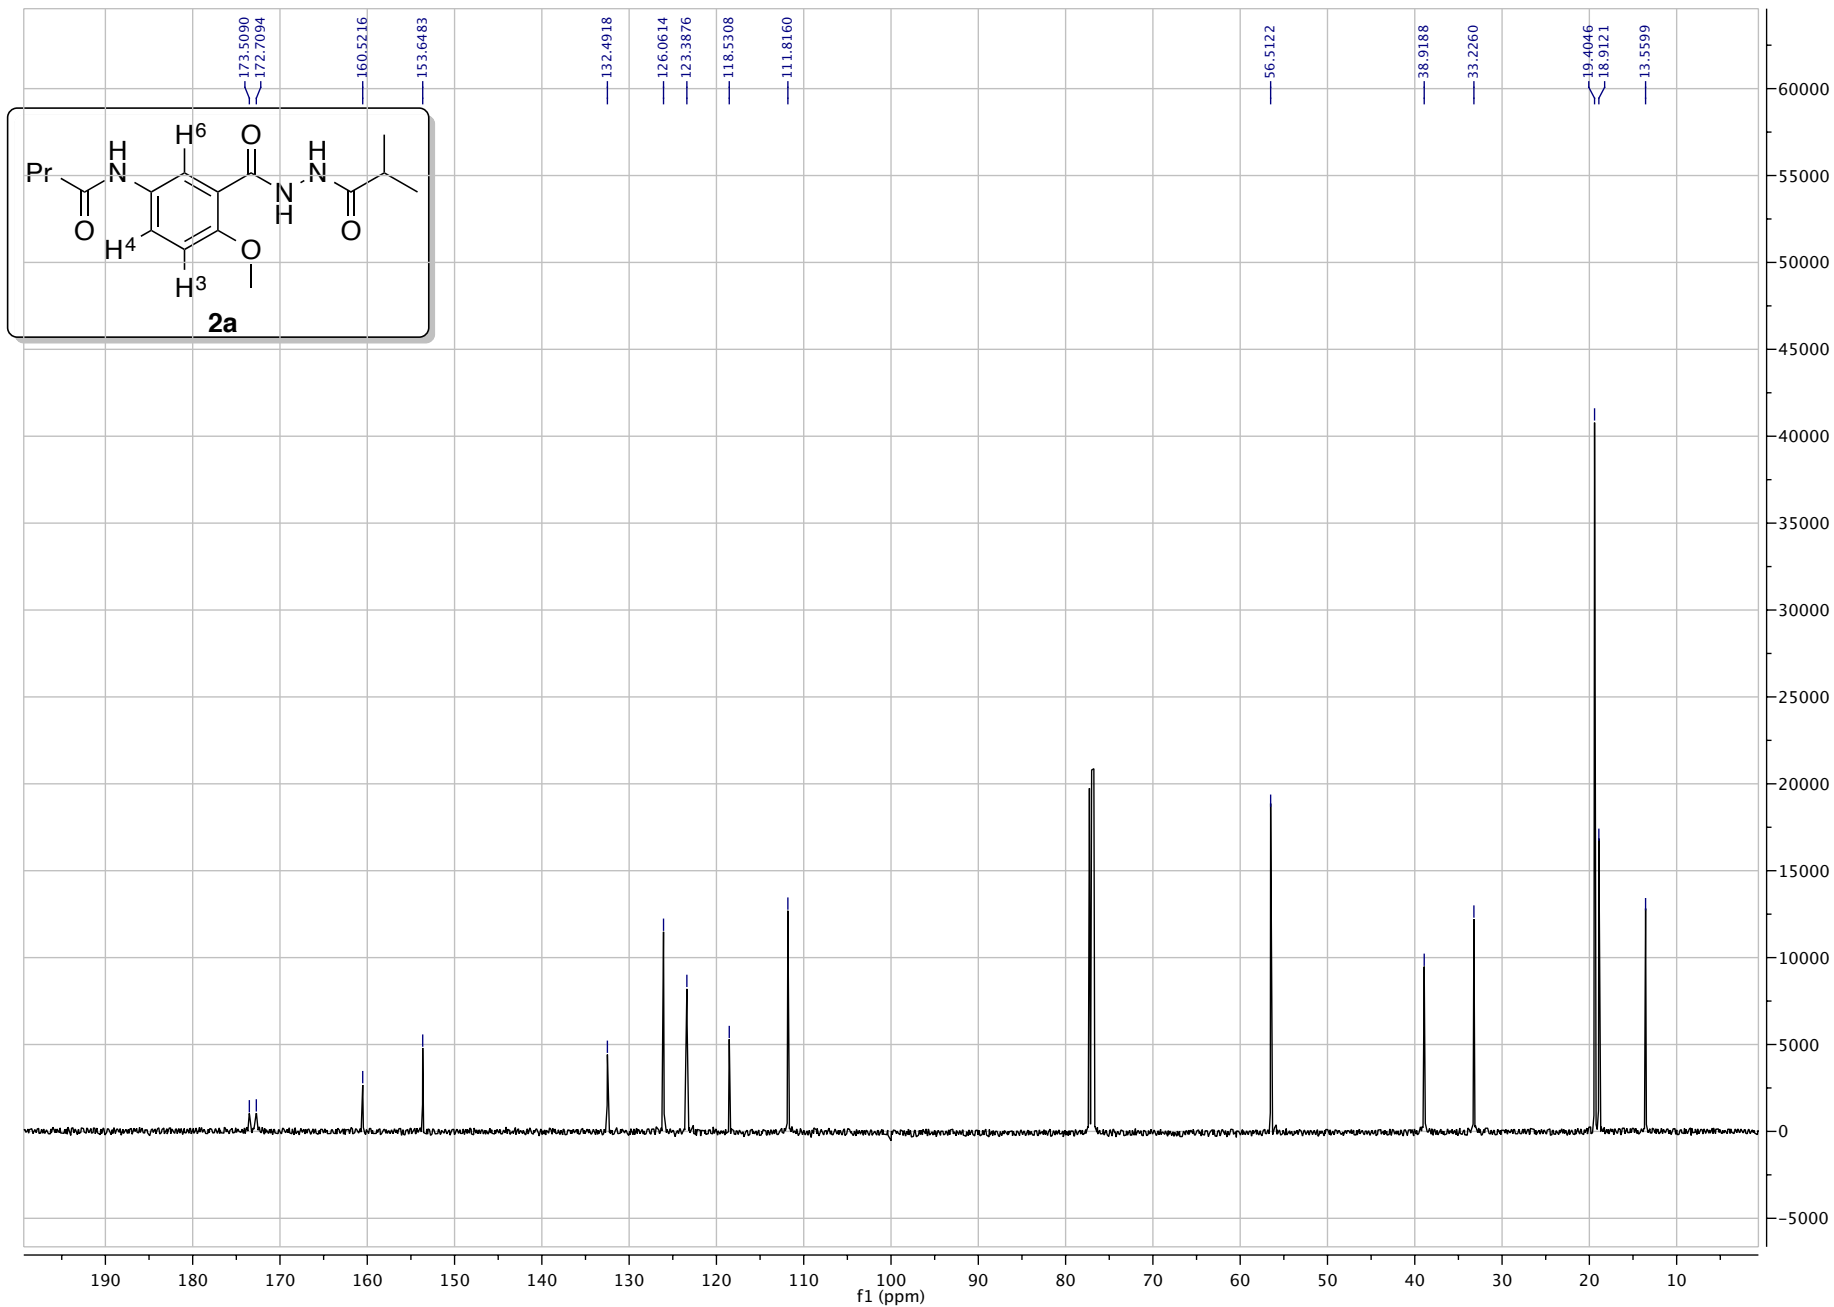

<sup>1</sup>H NMR (500 MHz, CDCl<sub>3</sub>)

(S)-N-((S)-1-(butylamino)-3-methyl-1-oxobutan-2-yl)-2-((S)-2-isobutyramido-3-phenylpropanamido)-4-methylpentanamide

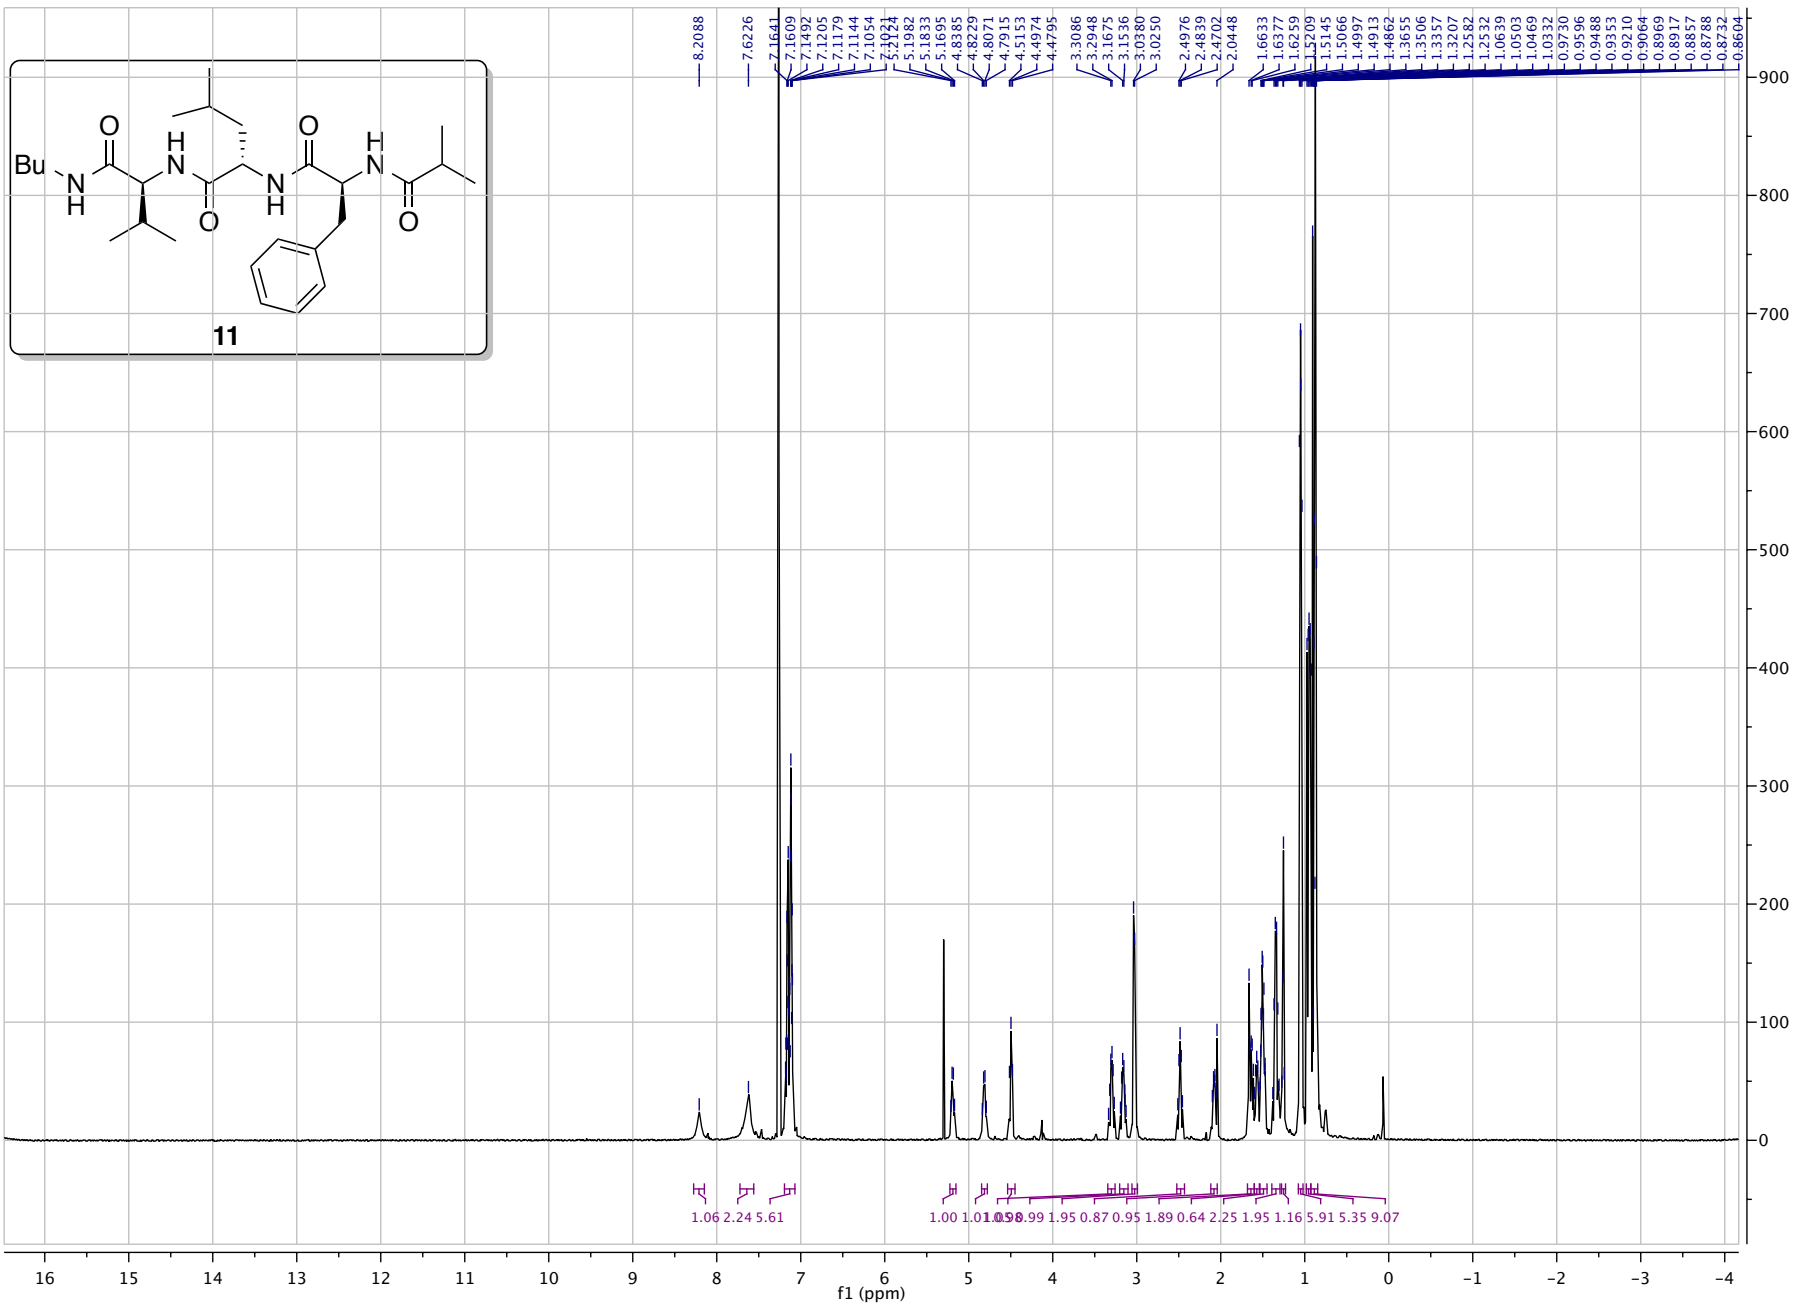

<sup>13</sup>C NMR (126 MHz, CDCl<sub>3</sub>)

(S)-N-((S)-1-(butylamino)-3-methyl-1-oxobutan-2-yl)-2-((S)-2-isobutyramido-3-phenylpropanamido)-4-methylpentanamide

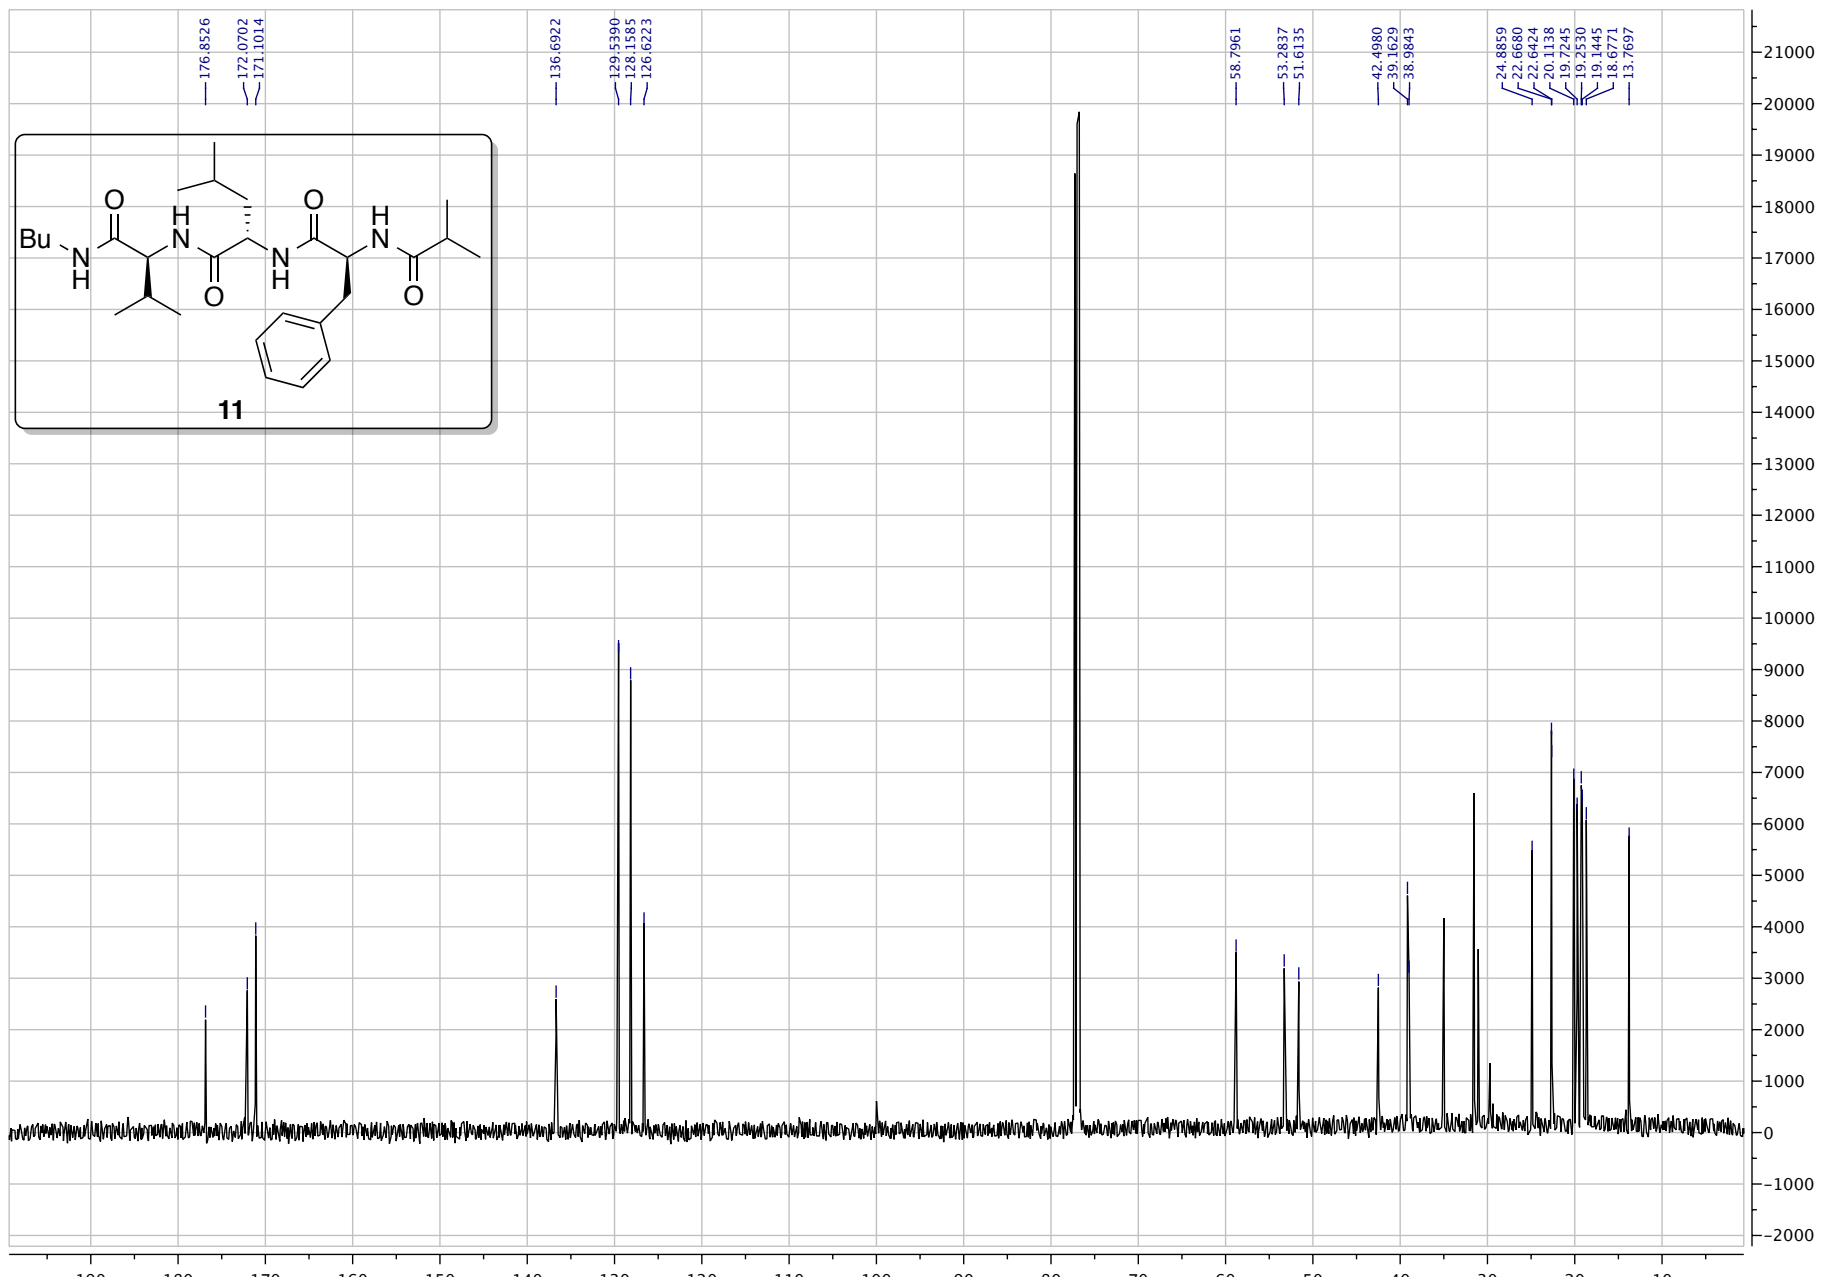

Supplement: c5ob00886g1.pdf [file c5ob00886g1.pdf]
