# Supplementary material for: A model β-sheet interaction and thermodynamic analysis of β-strand mimetics
Source: Royal Society of Chemistry journal article supplement (doi:10.1039/c5ob00886g), 2015-01-01

## Supplementary Information

### Table of Contents

|                                                                                             |           |
|---------------------------------------------------------------------------------------------|-----------|
| <b>1. Experimental .....</b>                                                                | <b>3</b>  |
| <b>1.1. General Experimental .....</b>                                                      | <b>3</b>  |
| <b>1.2. Experimental Procedures .....</b>                                                   | <b>4</b>  |
| <b>2. <sup>1</sup>H NMR Titration Data .....</b>                                            | <b>15</b> |
| <b>2.1. Compound 1 Homodimer VT <sup>1</sup>H NMR Titration.....</b>                        | <b>15</b> |
| <b>2.1.1. Compound 1 Homodimer <sup>1</sup>H NMR Titration Experiment 1 .....</b>           | <b>15</b> |
| <b>2.1.2. Compound 1 Homodimer <sup>1</sup>H NMR Titration Experiment 2 .....</b>           | <b>18</b> |
| <b>2.1.3. Compound 1 Homodimer <sup>1</sup>H NMR Titration Experiment 3 .....</b>           | <b>21</b> |
| <b>2.2.4. Compound 1 Homodimer VT <sup>1</sup>H NMR Summary and Van't Hoff Plots .....</b>  | <b>24</b> |
| <b>2.2. Tripeptide 11 Homodimer <sup>1</sup>H NMR Titration .....</b>                       | <b>25</b> |
| <b>2.2.1 Compound 11 Homodimer <sup>1</sup>H NMR Titration Experiment 1 .....</b>           | <b>26</b> |
| <b>2.2.2. Compound 11 Homodimer <sup>1</sup>H NMR Titration Experiment 2 .....</b>          | <b>29</b> |
| <b>2.2.3. Compounds 11 Homodimer <sup>1</sup>H NMR Titration Experiment 3.....</b>          | <b>31</b> |
| <b>2.2.4. Compound 11 Homodimer VT <sup>1</sup>H NMR Summary and Van't Hoff Plots .....</b> | <b>33</b> |
| <b>2.3. Compound 2 Homodimer VT <sup>1</sup>H NMR Titration.....</b>                        | <b>34</b> |
| <b>2.3.1. Compound 2 Homodimer <sup>1</sup>H NMR Titration Experiment 1.....</b>            | <b>34</b> |
| <b>2.3.2. Compound 2 Homodimer <sup>1</sup>H NMR Titration Experiment 2.....</b>            | <b>37</b> |
| <b>2.3.3. Compound 2 Homodimer <sup>1</sup>H NMR Titration Experiment 3 .....</b>           | <b>40</b> |
| <b>2.3.4. Compound 2 Homodimer VT <sup>1</sup>H NMR Summary and Van't Hoff Plots .....</b>  | <b>43</b> |
| <b>2.4. 11:1 Heterodimer VT <sup>1</sup>H NMR Titration Experiment .....</b>                | <b>44</b> |
| <b>2.4.1 11:1 Heterodimer <sup>1</sup>H NMR Titration Experiment 1 .....</b>                | <b>44</b> |
| <b>2.4.2. 11:1 Heterodimer <sup>1</sup>H NMR Titration Experiment 2 .....</b>               | <b>47</b> |
| <b>2.4.3. 11:1 Heterodimer <sup>1</sup>H NMR Titration Experiment 3 .....</b>               | <b>50</b> |
| <b>2.4.4. 11:1 Heterodimer VT <sup>1</sup>H NMR Summary and Van't Hoff Plots .....</b>      | <b>53</b> |
| <b>2.5. 11:2 Heterodimer VT <sup>1</sup>H NMR Titration Experiment .....</b>                | <b>54</b> |
| <b>2.5.1. 11:2 Heterodimer <sup>1</sup>H NMR Titration Experiment 1 .....</b>               | <b>54</b> |
| <b>2.5.2. 11:2 Heterodimer <sup>1</sup>H NMR Titration Experiment 2 .....</b>               | <b>57</b> |
| <b>2.5.3. 11:2 Heterodimer <sup>1</sup>H NMR Titration Experiment 3 .....</b>               | <b>60</b> |
| <b>2.5.4. 11:2 Heterodimer VT <sup>1</sup>H NMR Summary and Van't Hoff Plots .....</b>      | <b>63</b> |
| <b>2.6. 11:2a Heterodimer VT <sup>1</sup>H NMR Titration Experiment.....</b>                | <b>64</b> |
| <b>2.6.1. 11:2a Heterodimer <sup>1</sup>H NMR Titration Experiment 1 .....</b>              | <b>64</b> |
| <b>2.6.2. 11:2a Heterodimer <sup>1</sup>H NMR Titration Experiment 2 .....</b>              | <b>67</b> |
| <b>2.6.3. 11:2a Heterodimer <sup>1</sup>H NMR Titration Experiment 3 .....</b>              | <b>70</b> |
| <b>2.6.4. 11:2a Heterodimer VT <sup>1</sup>H NMR Summary and Van't Hoff Plots .....</b>     | <b>73</b> |
| <b>2.7. ROESY Study of 2:11 Heterodimer .....</b>                                           | <b>74</b> |
| <b>References.....</b>                                                                      | <b>75</b> |

# 1. Experimental

## 1.1. General Experimental

All anhydrous solvents and reagents were obtained from commercial suppliers (Aldrich, Alfa Aesar, Fluorochem) and used without further purification.

Reactions were performed in oven-dried, round-bottom flasks fitted with rubber septa under an atmosphere of argon unless otherwise stated. Analytical thin layer chromatography (TLC) was performed on pre-coated aluminium sheets of silica (60 F<sub>254</sub>, Merck) and visualised by short-wave UV light.

<sup>1</sup>H NMR spectra were recorded at 500 MHz on a Bruker Avance-500 using an internal deuterium lock. Chemical shifts were measured in parts per million (ppm) relative to tetramethylsilane ( $\delta = 0$ ) using the following internal references for residual protons in the solvent : CDCl<sub>3</sub> ( $\delta$  7.26) and (CD<sub>3</sub>)<sub>2</sub>SO ( $\delta$  2.50). Data is presented as follows: chemical shift, multiplicity, coupling constant (*J*) in Hz, integration and assignment.

<sup>13</sup>C NMR spectra were recorded at 126 MHz on a Bruker Avance-500 using an internal deuterium lock. Chemical shifts were measured in parts per million (ppm) relative to tetramethylsilane ( $\delta = 0$ ) using the following internal references for residual protons in the solvent: CDCl<sub>3</sub> ( $\delta$  77.0) and (CD<sub>3</sub>)<sub>2</sub>SO ( $\delta$  39.5). Data is presented as follows: chemical shift and assignment.

HRMS analysis was performed on an Agilent 1200 series HPLC and diode array detector coupled to a 6520 Quadrupole-Time of flight mass spectrometer with dual multimode APCI/ESI source. Analytical separation was carried out at 30 °C in a Merck Purospher STAR column (RP-18e, 30 x 4 mm) using a flow rate of 1.5 mL/min in a 4 min gradient elution with detection at 254 nm. The mobile phase was a mixture of methanol (solvent A) and water (solvent B) both containing formic acid at 0.1%. Gradient elution was as follows: 1:9 (A/B) to 9:1 (A/B) over 2.5 min, 9:1 A/B for 1 min, and then reversion back to 1:9 (A/B) over 0.3 min, finally 1:9 (A/B) for 0.2 min. The following reference masses were used for HRMS analysis: caffeine [M+H]<sup>+</sup> 195.087652; (hexakis(1H,1H,3H-tetrafluoropentoxy)phosphazene [M+H]<sup>+</sup> 922.009798 and hexakis(2,2-difluoroethoxy)phosphazene [M+H]<sup>+</sup> 622.02896 or reserpine [M+H]<sup>+</sup> 609.280657.

## 1.2. Experimental Procedures

### Synthesis of 2-(2-formyl-4-nitrophenoxy)acetonitrile (**3**)<sup>1</sup>

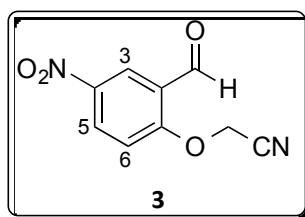

To a solution of 2-hydroxy-5-nitrobenzaldehyde (0.50 g, 3.0 mmol) in DMF (2.5 mL) was added  $K_2CO_3$  (0.60 g, 4.4 mmol). The resulting suspension was stirred for 15 min before the addition of bromoacetonitrile (0.40 mL, 5.8 mmol). The reaction was allowed to stir at room temperature for a period of 18 h. The reaction mixture was diluted with ethyl acetate and washed with water and brine. The organic layer was separated, dried over magnesium sulphate, and concentrated under vacuum. The crude material was purified by column chromatography (50% ethyl acetate in cyclohexane) to afford **3** (0.50 mg, 82%) as a pale yellow solid.

$^1H$  NMR (500 MHz,  $CDCl_3$ )  $\delta$  10.46 (s, 1H,  $HC=O$ ), 8.79 (d,  $J = 2.9$  Hz, 1H,  $H^3$ ), 8.55 (dd,  $J = 9.1, 2.9$  Hz, 1H,  $H^5$ ), 7.25 (d,  $J = 9.1$  Hz, 1H,  $H^6$ ), 5.08 (s, 2H,  $OCH_2CN$ );  $^{13}C$  NMR (126 MHz,  $CDCl_3$ )  $\delta$  186.1 ( $C_q$ ), 161.5 ( $C_q$ ), 130.6 (CH), 125.6 (CH), 125.3 ( $C_q$ ), 113.2 ( $C_q$ ), 112.8 (CH), 54.0 ( $CH_2$ ). N.B. Mass Spec. data could not be obtained. N.B. One  $C_q$  could not be resolved.

### Synthesis of 2-phenyl-6,7-dihydro-5H-pyrrolo[2,1-c][1,2,4]triazol-2-ium tetrafluoroborate (**4**)<sup>2</sup>

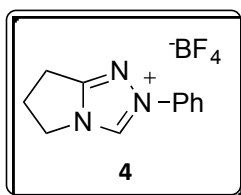

Trimethyloxonium tetrafluoroborate (0.96 g, 6.4 mmol) was added in one portion to a solution of pyrrolidin-2-one (0.50 g, 6.0 mmol) in DCM (20 mL). The reaction was allowed to stir at room temperature for 24 h. Phenylhydrazine (0.63 g, 5.8 mmol) was added and stirring was continued at room temperature for a further 48 h. The reaction mixture was then concentrated under vacuum and re-dissolved in a mixture

of methanol (2.0 mL) and triethyl orthoformate (8.0 ml). The solution was heated to reflux overnight and then allowed to cool to room temperature. The resulting precipitate was collected by filtration and washed with methanol to afford **4** (1.1 g, 70%) as a pale tan solid.

$^1\text{H}$  NMR (500 MHz, DMSO- $d_6$ )  $\delta$  10.70 (s, 1H, NCHNPh), 7.90 – 7.84 (m, 2H, ArCH), 7.72 – 7.66 (m, 2H, ArCH), 7.66 – 7.60 (m, 1H, ArCH), 4.66 – 4.13 (m, 2H, NCH $_2$ ), 3.23 – 3.12 (m, 2H, CH $_2$ ), 2.89 – 2.61 (m, 2H, CH $_2$ );  $^{13}\text{C}$  NMR (126 MHz,  $d_6$  DMSO)  $\delta$  163.5 (C $_q$ ), 138.8 (CH), 136.1 (C $_q$ ), 130.9 (CH), 130.7 (CH), 121.1 (CH), 47.4 (CH $_2$ ), 27.1 (CH $_2$ ), 21.7 (CH $_2$ ). NB. Mass spec. data could not be obtained.

### Synthesis of 3-amino-6-nitro-4*H*-chromen-4-one (**5**)<sup>1</sup>

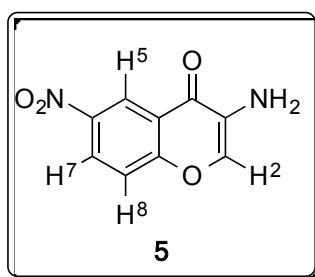

Compound **3** (0.47 g, 2.3 mmol) was dissolved in DCM (20 mL) before addition of catalyst **4**<sup>2</sup> (62 mg, 0.20 mmol) and DBU (30  $\mu\text{L}$ , 0.20 mmol). The resulting solution was allowed to stir at room temperature for 16 h. The reaction was then concentrated under vacuum. The crude material was purified by column chromatography (40-60% ethyl acetate in cyclohexane) to afford **5** (0.27 g, 57%) as an orange solid.

$^1\text{H}$  NMR (500 MHz, DMSO- $d_6$ )  $\delta$  8.82 (d,  $J$  = 2.9 Hz, 1H, **H**<sup>5</sup>), 8.46 (dd,  $J$  = 9.3, 2.9 Hz, 1H, **H**<sup>7</sup>), 8.06 (s, 1H, **H**<sup>2</sup>), 7.84 (d,  $J$  = 9.3 Hz, 1H, **H**<sup>8</sup>), 4.85 (s, 2H, NH $_2$ );  $^{13}\text{C}$  NMR (126 MHz, DMSO- $d_6$ )  $\delta$  171.8 (C $_q$ ), 158.4 (C $_q$ ), 143.8 (C $_q$ ), 137.3 (CH), 133.7 (C $_q$ ), 127.0 (CH), 121.9 (CH), 121.3 (C $_q$ ), 121.1 (CH); HRMS (ESI)  $[\text{M}+\text{H}]^+$  207.0403, C $_9$ H $_6$ N $_2$ O $_4$   $[\text{M}+\text{H}]^+$  requires 207.0406.

### Synthesis of *N*-(6-nitro-4-oxo-4*H*-chromen-3-yl)butyramide (**6**)

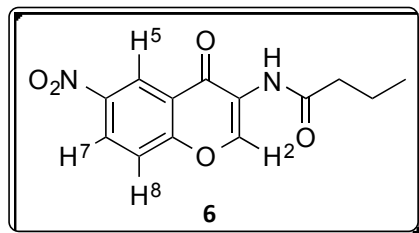

Compound **5** (0.17 g, 0.83 mmol) and DIPEA (0.22 mL, 1.2 mmol) were dissolved in THF (10 mL) and cooled to 0 °C before the addition of butyryl chloride (0.10 mL, 0.90 mmol). The reaction was allowed to warm to room temperature and stirred for 1 h. The reaction mixture was then diluted with ethyl acetate and washed with sat. NaHCO<sub>3</sub> (aq.) and brine. The organic layer was separated, dried over sodium sulphate and concentrated under vacuum. The crude material was purified by column chromatography (50% ethyl acetate in cyclohexane) to afford **6** (0.18 g, 80%) as an orange solid.

<sup>1</sup>H NMR (500 MHz, CDCl<sub>3</sub>) δ 9.52 (s, 1H, **H**<sup>2</sup>), 9.17 (d, *J* = 2.7 Hz, 1H, **H**<sup>5</sup>), 8.54 (dd, *J* = 9.2, 2.7 Hz, 1H, **H**<sup>7</sup>), 8.01 (s, 1H, NH), 7.69 (d, *J* = 9.2 Hz, 1H, **H**<sup>8</sup>), 2.56 – 2.41 (m, 2H, CH<sub>2</sub>CH<sub>2</sub>CH<sub>3</sub>), 1.88 – 1.72 (m, 2H, CH<sub>2</sub>CH<sub>2</sub>CH<sub>3</sub>), 1.04 (t, *J* = 7.4 Hz, 3H, CH<sub>2</sub>CH<sub>2</sub>CH<sub>3</sub>); <sup>13</sup>C NMR (126 MHz, CDCl<sub>3</sub>) δ 171.9 (C<sub>q</sub>), 170.9 (C<sub>q</sub>), 158.2 (C<sub>q</sub>), 145.0 (CH), 128.0 (CH), 125.1 (C<sub>q</sub>), 122.8 (CH), 121.7 (C<sub>q</sub>), 120.3 (CH), 39.0 (CH<sub>2</sub>), 18.8 (CH<sub>2</sub>), 13.6 (CH<sub>3</sub>); HRMS (ESI) [M+H]<sup>+</sup> 277.0818 C<sub>13</sub>H<sub>12</sub>N<sub>2</sub>O<sub>3</sub> [M+H]<sup>+</sup> requires 277.0819; N.B. One C<sub>q</sub> not resolved

### Synthesis of *N*-(6-amino-4-oxo-4*H*-chromen-3-yl)butyramide (**7**)

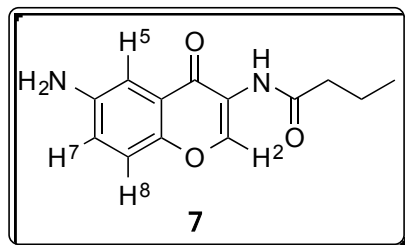

Compound **6** (0.18 g, 0.70 mmol), iron powder (0.26 g, 4.6 mmol) and ammonium chloride (0.25 g, 4.6 mmol) were heated to reflux in a mixture of ethanol and water

(3:1) (20 mL) for 16 h. The reaction mixture was diluted with ethyl acetate and filtered through celite and then washed with sat. NaHCO<sub>3</sub> (aq.) and brine. The organic layer was separated, dried over sodium sulphate and concentrated under vacuum. The crude material was purified by column chromatography (35-60% ethyl acetate in DCM) to afford **7** (0.12 g, 76%) as a yellow solid.

<sup>1</sup>H NMR (500 MHz, CDCl<sub>3</sub>) δ 9.38 (s, 1H, H<sup>2</sup>), 8.05 (s, 1H, NH), 7.41 (d, *J* = 2.9 Hz, 1H, H<sup>5</sup>), 7.37 (d, *J* = 9.0 Hz, 1H, H<sup>8</sup>), 7.08 (dd, *J* = 9.0, 2.9 Hz, 1H, H<sup>7</sup>), 3.89 (s, 2H, NH<sub>2</sub>), 2.61 – 2.27 (m, 2H, CH<sub>2</sub>CH<sub>2</sub>CH<sub>3</sub>), 1.85 – 1.70 (m, 2H, CH<sub>2</sub>CH<sub>2</sub>CH<sub>3</sub>), 1.03 (t, *J* = 7.4 Hz, 3H, CH<sub>2</sub>CH<sub>2</sub>CH<sub>3</sub>); <sup>13</sup>C NMR (126 MHz, CDCl<sub>3</sub>) δ 171.6 (C<sub>q</sub>), 171.5 (C<sub>q</sub>), 149.7 (C<sub>q</sub>), 144.8 (CH), 143.5 (C<sub>q</sub>), 123.7 (C<sub>q</sub>), 122.9 (CH), 122.6 (C<sub>q</sub>), 119.5 (CH), 107.2 (CH), 39.1 (CH<sub>2</sub>), 18.9 (CH<sub>2</sub>), 13.7 (CH<sub>3</sub>); HRMS (ESI) [M+H]<sup>+</sup> 247.1077, C<sub>13</sub>H<sub>14</sub>N<sub>2</sub>O<sub>3</sub> [M+H]<sup>+</sup> requires 247.1077.

#### Synthesis of ethyl 2-oxo-2-(piperidin-1-yl)acetate (**8a**)

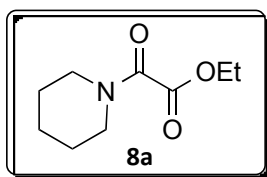

Piperidine (1.2 mL, 11.7 mmol) and DIPEA (3.1 mL, 17.6 mmol) were dissolved in DCM (15 mL) and cooled to 0 °C before the addition of ethyl 2-chloro-2-oxoacetate (1.6 mL, 14.1 mmol). The reaction was allowed to warm to room temperature and stirred for 2 h. The reaction was then diluted with DCM and washed with sat. NaHCO<sub>3</sub> (aq.) and brine. The organic layer was separated, dried over sodium sulphate and concentrated under vacuum. The crude material was purified by column chromatography (10-50% ethyl acetate in cyclohexane) to afford compound **8a** (1.9 g, 85 %) as a colourless oil.

<sup>1</sup>H NMR (500 MHz, CDCl<sub>3</sub>) δ 4.34 (q, *J* = 7.2 Hz, 2H, OCH<sub>2</sub>CH<sub>3</sub>), 3.60 – 3.54 (m, 2H, NCH<sub>2</sub>), 3.37 – 3.32 (m, 2H, NCH<sub>2</sub>), 1.67-1.73 (m, 2H, CH<sub>2</sub>CH<sub>2</sub>CH<sub>2</sub>), 1.59-1.66 (m, 4H, CH<sub>2</sub>CH<sub>2</sub>CH<sub>2</sub>), 1.37 (t, *J* = 7.2 Hz, 3H, OCH<sub>2</sub>CH<sub>3</sub>); <sup>13</sup>C NMR (126 MHz, CDCl<sub>3</sub>) δ 163.2 (C<sub>q</sub>), 160.2 (C<sub>q</sub>), 61.8 (CH<sub>2</sub>), 47.2 (CH<sub>2</sub>), 42.17 (CH<sub>2</sub>), 26.1 (CH<sub>2</sub>), 25.1 (CH<sub>2</sub>), 24.3 (CH<sub>2</sub>), 14.0 (CH<sub>3</sub>); HRMS (ESI) [M+Na]<sup>+</sup> 208.0942, C<sub>9</sub>H<sub>15</sub>NO<sub>3</sub> [M+Na]<sup>+</sup> requires 208.0944.

### Synthesis of 2-oxo-2-(piperidin-1-yl)acetic acid (**8**)

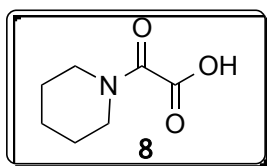

Sodium hydroxide 0.45 M (16.0 mL, 11.0 mmol) was cooled to 0 °C before the addition of compound **8a** (1.9 g, 10.0 mmol) in THF (40 mL). The reaction was allowed to stir overnight. The reaction mixture was acidified to pH 1 with 1 M HCl (aq.) and extracted with ethyl acetate (x 3). The combined organic extracts were dried over sodium sulphate and concentrated to afford compound **8** (1.5 g, 96 %) as a white solid.

$^1\text{H}$  NMR (500 MHz,  $\text{CDCl}_3$ )  $\delta$  4.13-4.08 (m, 2H,  $\text{NCH}_2$ ), 3.69-3.64 (m, 2H,  $\text{NCH}_2$ ), 1.81 – 1.42 (m, 6H,  $\text{CH}_2\text{CH}_2\text{CH}_2\text{CH}_2\text{CH}_2$ );  $^{13}\text{C}$  NMR (126 MHz,  $\text{CDCl}_3$ )  $\delta$  161.4 ( $\text{C}_q$ ), 159.4 ( $\text{C}_q$ ), 47.9 ( $\text{CH}_2$ ), 45.2 ( $\text{CH}_2$ ), 26.6 ( $\text{CH}_2$ ), 25.6 ( $\text{CH}_2$ ), 24.1 ( $\text{CH}_2$ ); HRMS (ESI)  $[\text{M}+\text{H}]^+$  158.0812,  $\text{C}_7\text{H}_{11}\text{NO}_3$   $[\text{M}+\text{H}]^+$  requires 158.0812.

### Synthesis of *N*-(4-oxo-6-(2-oxo-2-(piperidin-1-yl)acetamido)-4*H*-chromen-3-yl)butyramide (**1**)

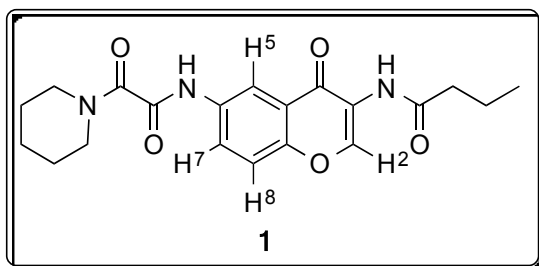

Compound **8** (30 mg, 0.20 mmol) and DIPEA (80  $\mu\text{L}$ , 0.50 mmol) were dissolved in DMF (1.5 mL) before the addition of HATU (94 mg, 0.30 mmol) and **7** (42 mg, 0.20 mmol). After a period of 16 h the reaction mixture was diluted with ethyl acetate and washed with sat.  $\text{NaHCO}_3$  (aq.) and brine. The organic layer was separated, dried over sodium sulphate and concentrated under vacuum. The crude material was purified by column chromatography (50-80% ethyl acetate in cyclohexane) to afford **1** (48 mg, 65%) as a cream solid.

$^1\text{H}$  NMR (500 MHz,  $\text{CDCl}_3$ )  $\delta$  9.97 (s, 1H, NH), 9.50 (s, 1H,  $\text{H}^2$ ), 8.51 (s, 1H, NH), 8.46 (d,  $J = 2.6$  Hz, 1H,  $\text{H}^5$ ), 8.28 (dd,  $J = 9.2, 2.6$  Hz, 1H,  $\text{H}^7$ ), 7.55 (d,  $J = 9.2$  Hz, 1H,  $\text{H}^8$ ), 4.13 - 4.08 (m, 2H,  $\text{NCH}_2$ ), 3.74 - 3.53 (m, 2H,  $\text{NCH}_2$ ), 2.50 (t,  $J = 7.5$  Hz, 2H,  $\text{CH}_2\text{CH}_2\text{CH}_3$ ), 1.82 - 1.75 (m, 2H,  $\text{CH}_2\text{CH}_2\text{CH}_3$ ), 1.74 - 1.69 (m, 6H,  $\text{CH}_2\text{CH}_2\text{CH}_2\text{CH}_2\text{CH}_2$ ), 1.02 (t,  $J = 7.4$  Hz, 3H,  $\text{CH}_2\text{CH}_2\text{CH}_3$ );  $^{13}\text{C}$  NMR (126 MHz,  $\text{CDCl}_3$ )  $\delta$  172.2 ( $\text{C}_q$ ), 171.6 ( $\text{C}_q$ ), 160.3 ( $\text{C}_q$ ), 159.3 ( $\text{C}_q$ ), 152.6 ( $\text{C}_q$ ), 145.5 (CH), 134.4 ( $\text{C}_q$ ), 126.6 (CH), 124.5 ( $\text{C}_q$ ), 122.2 ( $\text{C}_q$ ), 119.3 (CH), 115.7 (CH), 47.7 ( $\text{CH}_2$ ), 45.0 ( $\text{CH}_2$ ), 38.8 ( $\text{CH}_2$ ), 26.8 ( $\text{CH}_2$ ), 25.8 ( $\text{CH}_2$ ), 24.4 ( $\text{CH}_2$ ), 18.9 ( $\text{CH}_2$ ), 13.7 ( $\text{CH}_3$ ); HRMS (ESI)  $[\text{M}+\text{H}]^+$  386.1714,  $\text{C}_{20}\text{H}_{23}\text{N}_3\text{O}_5$   $[\text{M}+\text{H}]^+$  requires 386.1710.

### Synthesis of *N*-isobutyryl-2-methoxy-5-nitrobenzohydrazide (**9**)<sup>3</sup>

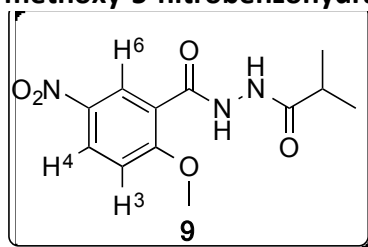

Thionyl chloride (1.2 mL), 2-methoxy-5-nitrobenzoic acid (0.20 g, 1.0 mmol) and DMF (10  $\mu\text{L}$ ) were heated to reflux for 2 h. The reaction mixture was concentrated to give a yellow solid. The crude acid chloride was dissolved in DCM (10 mL) and cooled to 0  $^\circ\text{C}$  before the addition of isobutyryl hydrazine (0.11 g, 1.1 mmol) and triethylamine (0.17 mL, 1.2 mmol) in DCM (10 mL). The reaction was allowed to warm to room temperature and stir for 2 h. The reaction mixture was then poured into sat.  $\text{NaHCO}_3$  (aq.), the organic layer was separated and the aqueous extracted with DCM (x 3). The combined organic extracts were dried over sodium sulphate and concentrated under vacuum. The crude material was purified by column chromatography (50-100% ethyl acetate in DCM) to isolate compound **9** (0.26 g, 90% yield) as a white solid.

$^1\text{H}$  NMR (500 MHz,  $\text{CDCl}_3$ )  $\delta$  10.82 (d,  $J = 7.3$  Hz, 1H, NH), 9.85 (d,  $J = 7.4$  Hz, 1H, NH), 9.07 (d,  $J = 2.9$  Hz, 1H,  $\text{H}^6$ ), 8.39 (dd,  $J = 9.1, 3.0$  Hz, 1H,  $\text{H}^4$ ), 7.15 (d,  $J = 9.2$  Hz, 1H,  $\text{H}^3$ ), 4.19 (s, 3H,  $\text{OCH}_3$ ), 2.72 (hept.,  $J = 6.9$  Hz, 1H, CH), 1.28 (d,  $J = 6.9$  Hz, 6H, 2 x  $\text{CH}_3$ );  $^{13}\text{C}$  NMR (126 MHz,  $\text{CDCl}_3$ )  $\delta$  172.5 ( $\text{C}_q$ ), 161.5 ( $\text{C}_q$ ), 157.4 ( $\text{C}_q$ ), 142.0 ( $\text{C}_q$ ), 128.7



(CH), 128.0 (CH), 119.8 (C<sub>q</sub>), 112.0 (CH), 57.4 (CH<sub>3</sub>), 33.4 (CH), 19.3 (2 x CH<sub>3</sub>); HRMS (ESI) [M+H]<sup>+</sup> 282.1079, C<sub>12</sub>H<sub>15</sub>N<sub>3</sub>O<sub>5</sub> [M+H]<sup>+</sup> requires 282.1084.

### Synthesis of 5-amino-*N*-isobutyryl-2-methoxybenzohydrazide (**10**)<sup>3</sup>

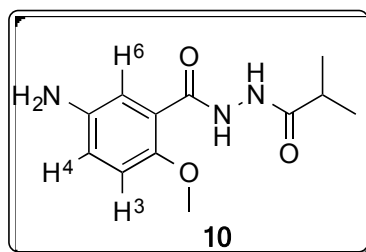

Compound **10** (0.10 g, 0.40 mmol) was dissolved in THF (10 mL) and the reaction flask was purged by vacuum/argon cycles (x 3) before the addition of palladium 10% on carbon (10 mg). The reaction vessel was placed under an atmosphere of hydrogen (40 psi) and stirred for 2 h at room temperature. The reaction mixture was filtered through celite and concentrated under vacuum. The crude material was purified by column chromatography (0-10% EtOH in DCM) to isolate compound **10** (85 mg, 95 % yield) as a yellow solid.

<sup>1</sup>H NMR (500 MHz, CDCl<sub>3</sub>) δ 10.94 (d, *J* = 7.4 Hz, 1H, NH), 9.54 (d, *J* = 7.5 Hz, 1H, NH), 7.51 (dd, *J* = 2.4, 1.0 Hz, 1H, H<sup>4</sup>), 6.83 (m, 2H, H<sup>3</sup>+H<sup>6</sup>), 3.96 (s, 3H, OCH<sub>3</sub>), 2.59 (hept., *J* = 6.9 Hz, 1H, CH), 1.23 (d, *J* = 6.9 Hz, 6H, 2xCH<sub>3</sub>); <sup>13</sup>C NMR (126 MHz, CDCl<sub>3</sub>) δ 172.1 (C<sub>q</sub>), 160.2 (C<sub>q</sub>), 150.8 (C<sub>q</sub>), 140.4 (C<sub>q</sub>), 120.1 (CH), 119.1 (C<sub>q</sub>), 117.9 (CH), 112.8 (CH), 56.5 (CH<sub>3</sub>), 33.4 (CH), 19.4 (2 x CH<sub>3</sub>); HRMS (ESI) [M+H]<sup>+</sup> 252.1341, C<sub>12</sub>H<sub>17</sub>N<sub>3</sub>O<sub>3</sub> [M+H]<sup>+</sup> requires 252.1343.

### Synthesis of *N*-(3-(2-isobutyrylhydrazinecarbonyl)-4-methoxyphenyl)-2-oxo-2-(piperidin-1-yl)acetamide (**2**)

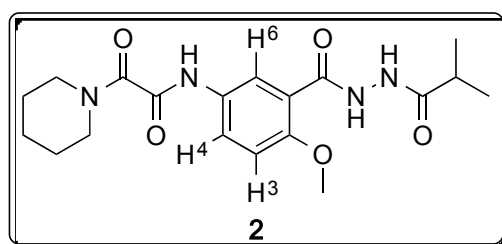

Compound **8** (0.2 g, 1.2 mmol), thionyl chloride (4.5 ml) and DMF (10 μL) were heated to reflux for 2 h. The reaction mixture was concentrated to give a yellow

solid. The crude acid chloride was dissolved in DCM (5.0 mL) and cooled to 0 °C before compound **10** (0.24 mg, 1.0 mmol) and triethylamine (0.16 mL, 1.2 mmol) in DCM (5.0 mL) were added. The reaction was allowed to warm to room temperature and stir for 1 h before it was poured into sat. NaHCO<sub>3</sub> (aq.). The organic layer was separated and the aqueous layer was extracted with DCM (x 3). The combined organic extracts were dried over sodium sulphate and concentrated under vacuum. The crude material was purified by column chromatography (50-100% ethyl acetate in DCM) to afford compound **2** (0.36 g, 97 % yield) as a white solid.

<sup>1</sup>H NMR (500 MHz, CDCl<sub>3</sub>) δ 11.34 (d, *J* = 8.4 Hz, 1H, NH), 11.07 (d, *J* = 8.3 Hz, 1H, NH), 10.71 (s, 1H, NH), 8.41 (d, *J* = 2.8 Hz, 1H, H<sup>6</sup>), 8.37 (dd, *J* = 8.9, 2.7 Hz, 1H, H<sup>4</sup>), 7.01 (d, *J* = 9.0 Hz, 1H, H<sup>3</sup>), 4.05 (s, 3H, OCH<sub>3</sub>) 3.84 (t, *J* = 4.9 Hz, 2H, NCH<sub>2</sub>), 3.63 (t, *J* = 5.3 Hz, 2H, NCH<sub>2</sub>), 2.84 (hept., *J* = 6.8 Hz, 1H, CH), 1.72-1.62 (m, 6H, CH<sub>2</sub>CH<sub>2</sub>CH<sub>2</sub>), 1.22 (d, *J* = 6.9 Hz, 6H, 2 x CH<sub>3</sub>); <sup>13</sup>C NMR (126 MHz, CDCl<sub>3</sub>) δ 172.0 (C<sub>q</sub>), 162.5 (C<sub>q</sub>), 160.2 (C<sub>q</sub>), 158.0 (C<sub>q</sub>), 154.3 (C<sub>q</sub>), 131.6 (C<sub>q</sub>), 125.9 (CH), 124.4 (CH), 118.9 (C<sub>q</sub>), 111.7 (CH), 56.6 (CH<sub>3</sub>), 47.8 (CH<sub>2</sub>), 44.2 (CH<sub>2</sub>), 32.6 (CH), 26.6 (CH<sub>2</sub>), 25.7 (CH<sub>2</sub>), 24.4 (CH<sub>2</sub>), 19.6 (2 x CH<sub>3</sub>); HRMS (ESI) [M+H]<sup>+</sup> 391.1964, C<sub>19</sub>H<sub>26</sub>N<sub>4</sub>O<sub>5</sub> [M+H]<sup>+</sup> requires 391.1976.

### Synthesis of *N*-(3-(2-isobutyrylhydrazine-1-carbonyl)-methoxyphenyl)butyramide (**2a**)

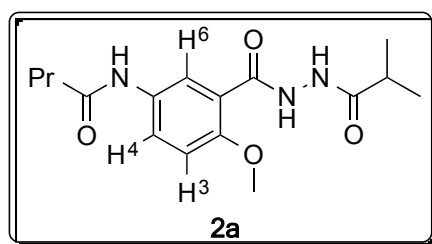

Compound **10** (0.5 g, 2.0 mmol) and pyridine (0.24 mL, 3.0 mmol) were dissolved in DCM (10 mL) and cooled to 0 °C before the addition of butyric anhydride (0.36 mL, 2.2 mmol). The reaction was allowed to warm to room temperature and stirred for 1 h. The reaction mixture was then diluted with DCM and washed with sat. NaHCO<sub>3</sub> (aq.) and brine. The organic layer was separated, dried over sodium sulphate and concentrated under vacuum. The crude material was purified by column chromatography (0-10% EtOH in DCM) to afford **2a** (0.53 g, 83 % yield) as a white

solid.

$^1\text{H}$  NMR (500 MHz,  $\text{CDCl}_3$ )  $\delta$  10.41 (s, 1H, NH), 9.45 (s, 1H, NH), 8.09 (dd,  $J = 9.0, 2.8$  Hz, 1H,  $\text{H}^4$ ), 7.83 (d,  $J = 2.8$  Hz, 1H,  $\text{H}^6$ ), 6.89 (d,  $J = 9.0$  Hz, 1H,  $\text{H}^3$ ), 3.97 (s, 3H,  $\text{OCH}_3$ ), 2.63 (app. quint.,  $J = 6.9$  Hz, 1H, CH), 2.10 (s, 2H,  $\text{CH}_2$ ), 1.60 (q,  $J = 8.2, 7.3$  Hz, 2H,  $\text{CH}_2$ ), 1.21 (d,  $J = 6.9$  Hz, 6H, 2 x  $\text{CH}_3$ ), 0.78 (s, 3H,  $\text{CH}_3$ );  $^{13}\text{C}$  NMR (126 MHz,  $\text{CDCl}_3$ )  $\delta$  173.5 ( $\text{C}_q$ ), 172.7 ( $\text{C}_q$ ), 160.5 ( $\text{C}_q$ ), 153.6 ( $\text{C}_q$ ), 132.5 ( $\text{C}_q$ ), 126.1 (CH), 123.4 (CH), 118.5 ( $\text{C}_q$ ), 111.8 (CH), 56.5 ( $\text{CH}_3$ ), 38.9 ( $\text{CH}_2$ ), 33.2 (CH), 19.4 (2 x  $\text{CH}_3$ ), 18.9 ( $\text{CH}_2$ ), 13.6 ( $\text{CH}_3$ ); HRMS (ESI)  $[\text{M}+\text{H}]^+$  322.1757,  $\text{C}_{16}\text{H}_{23}\text{N}_3\text{O}_4$   $[\text{M}+\text{H}]^+$  requires 391.1761.

**Synthesis of (S)-N-((S)-1-(butylamino)-3-methyl-1-oxobutan-2-yl)-2-((S)-2-isobutyramido-3-phenylpropanamido)-4-methylpentanamide (11)<sup>4</sup>**

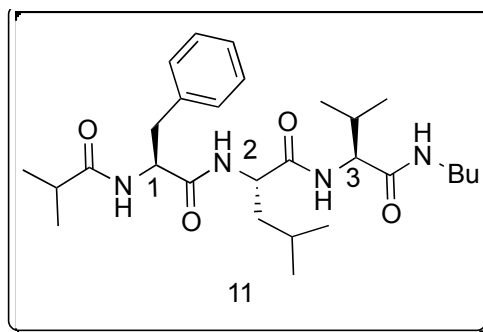

Compound **11** was synthesized *via* solid phase peptide synthesis using an Activotec P14 peptide synthesizer. Fmoc-Pal-Am Resin (2.5 g, 0.53 mmol/g) was shaken with DMF (2 x 25 ml) for 5 mins. The resin was then shaken with a 20% piperidine solution in NMP (3 x 25 ml) for 12 minutes. The resin was then washed (2 x DMF, 2 x DCM, 2 x MeOH, 2 x DCM and MeOH alternately and then diethyl ether).

- To the resin was added DCM (25 mL), collidine (1.0 mL, 8.0 mmol) and 2-nitrobenzene-1-sulfonyl chloride (0.88 g, 4.0 mmol). The resulting suspension was agitated for 3 h. The resin was drained and washed as described above.
- To the resin was added DMF (25 mL), 7-methyl-1,5,7-triazabicyclo[4.4.0]dec-5-ene (MTBD) (0.80 mL, 5.3 mmol) and 1-iodobutane (1.5 mL, 13.3 mmol). The resulting suspension agitated for a period of 8 h after which the resin was drained and washed as before.
- To the resin was added DMF (25 mL), DBU (1.0 mL, 6.6 mmol) and

mercaptoethanol (0.90 mL, 13.3 mmol). The resin was agitated for 3 h and then drained. The process was repeated and then resin was washed as before.

- Fmoc-Val-OH (4.5 g, 13.3 mmol) was dissolved in a 10% solution of DIPEA in DMF (25 mL) before the addition of HATU (4.5 g, 12.0 mmol). The reaction mixture was allowed to stir for 15 mins after which time it was added to the resin and agitated for 2 h. The process was repeated and the resin was washed as before.
- The resin was then shaken with a 20% piperidine solution in NMP (3 x 25 ml) for 12 minutes. The resin was then washed (2 x DMF, 2 x DCM, 2 x MeOH, 2 x DCM and MeOH alternately and then diethyl ether).
- Fmoc-Leu-OH (2.1 g, 5.3 mmol) was dissolved in a 10% solution of DIPEA in DMF (25 mL) before the addition of HATU (1.8 g, 4.8 mmol). The reaction mixture was allowed to stir for 15 mins after which time it was added to the resin and agitated for 2 h. The process was repeated and the resin was washed as before.
- The resin was then shaken with a 20% piperidine solution in NMP (3 x 25 ml) for 12 minutes. The resin was then washed (2 x DMF, 2 x DCM, 2 x MeOH, 2 x DCM and MeOH alternately and then diethyl ether).
- Fmoc-Phe-OH (1.9 g, 5.3 mmol) was dissolved in a 10% solution of DIPEA in DMF (25 mL) before the addition of HATU (1.8 g, 4.8 mmol). The reaction mixture was allowed to stir for 15 min after which time it was added to the resin and agitated for 2 h. The process was repeated and the resin was washed as before.
- The resin was then shaken with a 20% piperidine solution in NMP (3 x 25 ml) for 12 minutes. The resin was then washed (2 x DMF, 2 x DCM, 2 x MeOH, 2 x DCM and MeOH alternately and then diethyl ether).
- To the resin was added a 10% solution of DIPEA in DMF (25 mL) and isobutryl chloride (0.60 ml, 5.3 mmol). The suspension was agitated for 2 h before the resin was drained and washed as before.
- The resin was suspended in a 1:1 mixture of TFA and DCM (20 mL) for 1 h

without agitation. The resin was removed by filtration and the filtrate was concentrated under vacuum. The crude material was purified by HPLC to afford **11** (0.17 g, 31 %) as a white solid.

$^1\text{H}$  NMR (500 MHz,  $\text{CDCl}_3$ )  $\delta$  8.21 (s, 1H, NH), 7.62 (s, 2H, 2 x NH), 7.24 – 7.02 (m, 6H, ArCH, NH), 5.19 (app. q,  $J = 7.0$  Hz, 1H,  $\text{H}^1$ ), 4.82 (app. q,  $J = 7.8$  Hz, 1H,  $\text{H}^2$ ), 4.50 (app. t,  $J = 8.9$  Hz, 1H,  $\text{H}^3$ ), 3.34 – 3.26 (m, 1H, NCH), 3.20 – 3.12 (m, 1H, NCH), 3.07 – 2.98 (m, 2H,  $\text{PhCH}_2$ ), 2.48 (h,  $J = 6.8$  Hz, 1H,  $\text{HC}(\text{CH}_3)_2$ ), 2.13 – 2.05 (m, 1H,  $\text{HC}(\text{CH}_3)_2$ ), 1.70 – 1.54 (m, 3H,  $\text{CH}_2\text{CH}(\text{CH}_3)_2$ ,  $\text{CH}_2\text{CH}(\text{CH}_3)_2$ ), 1.54 – 1.46 (m, 2H,  $\text{CH}_3\text{CH}_2\text{CH}_2\text{CH}_2\text{NH}$ ), 1.34 (app. h,  $J = 7.3$  Hz, 2H,  $\text{CH}_3\text{CH}_2\text{CH}_2\text{CH}_2\text{NH}$ ), 1.06 (d,  $J = 7.0$  Hz, 3H,  $\text{CH}_3$ ), 1.04 (d,  $J = 7.1$  Hz, 3H,  $\text{CH}_3$ ), 0.97 (d,  $J = 6.7$  Hz, 3H,  $\text{CH}_3$ ), 0.94 (d,  $J = 6.8$  Hz, 3H,  $\text{CH}_3$ ), 0.91 (t,  $J = 7.4$  Hz, 3H,  $\text{CH}_3\text{CH}_2\text{CH}_2\text{CH}_2\text{NH}$ ), 0.87 (t,  $J = 6.3$  Hz, 6H, 2 x  $\text{CH}_3$ );  $^{13}\text{C}$  NMR (126 MHz,  $\text{CDCl}_3$ )  $\delta$  176.8 ( $\text{C}_q$ ), 172.0 ( $\text{C}_q$ ), 171.1 ( $\text{C}_q$ ), 136.6 ( $\text{C}_q$ ), 129.5 (ArCH), 128.1 (ArCH), 126.6 (ArCH), 58.8 (CH), 53.2 (CH), 51.6 (CH), 42.5 ( $\text{CH}_2$ ), 39.1 ( $\text{CH}_2$ ), 38.9 ( $\text{CH}_2$ ), 34.9 (CH), 31.5 ( $\text{CH}_2$ ), 31.0 (CH), 29.7 (CH), 24.8 ( $\text{CH}_3$ ), 22.6 ( $\text{CH}_3$ ), 20.11 ( $\text{CH}_2$ ), 19.7 ( $\text{CH}_3$ ), 19.2 ( $\text{CH}_3$ ), 19.1 ( $\text{CH}_3$ ), 18.6 ( $\text{CH}_3$ ), 13.7 ( $\text{CH}_3$ ); HRMS (ESI)  $[\text{M}+\text{H}]^+$  503.3577,  $\text{C}_{28}\text{H}_{46}\text{N}_4\text{O}_4$   $[\text{M}+\text{H}]^+$  requires 503.3592.

## 2. $^1\text{H}$ NMR Titration Data

### 2.1. Compound 1 Homodimer VT $^1\text{H}$ NMR Titration

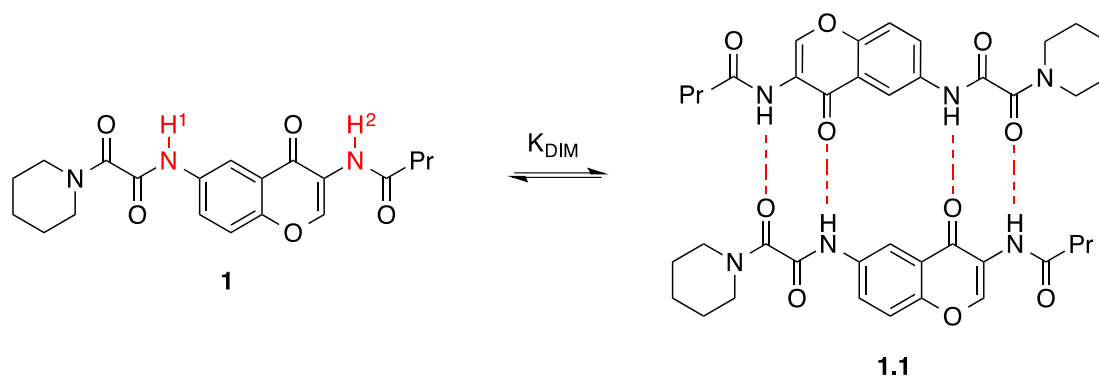

**Figure 1:** Homodimerisation of compound **1**. Resonances ( $\text{NH}^1$  and  $\text{NH}^2$ ) used to determine  $K_{\text{DIM}}$  are highlighted in red.

#### 2.1.1. Compound 1 Homodimer $^1\text{H}$ NMR Titration Experiment 1

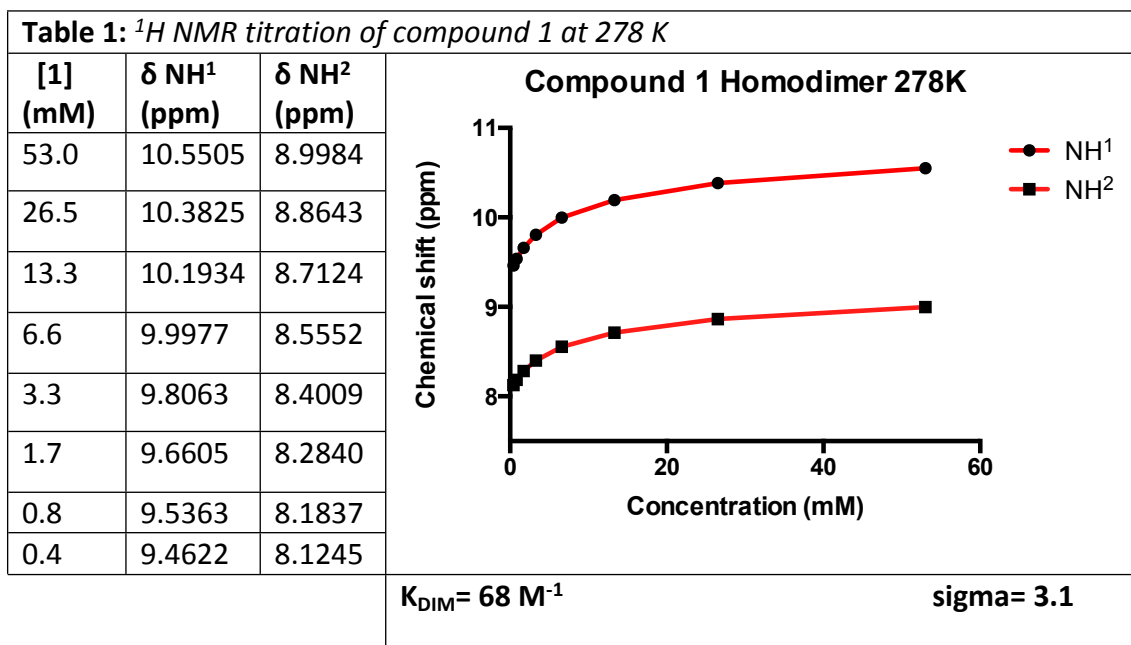

**Table 2:**  $^1\text{H}$  NMR titration of compound 1 at 288 K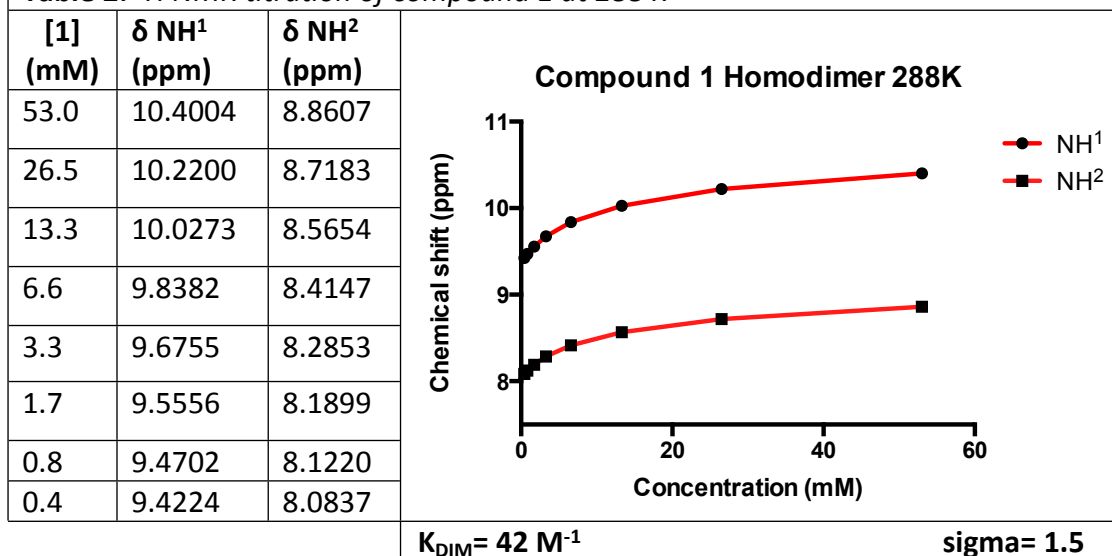**Table 3:**  $^1\text{H}$  NMR titration of compound 1 at 295 K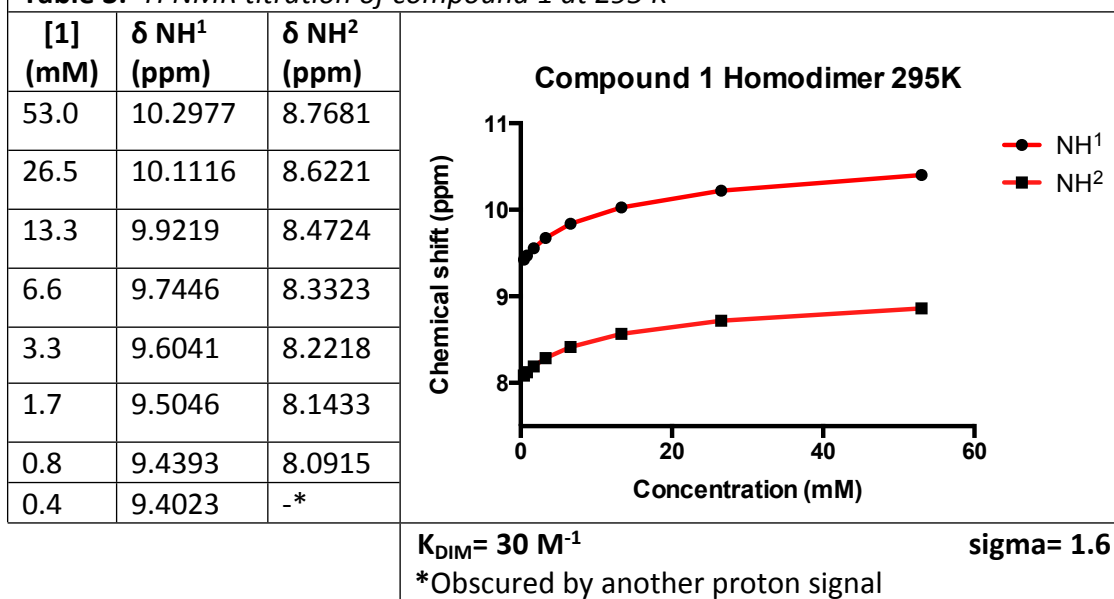

**Table 4:**  $^1\text{H}$  NMR titration of compound 1 at 298 K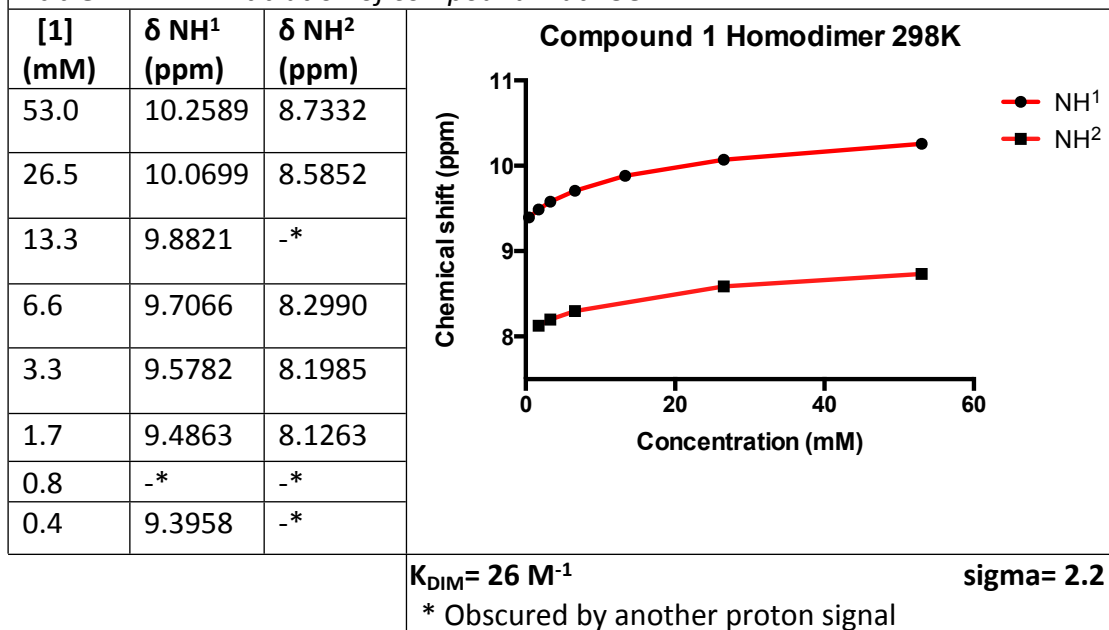**Table 5:**  $^1\text{H}$  NMR titration of compound 1 at 308 K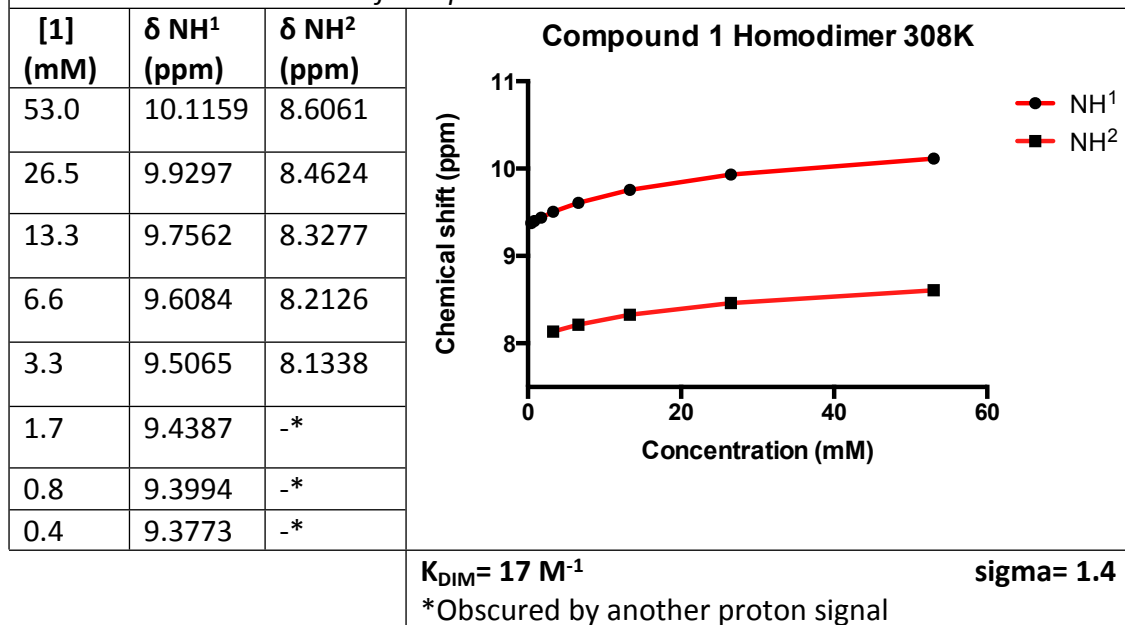



## 2.1.2. Compound 1 Homodimer <sup>1</sup>H NMR Titration Experiment 2

**Table 6:** <sup>1</sup>H NMR titration of compound 1 at 278 K

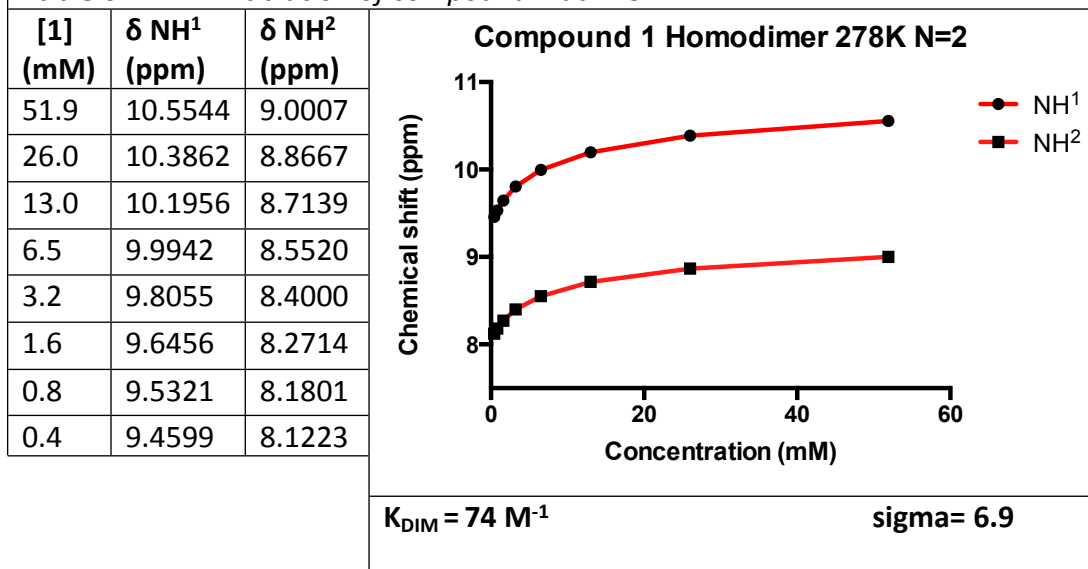

**Table 7:** <sup>1</sup>H NMR titration of compound 1 at 288 K

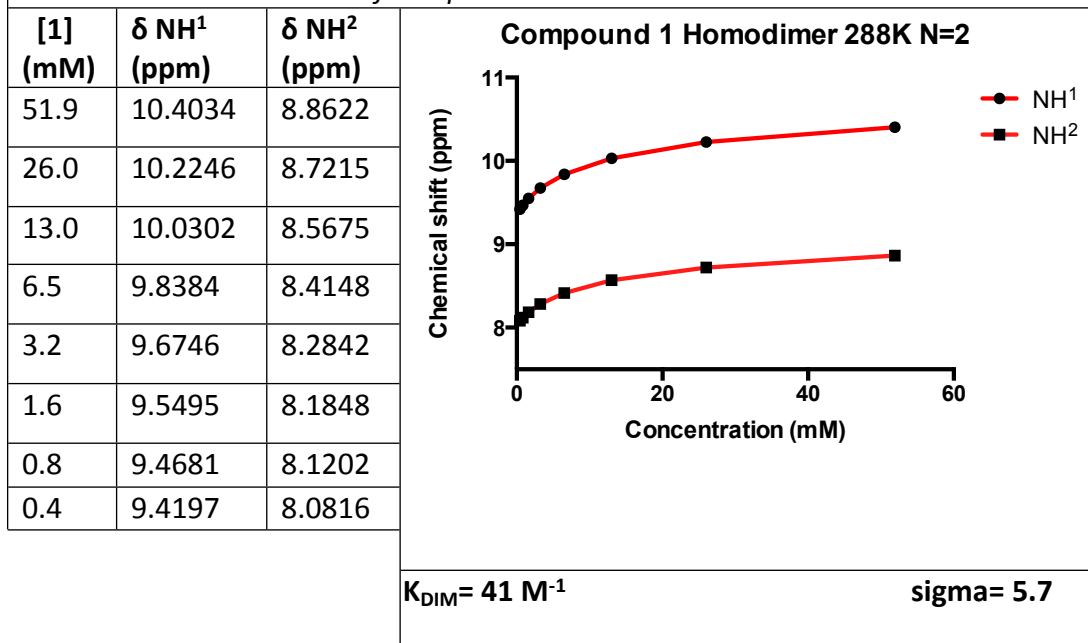

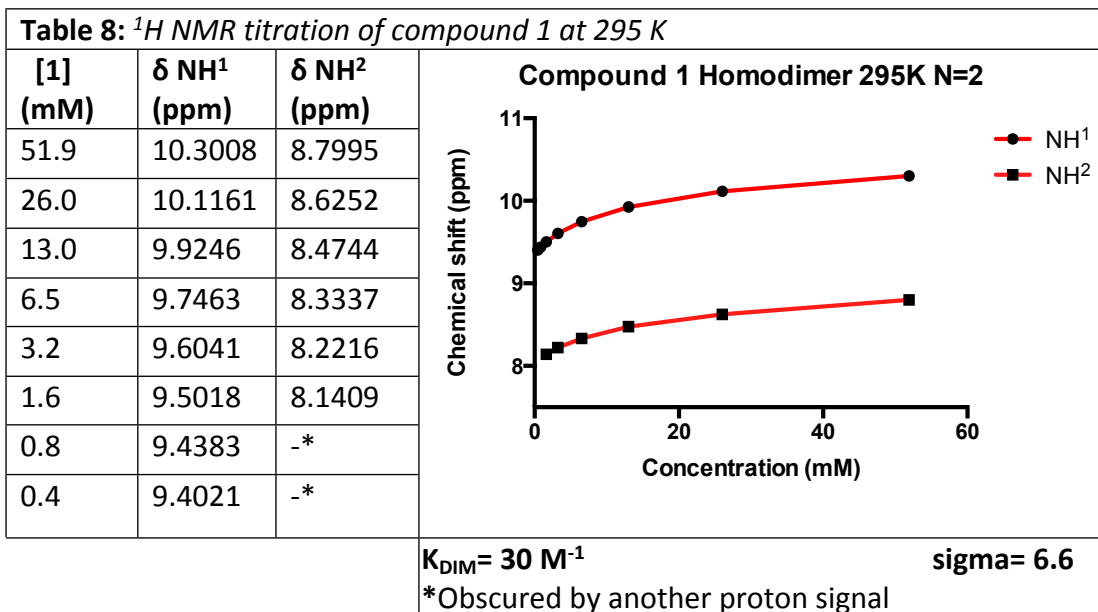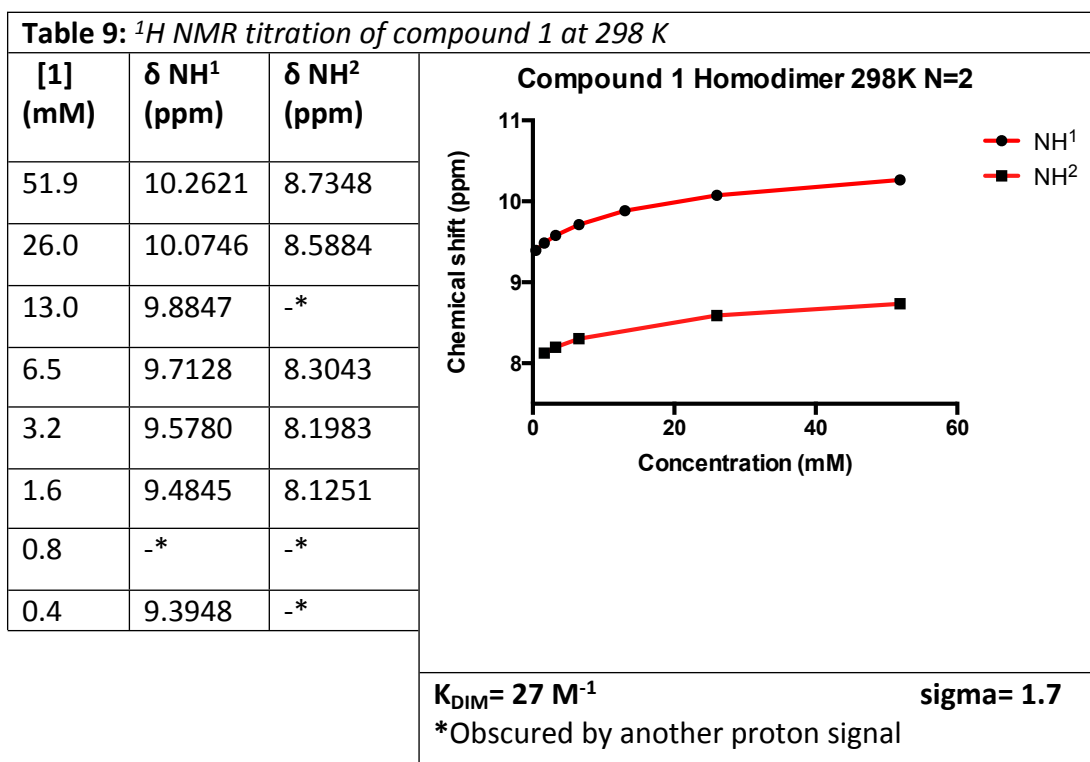

**Table 10:** <sup>1</sup>H NMR titration of compound 1 at 308 K

| [1]<br>(mM) | δ NH <sup>1</sup><br>(ppm) | δ NH <sup>2</sup><br>(ppm) |
|-------------|----------------------------|----------------------------|
| 51.9        | 10.1185                    | 8.6073                     |
| 26.0        | 9.9332                     | 8.4645                     |
| 13.0        | 9.7576                     | 8.3285                     |
| 6.5         | 9.6105                     | 8.2143                     |
| 3.2         | 9.5060                     | 8.1333                     |
| 1.6         | 9.4372                     | -*                         |
| 0.8         | 9.3981                     | -*                         |
| 0.4         | 9.3791                     | -*                         |

**Compound 1 Homodimer 308K N=2**

Chemical shift (ppm)

Concentration (mM)

● NH<sup>1</sup>  
■ NH<sup>2</sup>

$K_{DIM} = 18 \text{ M}^{-1}$   $\sigma = 1.2$

\*Obscured by another proton signal

### 2.1.3. Compound 1 Homodimer <sup>1</sup>H NMR Titration Experiment 3

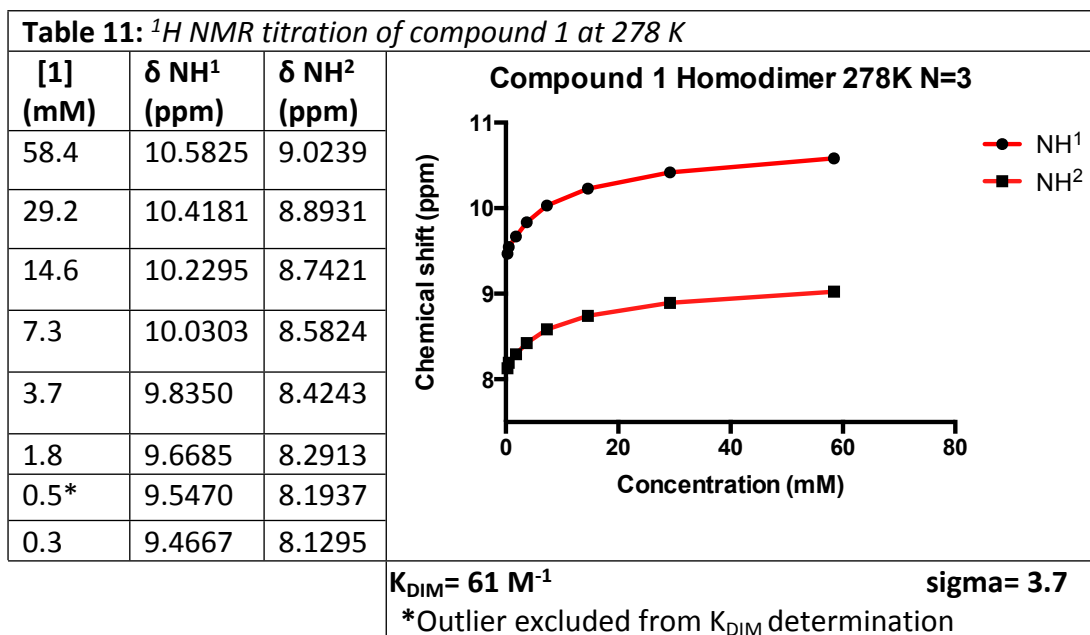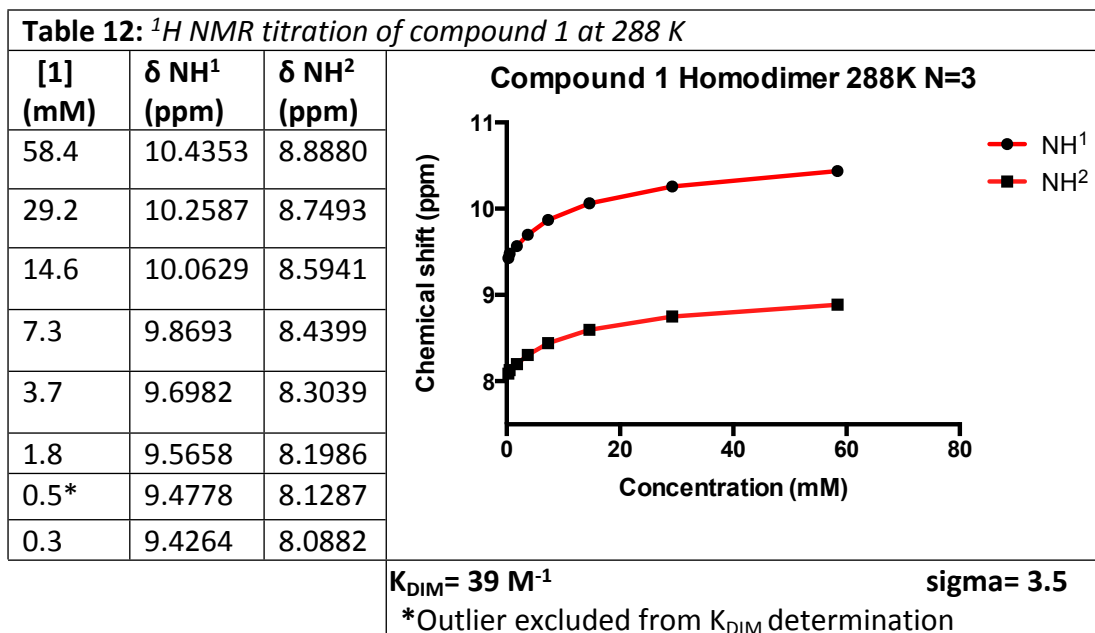

**Table 13:**  $^1\text{H}$  NMR titration of compound 1 at 295 K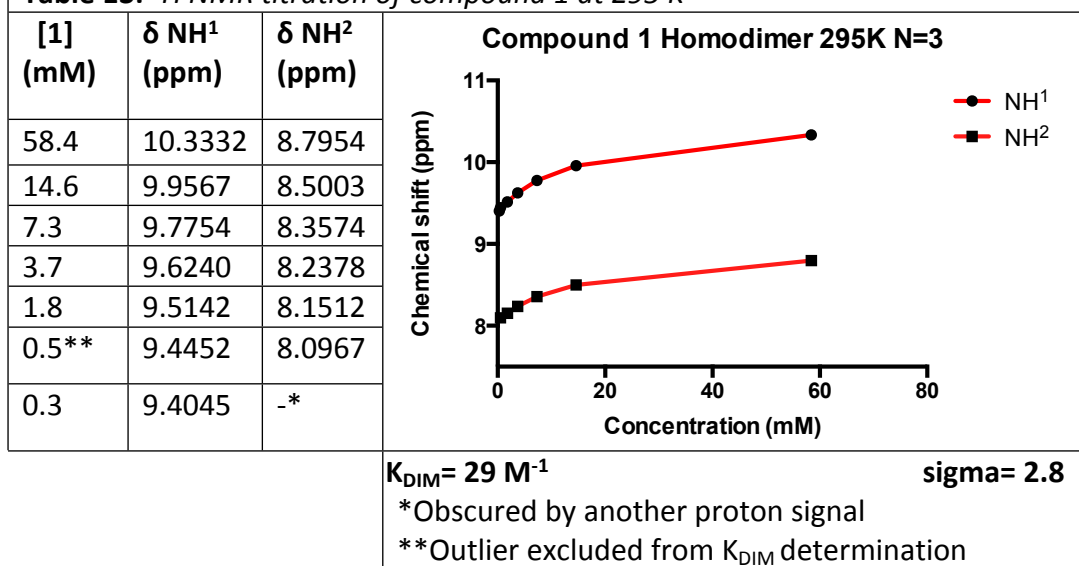**Table 14:**  $^1\text{H}$  NMR titration of compound 1 at 298 K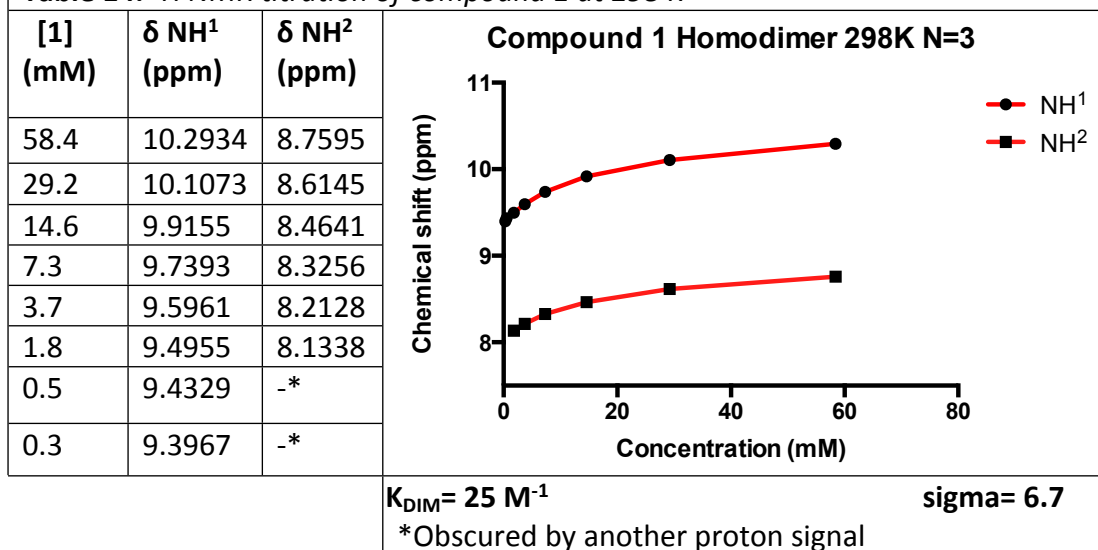

**Table 15:** <sup>1</sup>H NMR titration of compound 1 at 308 K

| [1]<br>(mM) | δ NH <sup>1</sup><br>(ppm) | δ NH <sup>2</sup><br>(ppm) |
|-------------|----------------------------|----------------------------|
| 58.4        | 10.1517                    | 8.6331                     |
| 29.2        | 9.9650                     | 8.4894                     |
| 14.6        | 9.7851                     | 8.3500                     |
| 7.3         | 9.6326                     | 8.2317                     |
| 3.7         | 9.5192                     | 8.1437                     |
| 1.8         | 9.4449                     | -*                         |
| 0.5         | 9.4020                     | -*                         |
| 0.3         | 9.3777                     | -*                         |

**Compound 1 Homodimer 308K N=3**

Chemical shift (ppm)

Concentration (mM)

● NH<sup>1</sup>  
■ NH<sup>2</sup>

$K_{\text{DIM}} = 17 \text{ M}^{-1}$        $\sigma = 5.0$   
\*Obscured by another proton signal

## 2.2.4. Compound 1 Homodimer VT <sup>1</sup>H NMR Summary and Van't Hoff Plots

Table 16: Summary of Compound 1 Homodimer Experiment 1 and Van't Hoff Plot

| Temp (K) | K <sub>DIM</sub> (M <sup>-1</sup> ) | 1/T         | ln(K <sub>DIM</sub> ) |
|----------|-------------------------------------|-------------|-----------------------|
| 278      | 73                                  | 0.003597122 | 4.290459441           |
| 288      | 45                                  | 0.003472222 | 3.80666249            |
| 295      | 30                                  | 0.003389831 | 3.401197382           |
| 298      | 26                                  | 0.003355705 | 3.258096538           |
| 308      | 18                                  | 0.003246753 | 2.890371758           |

Table 17: Summary of Compound 1 Homodimer Experiment 2 and Van't Hoff Plot

| Temp (K) | K <sub>DIM</sub> (M <sup>-1</sup> ) | 1/T         | ln(K <sub>DIM</sub> ) |
|----------|-------------------------------------|-------------|-----------------------|
| 278      | 74                                  | 0.003597122 | 4.304065093           |
| 288      | 41                                  | 0.003472222 | 3.713572067           |
| 295      | 30                                  | 0.003389831 | 3.401197382           |
| 298      | 27                                  | 0.003355705 | 3.295836866           |
| 308      | 18                                  | 0.003246753 | 2.890371758           |

Table 18: Summary of Compound 1 Homodimer Experiment 3 and Van't Hoff Plot

| Temp (K) | K <sub>DIM</sub> (M <sup>-1</sup> ) | 1/T         | ln(K <sub>DIM</sub> ) |
|----------|-------------------------------------|-------------|-----------------------|
| 278      | 61                                  | 0.003597122 | 4.110873864           |
| 288      | 39                                  | 0.003472222 | 3.663561646           |
| 295      | 29                                  | 0.003389831 | 3.36729583            |
| 298      | 25                                  | 0.003355705 | 3.218875825           |
| 308      | 17                                  | 0.003246753 | 2.833213344           |

Table 19: Summary of thermodynamic parameters for compound 1 homodimer

| Expt           | ΔH (kcal mol <sup>-1</sup> ) | -TΔS <sup>295 K</sup> (kcal mol <sup>-1</sup> ) | ΔG (kcal mol <sup>-1</sup> ) |
|----------------|------------------------------|-------------------------------------------------|------------------------------|
| 1              | -8.1                         | 6.1                                             | -2.0                         |
| 2              | -7.9                         | 6.0                                             | -1.9                         |
| 3              | -7.3                         | 5.3                                             | -2.0                         |
| <b>Average</b> | <b>-7.8</b>                  | <b>5.8</b>                                      | <b>-2.0</b>                  |

## 2.2. Tripeptide **11** Homodimer $^1\text{H}$ NMR Titration

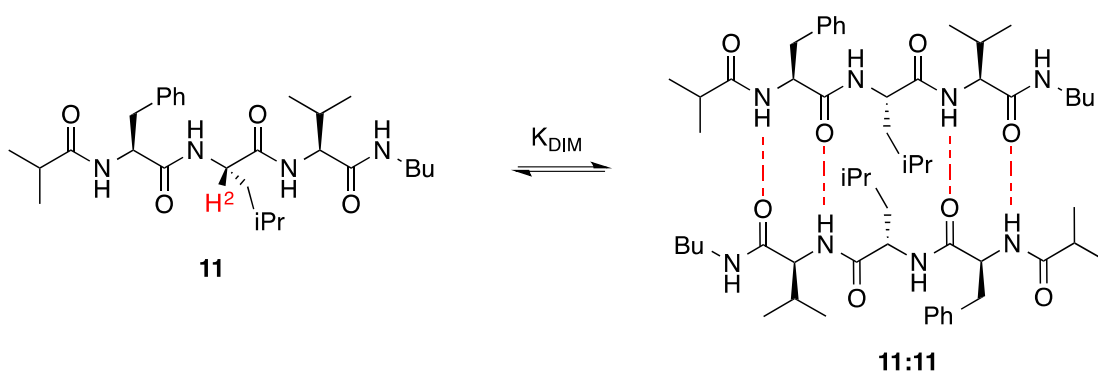

**Figure 2:** Homodimerisation of **11**. Resonance ( $\text{H}^2$ ) used to determine  $K_{DIM}$  is highlighted in red

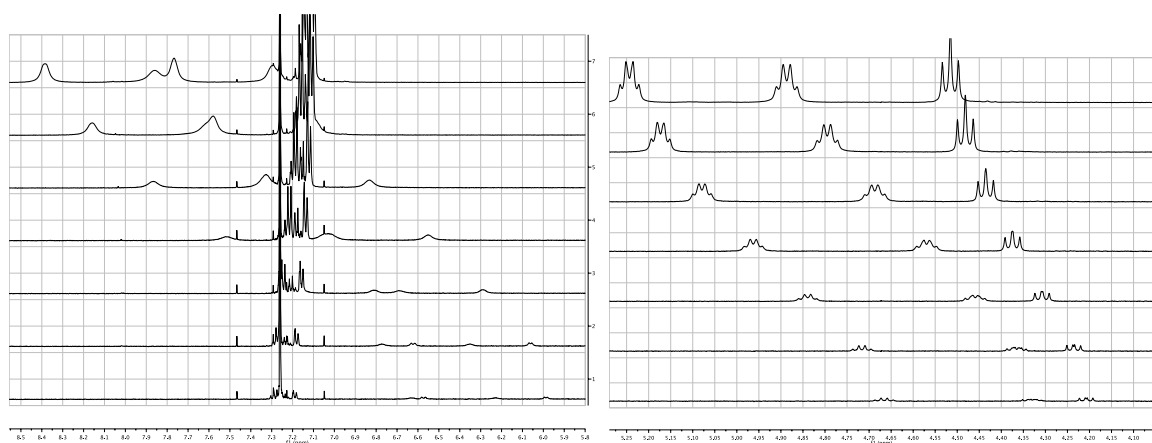

**Figure 3:** Comparison between NH shifts (left) and  $\alpha\text{CH}$  shifts (right) of compound **11**. NH signals broaden into the baseline at lower concentrations making it difficult to accurately measure chemical shift.  $\alpha\text{CH}$  signals are relatively sharp compared to NH signals and therefore were used to determine binding constants



## 2.2.1 Compound 11 Homodimer $^1\text{H}$ NMR Titration Experiment 1

**Table 20:**  $^1\text{H}$  NMR titration of compound 11 at 278 K

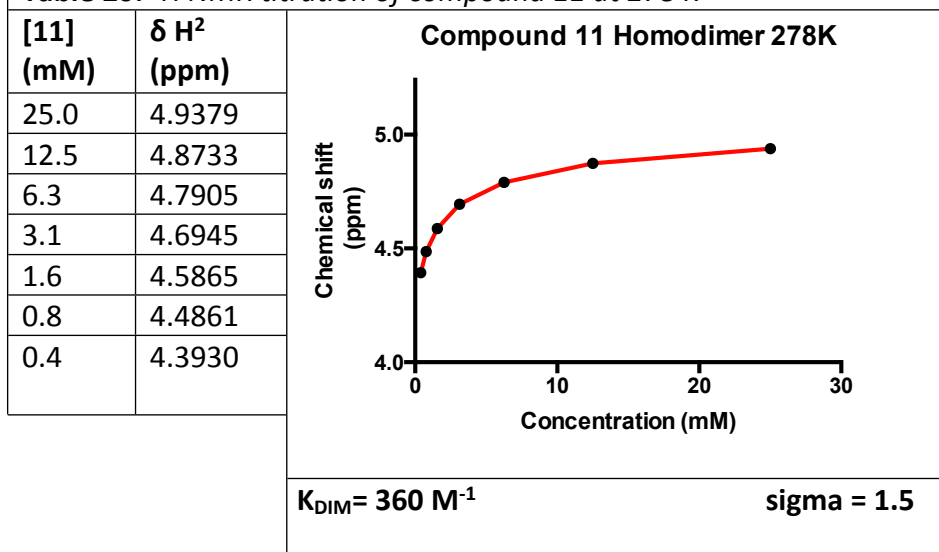

**Table 21:**  $^1\text{H}$  NMR titration of compound 11 at 288 K

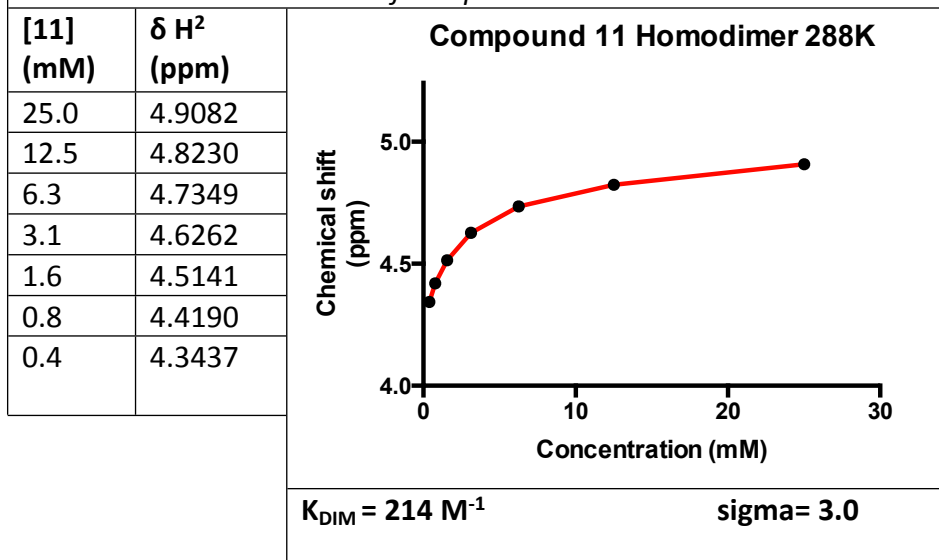

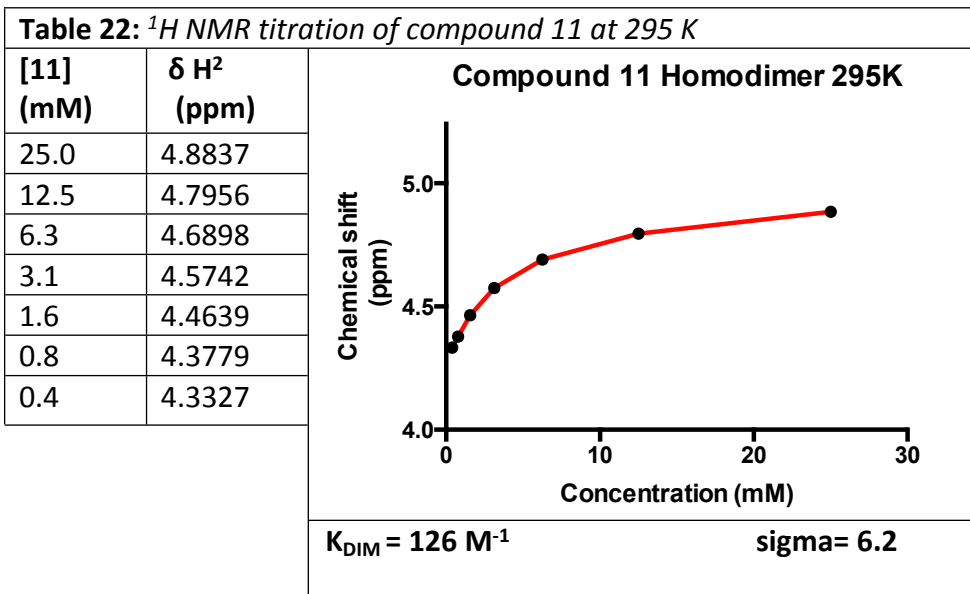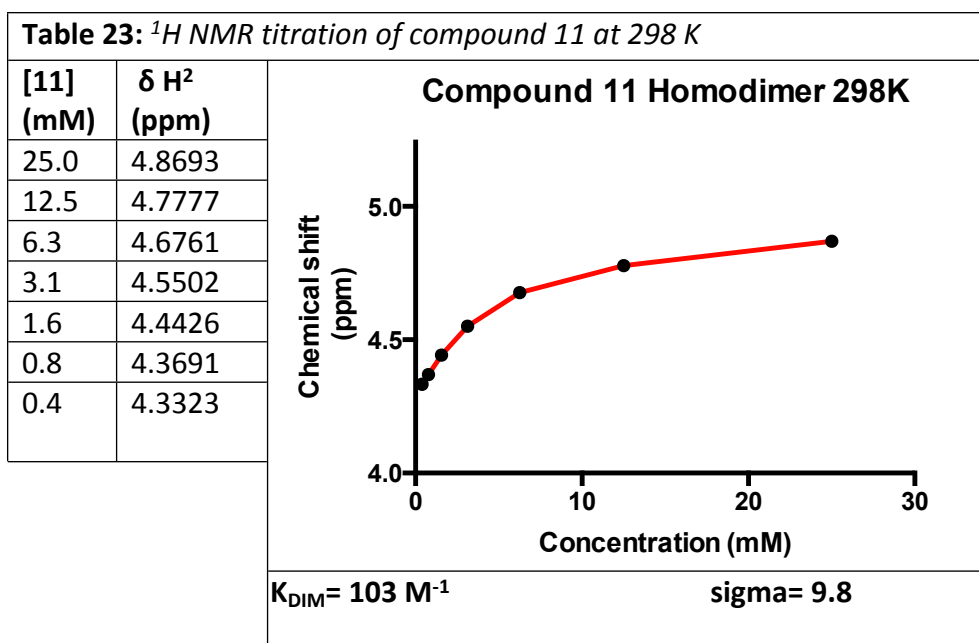

**Table 24:**  $^1\text{H}$  NMR titration of compound 11 at 308 K

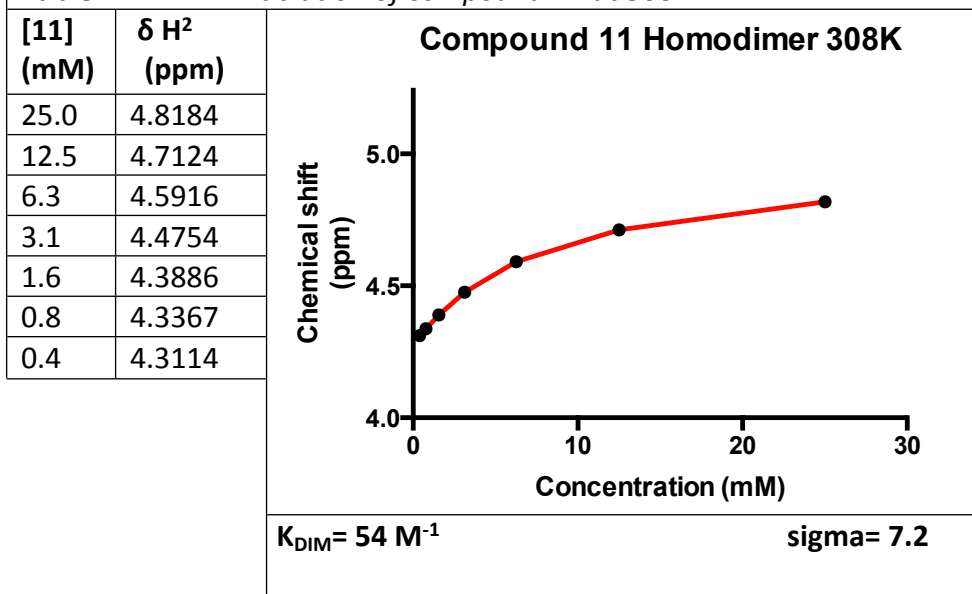

## 2.2.2. Compound 11 Homodimer $^1\text{H}$ NMR Titration Experiment 2

**Table 25:**  $^1\text{H}$  NMR titration of compound 11 at 278 K

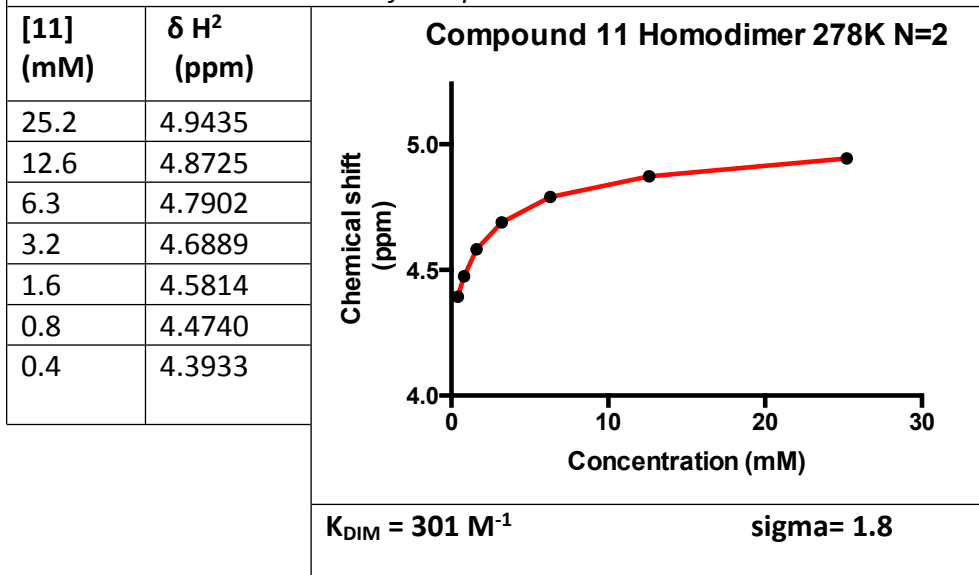

**Table 26:**  $^1\text{H}$  NMR titration of compound 11 at 295 K

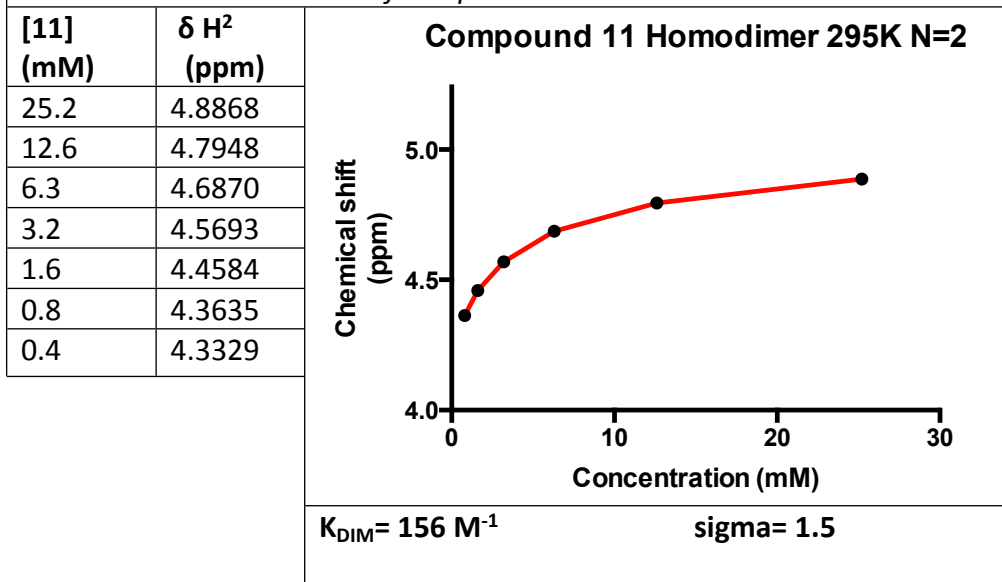

**Table 27:**  $^1\text{H}$  NMR titration of compound 11 at 298 K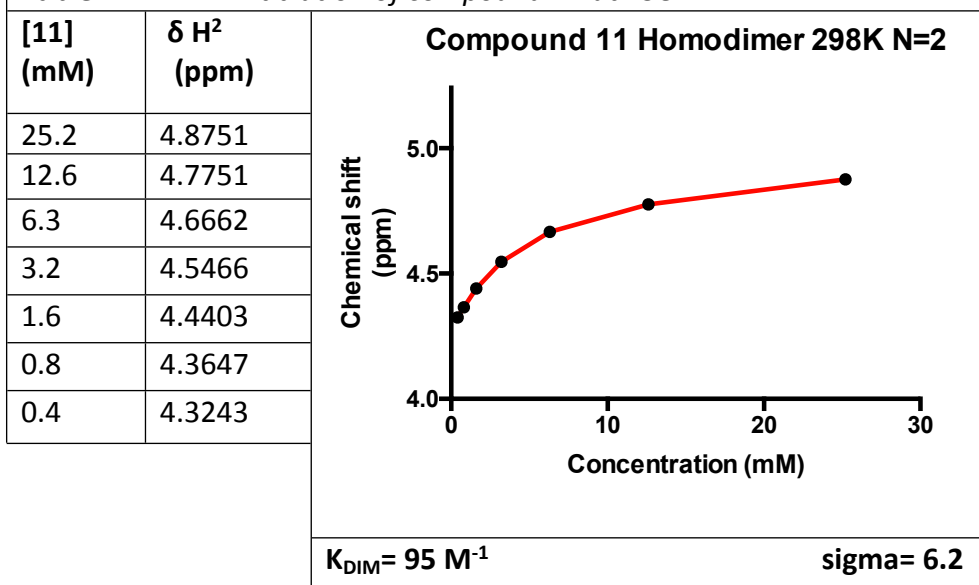**Table 28:**  $^1\text{H}$  NMR titration of compound 11 at 308 K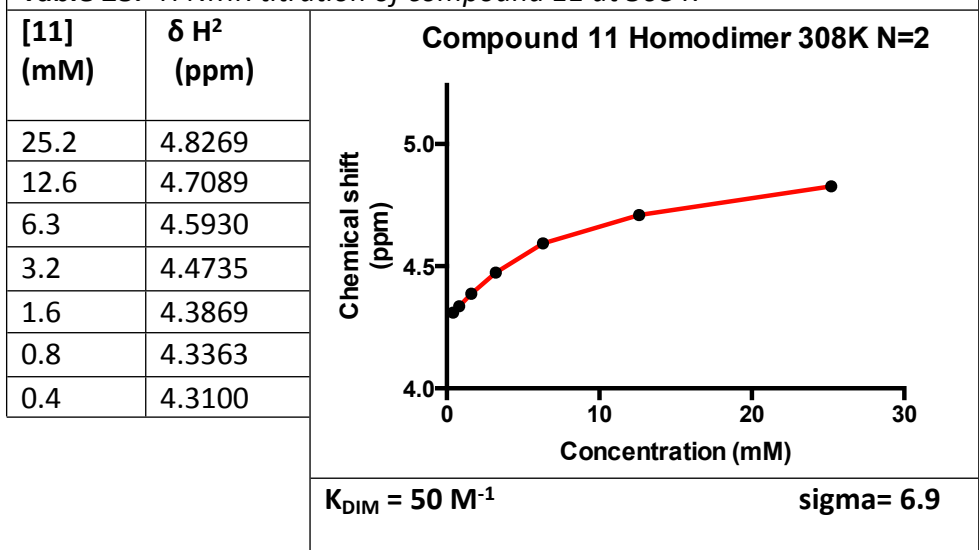

### 2.2.3. Compound 11 Homodimer $^1\text{H}$ NMR Titration Experiment 3

**Table 29:**  $^1\text{H}$  NMR titration of compound 11 at 278 K

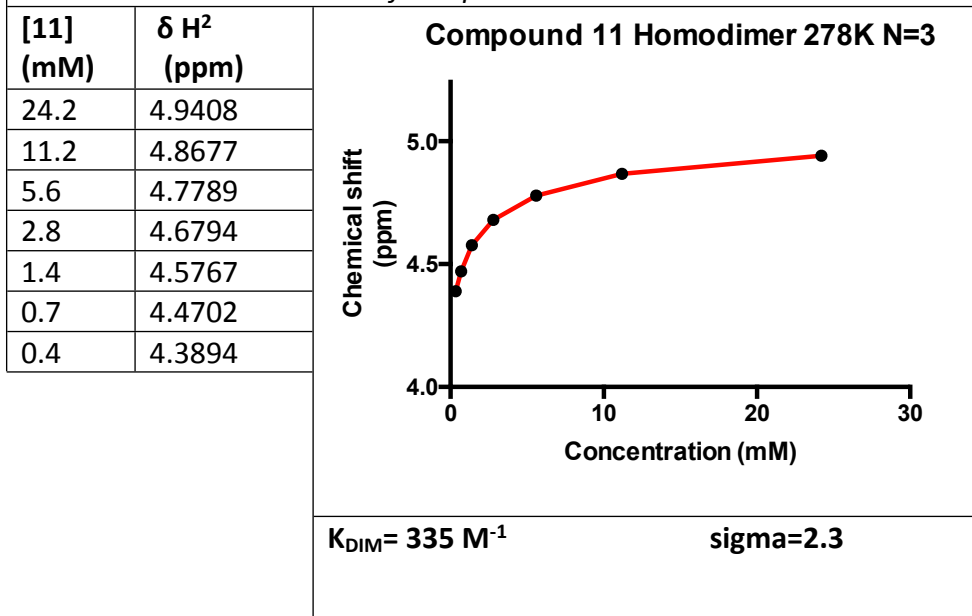

**Table 30:**  $^1\text{H}$  NMR titration of compound 11 at 288 K

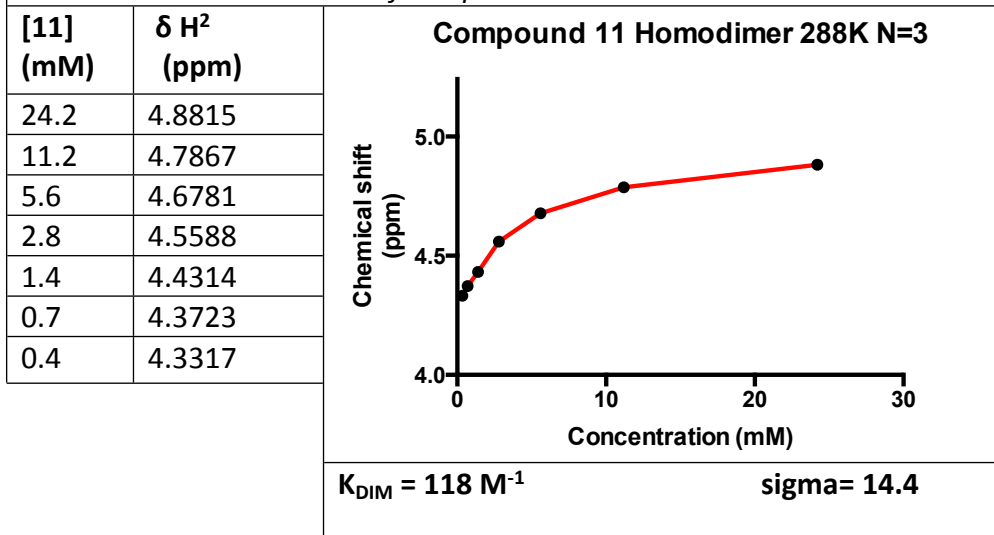

**Table 31:**  $^1\text{H}$  NMR titration of compound 11 at 298 K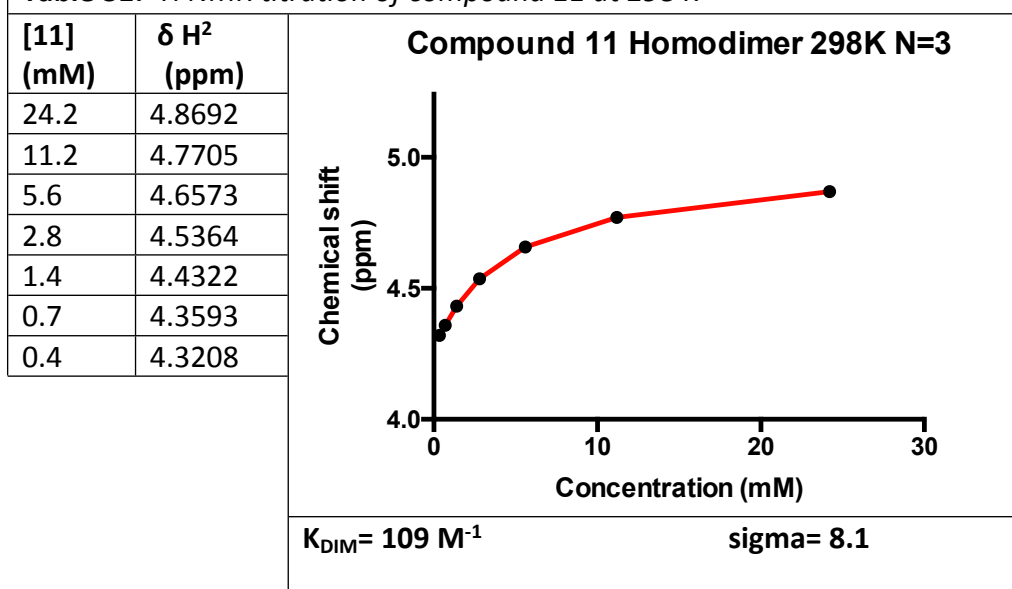**Table 32:**  $^1\text{H}$  NMR titration of compound 11 at 308 K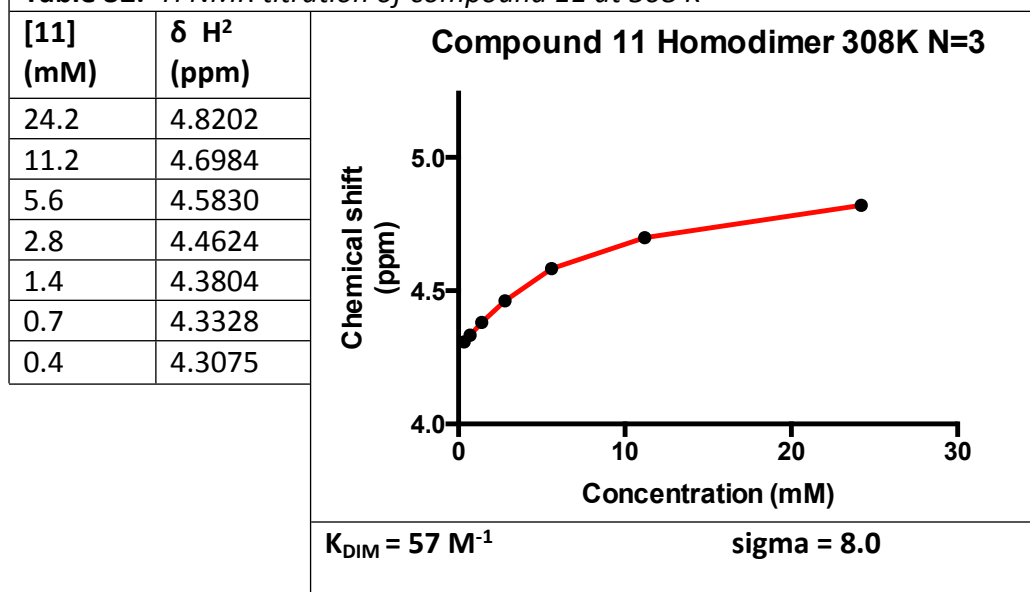

## 2.2.4. Compound 11 Homodimer VT <sup>1</sup>H NMR Summary and Van't Hoff Plots

**Table 33:** Summary of compound 11 Homodimer Experiment 1 and Van't Hoff Plot

| Temp (K) | K <sub>DIM</sub> (M <sup>-1</sup> ) | 1/T         | ln(K <sub>DIM</sub> ) |
|----------|-------------------------------------|-------------|-----------------------|
| 308      | 54                                  | 0.003246753 | 3.988984047           |
| 298      | 110                                 | 0.003355705 | 4.700480366           |
| 295      | 126                                 | 0.003389831 | 4.836281907           |
| 288      | 214                                 | 0.003472222 | 5.365976015           |
| 278      | 360                                 | 0.003597122 | 5.886104031           |

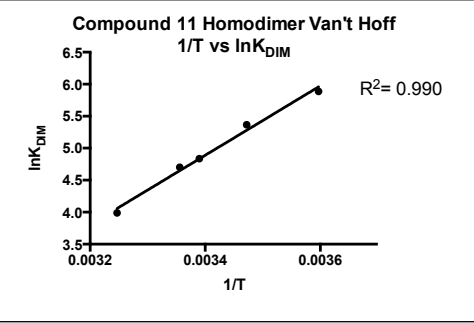

**Table 34:** Summary of compound 11 Homodimer Experiment 2 and Van't Hoff Plot

| Temp (K) | K <sub>DIM</sub> (M <sup>-1</sup> ) | 1/T         | ln(K <sub>DIM</sub> ) |
|----------|-------------------------------------|-------------|-----------------------|
| 308      | 57                                  | 0.003246753 | 4.043051268           |
| 298      | 109                                 | 0.003355705 | 4.691347882           |
| 295      | 118                                 | 0.003389831 | 4.770684624           |
| 278      | 335                                 | 0.003597122 | 5.814130532           |

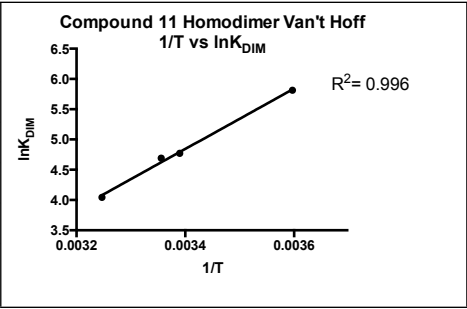

**Table 35:** Summary of compound 11 Homodimer Experiment 3 and Van't Hoff Plot

| Temp (K) | K <sub>DIM</sub> (M <sup>-1</sup> ) | 1/T         | ln(K <sub>DIM</sub> ) |
|----------|-------------------------------------|-------------|-----------------------|
| 308      | 50                                  | 0.003246753 | 3.912023005           |
| 298      | 95                                  | 0.003355705 | 4.553876892           |
| 295      | 156                                 | 0.003389831 | 5.049856007           |
| 278      | 301                                 | 0.003597122 | 5.707110265           |

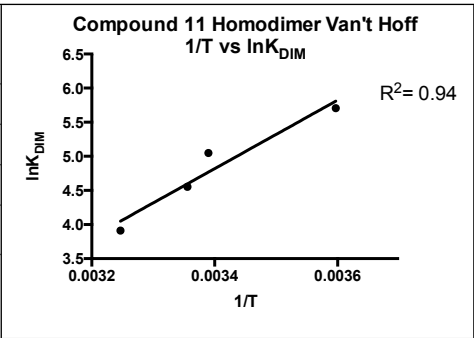

**Table 36:** Summary of thermodynamic parameters for compound 11 homodimer

| Expt           | ΔH (kcal mol <sup>-1</sup> ) | -TΔS <sup>295 K</sup> (kcal mol <sup>-1</sup> ) | ΔG (kcal mol <sup>-1</sup> ) |
|----------------|------------------------------|-------------------------------------------------|------------------------------|
| 1              | -10.8                        | 7.9                                             | -2.9                         |
| 2              | -10.0                        | 7.2                                             | -2.8                         |
| 3              | -9.9                         | 7.1                                             | -2.8                         |
| <b>Average</b> | <b>-10.2</b>                 | <b>7.4</b>                                      | <b>-2.8</b>                  |



## 2.3. Compound 2 Homodimer VT <sup>1</sup>H NMR Titration

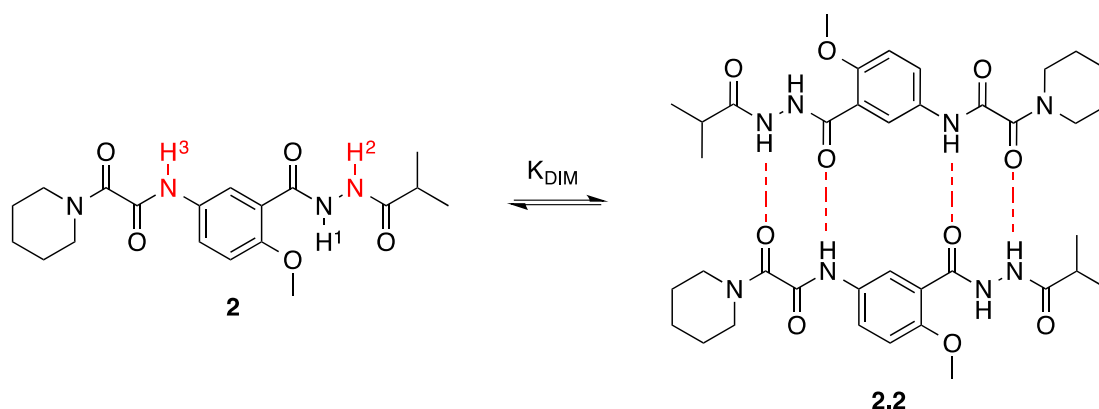

**Figure 4:** Homodimerisation of HAO. Resonances used to calculate  $K_{DIM}$  are highlighted in red.

**N.B.**  $K_{DIM}$  was calculated using  $NH^2$  and  $NH^3$ . The shifts of  $NH^1$  are included for completeness.

### 2.3.1. Compound 2 Homodimer <sup>1</sup>H NMR Titration Experiment 1

| [2]<br>(mM) | $\delta$ NH <sup>1</sup><br>(ppm) | $\delta$ NH <sup>2</sup><br>(ppm) | $\delta$ NH <sup>3</sup><br>(ppm) |
|-------------|-----------------------------------|-----------------------------------|-----------------------------------|
| 51.4        | 11.4178                           | 11.2621                           | 10.8163                           |
| 25.7        | 11.4094                           | 11.2182                           | 10.7872                           |
| 12.9        | 11.3964                           | 11.1572                           | 10.7457                           |
| 6.4         | 11.3771                           | 11.0726                           | 10.6876                           |
| 3.2         | 11.3507                           | 10.9579                           | 10.6093                           |
| 1.6         | 11.3160                           | 10.8086                           | 10.5055                           |
| 0.8         | 11.2709                           | 10.6180                           | 10.3733                           |
| 0.4         | 11.2163                           | 10.3790                           | 10.2100                           |

**Compound 2 Homodimer 278K**

$K_{DIM} = 4747 \text{ M}^{-1}$

$\sigma = 0.8$

**Table 38:**  $^1\text{H}$  NMR titration of 2 at 288 K

| [2]<br>(mM) | $\delta$ NH <sup>1</sup><br>(ppm) | $\delta$ NH <sup>2</sup><br>(ppm) | $\delta$ NH <sup>3</sup><br>(ppm) |
|-------------|-----------------------------------|-----------------------------------|-----------------------------------|
| 51.4        | 11.3713                           | 11.1460                           | 10.7535                           |
| 25.7        | 11.3594                           | 11.0851                           | 10.7122                           |
| 12.9        | 11.3405                           | 10.9994                           | 10.6540                           |
| 6.4         | 11.3135                           | 10.8831                           | 10.5742                           |
| 3.2         | 11.2780                           | 10.7310                           | 10.4699                           |
| 1.6         | 11.2315                           | 10.5340                           | 10.3346                           |
| 0.8         | 11.1741                           | 10.2938                           | 10.1696                           |
| 0.4         | 11.1086                           | -*                                | 9.9778                            |

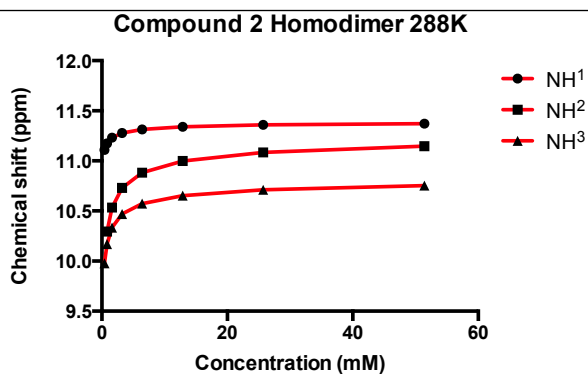 $K_{\text{DIM}}=2352 \text{ M}^{-1}$ 

sigma= 0.6

\*Obscured by another proton signal

**Table 39:**  $^1\text{H}$  NMR titration of 2 at 295 K

| [2]<br>(mM) | $\delta$ NH <sup>1</sup><br>(ppm) | $\delta$ NH <sup>2</sup><br>(ppm) | $\delta$ NH <sup>3</sup><br>(ppm) |
|-------------|-----------------------------------|-----------------------------------|-----------------------------------|
| 51.4        | 11.3377                           | 11.0589                           | 10.7046                           |
| 25.7        | 11.3223                           | 10.9828                           | 10.6531                           |
| 12.9        | 11.2978                           | 10.8756                           | 10.5801                           |
| 6.4         | 11.2652                           | 10.7356                           | 10.4841                           |
| 3.2         | 11.2226                           | 10.5555                           | 10.3606                           |
| 1.6         | 11.1678                           | 10.3256                           | 10.2035                           |
| 0.8         | 11.1029                           | -*                                | 10.0209                           |
| 0.4         | 11.0338                           | 9.7735                            | 9.8217                            |

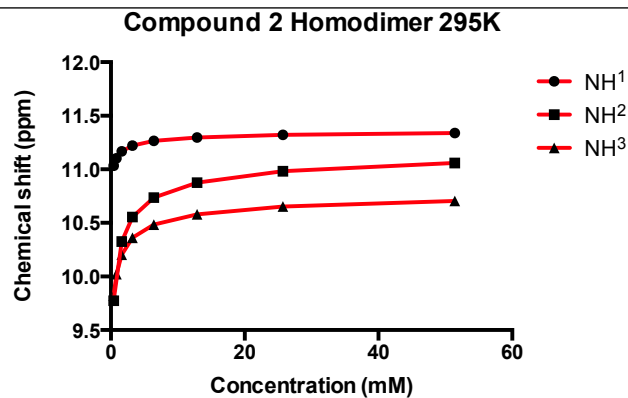 $K_{\text{DIM}}= 1360 \text{ M}^{-1}$ 

sigma= 1.4

\*Obscured by another proton signal

**Table 40:**  $^1\text{H}$  NMR titration of 2 at 298 K

| [2]<br>(mM) | $\delta$ NH <sup>1</sup><br>(ppm) | $\delta$ NH <sup>2</sup><br>(ppm) | $\delta$ NH <sup>3</sup><br>(ppm) |
|-------------|-----------------------------------|-----------------------------------|-----------------------------------|
| 51.4        | 11.3230                           | 11.0216                           | 10.6830                           |
| 25.7        | 11.3054                           | 10.9370                           | 10.6259                           |
| 12.9        | 11.2792                           | 10.8217                           | 10.5475                           |
| 6.4         | 11.2433                           | 10.6697                           | 10.4433                           |
| 3.2         | 11.1964                           | 10.4738                           | 10.3092                           |
| 1.6         | 11.1683                           | 10.2641                           | 10.1745                           |
| 0.8**       | 11.0725                           | -*                                | 9.9582                            |
| 0.4**       | 11.0025                           | 9.7570                            | 9.6655                            |

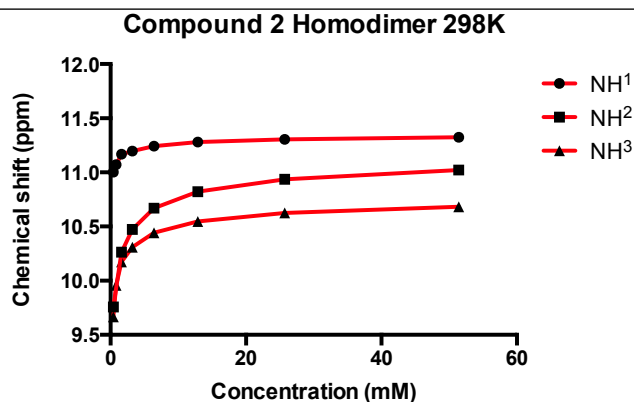 $K_{\text{DIM}} = 577 \text{ M}^{-1}$ 

sigma = 4.6

\* Obscured by another proton signal

\*\* Outlier excluded from  $K_{\text{DIM}}$  determination**Table 41:**  $^1\text{H}$  NMR titration of 2 at 308 K

| [2]<br>(mM) | $\delta$ NH <sup>1</sup><br>(ppm) | $\delta$ NH <sup>2</sup><br>(ppm) | $\delta$ NH <sup>3</sup><br>(ppm) |
|-------------|-----------------------------------|-----------------------------------|-----------------------------------|
| 51.4        | 11.2662                           | 10.8737                           | 10.5953                           |
| 25.7        | 11.2422                           | 10.7626                           | 10.5203                           |
| 12.9        | 11.2078                           | 10.6146                           | 10.4197                           |
| 6.4         | 11.1620                           | 10.4244                           | 10.2895                           |
| 3.2         | 11.1049                           | 10.1903                           | 10.1294                           |
| 1.6         | 11.0387                           | 9.9437                            | 9.9191                            |
| 0.8         | 10.9681                           | 9.6337                            | 9.7483                            |
| 0.4         | 10.9020                           | 9.3610                            | 9.5624                            |

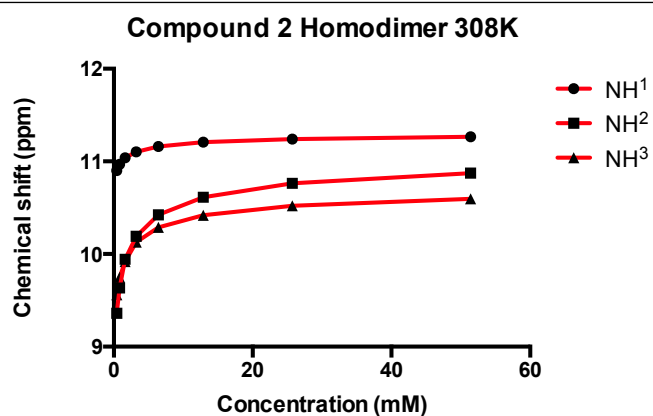 $K_{\text{DIM}} = 571 \text{ M}^{-1}$ 

sigma = 0.6

### 2.3.2. Compound 2 Homodimer <sup>1</sup>H NMR Titration Experiment 2

**Table 42:** <sup>1</sup>H NMR titration of 2 at 278 K

| [2]<br>(mM) | δ NH <sup>1</sup><br>(ppm) | δ NH <sup>2</sup><br>(ppm) | δ NH <sup>3</sup><br>(ppm) |
|-------------|----------------------------|----------------------------|----------------------------|
| 52.1        | 11.4121                    | 11.2452                    | 10.8046                    |
| 26.1        | 11.4039                    | 11.2003                    | 10.7743                    |
| 13.0        | 11.3902                    | 11.1365                    | 10.7304                    |
| 6.5         | 11.3698                    | 11.0464                    | 10.6686                    |
| 3.3         | 11.3420                    | 10.9203                    | 10.5852                    |
| 1.6         | 11.3055                    | 10.7661                    | 10.4761                    |
| 0.8         | 11.2578                    | 10.5585                    | 10.3345                    |
| 0.4         | 11.2006                    | 10.305                     | 10.1648                    |

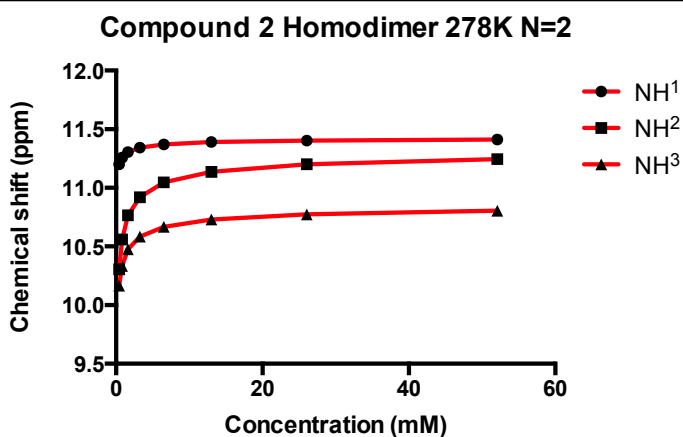

$K_{DIM} = 4928 \text{ M}^{-1}$

sigma= 1.9

**Table 43:** <sup>1</sup>H NMR titration of 2 at 288 K

| [2]<br>(mM) | δ NH <sup>1</sup><br>(ppm) | δ NH <sup>2</sup><br>(ppm) | δ NH <sup>3</sup><br>(ppm) |
|-------------|----------------------------|----------------------------|----------------------------|
| 52.1        | 11.3671                    | 11.1300                    | 10.7419                    |
| 26.1        | 11.3550                    | 11.0668                    | 10.6991                    |
| 13.0        | 11.3340                    | 10.9757                    | 10.6364                    |
| 6.5         | 11.3059                    | 10.8535                    | 10.5530                    |
| 3.3         | 11.2683                    | 10.6931                    | 10.4426                    |
| 1.6         | 11.2203                    | 10.4852                    | 10.3020                    |
| 0.8         | 11.1608                    | 10.2394                    | 10.1289                    |
| 0.4         | 11.0945                    | 9.9384                     | 9.9384                     |

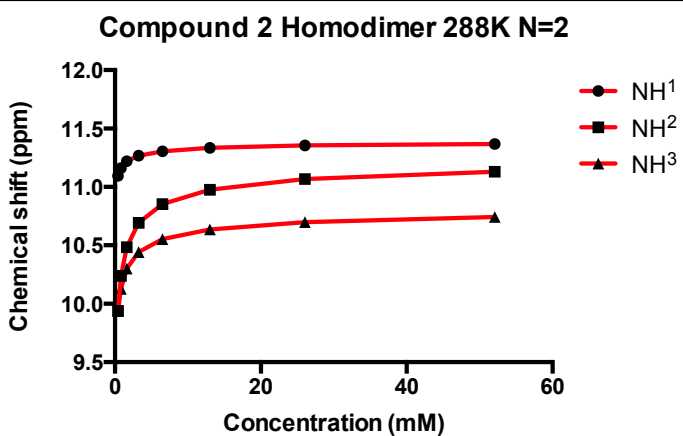

$K_{DIM} = 2262 \text{ M}^{-1}$

sigma= 3.3

**Table 44:** <sup>1</sup>H NMR titration of 2 at 295 K

| [2]<br>(mM) | δ NH <sup>1</sup><br>(ppm) | δ NH <sup>2</sup><br>(ppm) | δ NH <sup>3</sup><br>(ppm) |
|-------------|----------------------------|----------------------------|----------------------------|
| 52.1        | 11.3341                    | 11.0446                    | 10.6934                    |
| 26.1        | 11.3175                    | 10.9638                    | 10.6389                    |
| 13.0        | 11.2922                    | 10.8523                    | 10.5628                    |
| 6.5         | 11.2333                    | 10.6310                    | 10.4159                    |
| 3.3         | 11.2113                    | 10.5106                    | 10.3291                    |
| 1.6         | 11.1547                    | 10.2709                    | 10.1667                    |
| 0.8         | 11.0880                    | -*                         | 9.9777                     |
| 0.4         | 11.0174                    | 9.699                      | 9.7735                     |

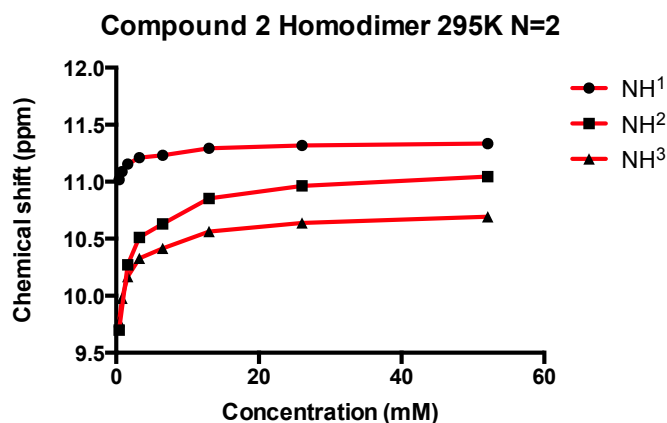

$$K_{\text{DIM}} = 1271 \text{ M}^{-1}$$

$$\text{sigma} = 1.4$$

N.B. Based on NH<sup>3</sup> only

\*Obscured by another proton signal

**Table 45:** <sup>1</sup>H NMR titration of 2 at 298 K

| [2]<br>(mM) | δ NH <sup>1</sup><br>(ppm) | δ NH <sup>2</sup><br>(ppm) | δ NH <sup>3</sup><br>(ppm) |
|-------------|----------------------------|----------------------------|----------------------------|
| 52.1        | 11.3175                    | 11.0021                    | 10.6684                    |
| 26.1        | 11.2995                    | 10.9140                    | 10.6093                    |
| 13.0        | 11.2717                    | 10.7929                    | 10.5265                    |
| 6.5         | 11.2339                    | 10.6332                    | 10.4174                    |
| 3.3         | 11.1855                    | 10.4296                    | 10.2780                    |
| 1.6         | 11.1259                    | 10.182                     | 10.1082                    |
| 0.8         | 11.0577                    | -*                         | 9.9120                     |
| 0.4         | 10.9879                    | 9.6042                     | 9.7140                     |

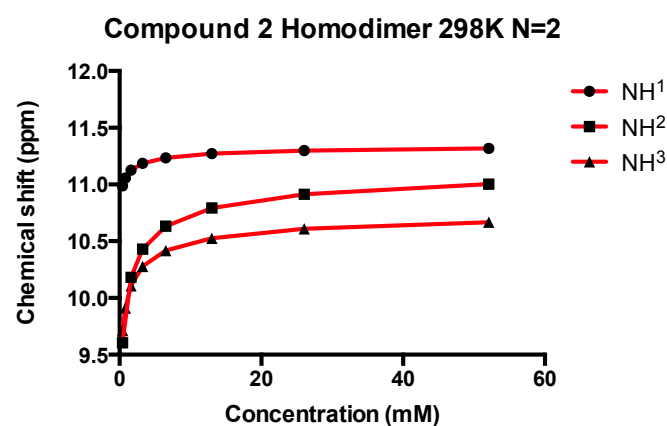

$$K_{\text{DIM}} = 1009 \text{ M}^{-1}$$

$$\text{sigma} = 0.9$$

\*Obscured by another proton signal

**Table 46:**  $^1\text{H}$  NMR titration of 2 at 308 K

| [2]<br>(mM) | $\delta$ NH <sup>1</sup><br>(ppm) | $\delta$ NH <sup>2</sup><br>(ppm) | $\delta$ NH <sup>3</sup><br>(ppm) |
|-------------|-----------------------------------|-----------------------------------|-----------------------------------|
| 52.1        | 11.2611                           | 10.8531                           | 10.5799                           |
| 26.1        | 11.2356                           | 10.7363                           | 10.5012                           |
| 13.0        | 11.1992                           | 10.5810                           | 10.3954                           |
| 6.5         | 11.1505                           | 10.3800                           | 10.2582                           |
| 3.3         | 11.0918                           | 10.1382                           | 10.0929                           |
| 1.6         | 11.0235                           | 9.8602                            | 9.9022                            |
| 0.8         | 10.9531                           | 9.5699                            | 9.7030                            |
| 0.4         | 10.8861                           | 9.301                             | 9.5194                            |

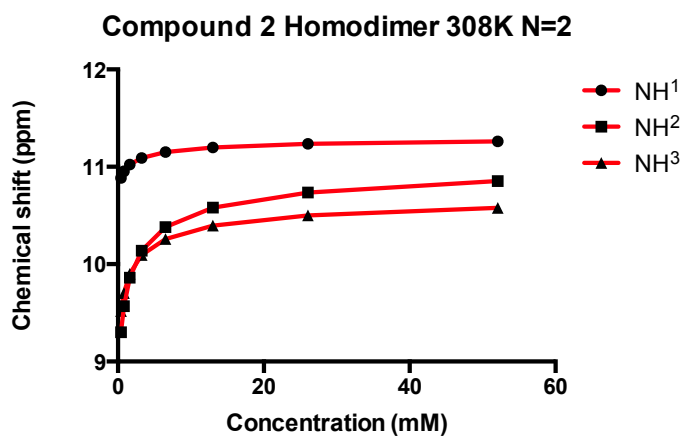 $K_{\text{DIM}} = 502 \text{ M}^{-1}$ 

sigma= 1.0

### 2.3.3. Compound 2 Homodimer <sup>1</sup>H NMR Titration Experiment 3

**Table 47:** <sup>1</sup>H NMR titration of 2 at 278 K

| [2]<br>(mM) | δ NH <sup>1</sup><br>(ppm) | δ NH <sup>2</sup><br>(ppm) | δ NH <sup>3</sup><br>(ppm) |
|-------------|----------------------------|----------------------------|----------------------------|
| 54.2        | 11.4141                    | 11.2535                    | 10.8103                    |
| 27.1        | 11.4077                    | 11.2146                    | 10.7847                    |
| 13.6        | 11.3951                    | 11.1539                    | 10.7440                    |
| 6.8         | 11.3772                    | 11.0729                    | 10.6890                    |
| 3.4         | 11.3520                    | 10.9635                    | 10.6132                    |
| 1.7         | 11.3178                    | 10.8147                    | 10.5117                    |
| 0.9         | 11.2747                    | 10.6290                    | 10.3839                    |
| 0.4         | 11.2194                    | -*                         | 10.2199                    |

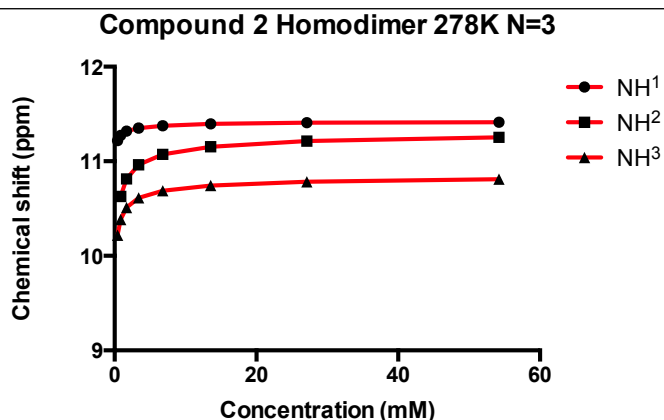

$$K_{\text{DIM}} = 5430 \text{ M}^{-1}$$

$$\text{sigma} = 1.4$$

\*Broadened signal

**Table 48:** <sup>1</sup>H NMR titration of 2 at 288 K

| [2]<br>(mM) | δ NH <sup>1</sup><br>(ppm) | δ NH <sup>2</sup><br>(ppm) | δ NH <sup>3</sup><br>(ppm) |
|-------------|----------------------------|----------------------------|----------------------------|
| 54.2        | 11.3694                    | 11.1407                    | 10.7491                    |
| 27.1        | 11.3597                    | 11.0849                    | 10.7124                    |
| 13.6        | 11.3416                    | 11.0007                    | 10.6555                    |
| 6.8         | 11.3161                    | 10.8882                    | 10.5789                    |
| 3.4         | 11.2812                    | 10.7384                    | 10.4766                    |
| 1.7         | 11.2362                    | 10.547                     | 10.3450                    |
| 0.9         | 11.1813                    | 10.3145                    | 10.1856                    |
| 0.4         | 11.1158                    | -*                         | 9.9954                     |

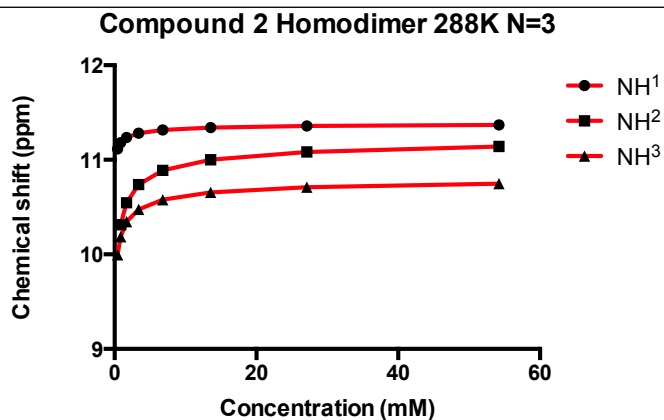

$$K_{\text{DIM}} = 2318 \text{ M}^{-1}$$

$$\text{sigma} = 1.7$$

\*Obscured by another proton signal

**Table 49:**  $^1\text{H}$  NMR titration of 2 at 295 K

| [2]<br>(mM) | $\delta$ NH <sup>1</sup><br>(ppm) | $\delta$ NH <sup>2</sup><br>(ppm) | $\delta$ NH <sup>3</sup><br>(ppm) |
|-------------|-----------------------------------|-----------------------------------|-----------------------------------|
| 54.2        | 11.3366                           | 11.0570                           | 10.7018                           |
| 27.1        | 11.3221                           | 10.9845                           | 10.6536                           |
| 13.6        | 11.2995                           | 10.8797                           | 10.5831                           |
| 6.8         | 11.2671                           | 10.7410                           | 10.4887                           |
| 3.4         | 11.2248                           | 10.5612                           | 10.3660                           |
| 1.7         | 11.1705                           | 10.3311                           | 10.2119                           |
| 0.9*        | 11.1087                           | 10.0339                           | 10.0709                           |
| 0.4         | 11.0376                           | 9.7825                            | 9.8307                            |

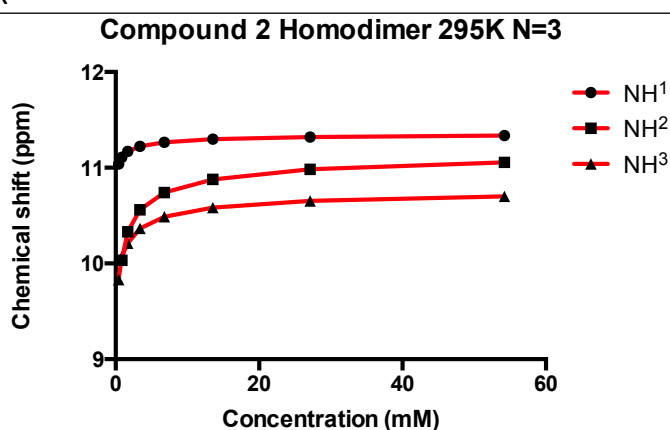 $K_{\text{DIM}} = 1403 \text{ M}^{-1}$ 

sigma= 1.6

NB  $K_{\text{DIM}}$  based on NH<sup>3</sup> only\*Outlier excluded from  $K_{\text{DIM}}$  determination**Table 50:**  $^1\text{H}$  NMR titration of 2 at 298 K

| [2]<br>(mM) | $\delta$ NH <sup>1</sup><br>(ppm) | $\delta$ NH <sup>2</sup><br>(ppm) | $\delta$ NH <sup>3</sup><br>(ppm) |
|-------------|-----------------------------------|-----------------------------------|-----------------------------------|
| 54.2        | 11.3213                           | 11.0169                           | 10.6787                           |
| 27.1        | 11.3055                           | 10.9380                           | 10.6264                           |
| 13.6        | 11.2800                           | 10.8235                           | 10.5490                           |
| 6.8         | 11.2451                           | 10.6740                           | 10.4473                           |
| 3.4         | 11.1992                           | 10.4820                           | 10.3163                           |
| 1.7         | 11.1429                           | 10.2461                           | 10.1550                           |
| 0.9         | 11.0784                           | -*                                | 9.9716                            |
| 0.4         | 11.0070                           | 9.6810                            | 9.7684                            |

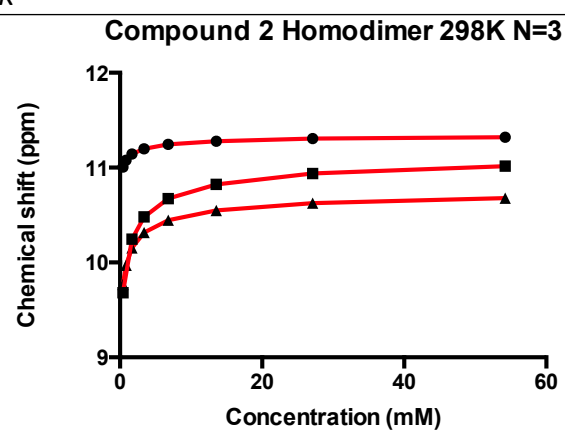 $K_{\text{DIM}} = 1099 \text{ M}^{-1}$ 

sigma= 1.6

\*Obscured by another proton signal



**Table 51:**  $^1\text{H}$  NMR titration of 2 at 308 K

| [2]<br>(mM) | $\delta$ NH <sup>1</sup><br>(ppm) | $\delta$ NH <sup>2</sup><br>(ppm) | $\delta$ NH <sup>3</sup><br>(ppm) |
|-------------|-----------------------------------|-----------------------------------|-----------------------------------|
| 54.2        | 11.2664                           | 10.8735                           | 10.5939                           |
| 27.1        | 11.2437                           | 10.7672                           | 10.5230                           |
| 13.6        | 11.2093                           | 10.6183                           | 10.4223                           |
| 6.8         | 11.1639                           | 10.4294                           | 10.2939                           |
| 3.4         | 11.1078                           | 10.1978                           | 10.1361                           |
| 1.7         | 11.0423                           | 9.9305                            | 9.9530                            |
| 0.9         | 10.9723                           | 9.6451                            | 9.7583                            |
| 0.4         | 10.9025                           | 9.361                             | 9.5647                            |

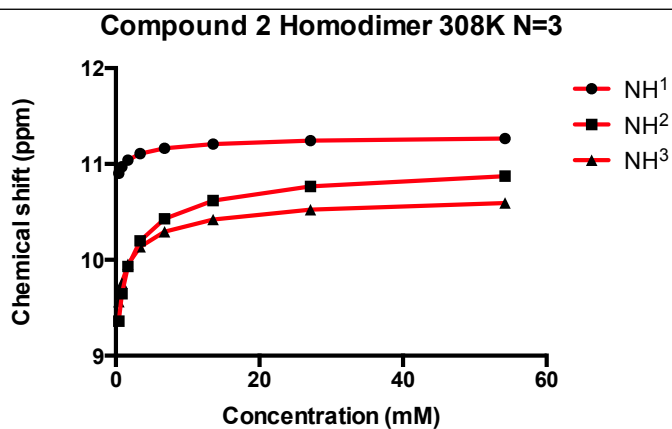 $K_{\text{DIM}} = 570 \text{ M}^{-1}$ 

sigma= 1.7

| Temp (K) | $K_{DIM}$ ( $M^{-1}$ ) | 1/T         | lnK         |
|----------|------------------------|-------------|-------------|
| 308      | 570                    | 0.003246753 | 6.345636361 |
| 298      | 1099                   | 0.003355705 | 7.002155954 |
| 295      | 1403                   | 0.003389831 | 7.24636808  |
| 288      | 2318                   | 0.003472222 | 7.748460024 |
| 278      | 5430                   | 0.003597122 | 8.599694413 |

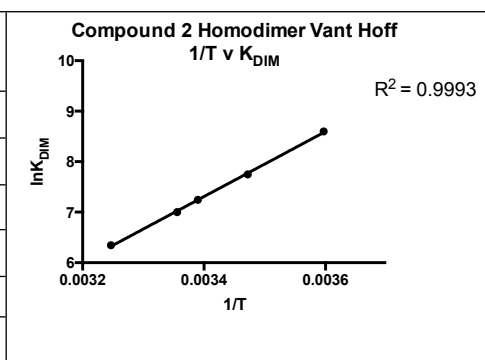

### 2.3.4. Compound 2 Homodimer VT $^1H$ NMR Summary and Van't Hoff Plots

Table 52: Summary of compound 2 Homodimer Experiment 1 and Van't Hoff Plot

| Temp (K) | $K_{DIM}$ ( $M^{-1}$ ) | 1/T         | lnK         |
|----------|------------------------|-------------|-------------|
| 308      | 571                    | 0.003246753 | 6.34738921  |
| 295      | 1360                   | 0.003389831 | 7.215239979 |
| 288      | 2352                   | 0.003472222 | 7.763021309 |
| 278      | 4747                   | 0.003597122 | 8.465268119 |

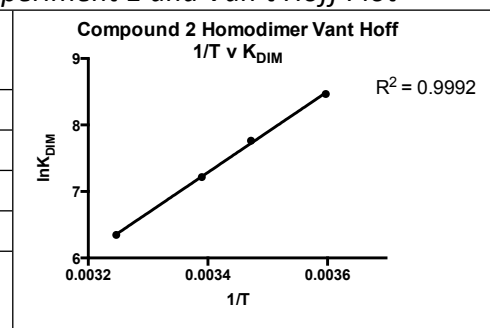

Table 53: Summary of compound 2 Homodimer Experiment 2 and Van't Hoff Plot

| Temp (K) | $K_{DIM}$ ( $M^{-1}$ ) | 1/T         | lnK         |
|----------|------------------------|-------------|-------------|
| 308      | 502                    | 0.003246753 | 6.21860012  |
| 298      | 1009                   | 0.003355705 | 6.91671502  |
| 295      | 1271                   | 0.003389831 | 7.147559271 |
| 288      | 2262                   | 0.003472222 | 7.724004657 |
| 278      | 4928                   | 0.003597122 | 8.502688505 |

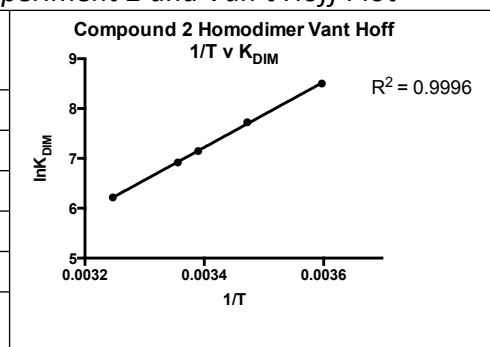

Table 54: Summary of compound 2 Homodimer Experiment 3 and Van't Hoff Plot

Table 55: Summary of thermodynamic parameters for compound 2 homodimer

| Expt           | $\Delta H$ (kcal mol $^{-1}$ ) | $-T\Delta S^{295 K}$ (kcal mol $^{-1}$ ) | $\Delta G$ (kcal mol $^{-1}$ ) |
|----------------|--------------------------------|------------------------------------------|--------------------------------|
| N1             | - 12.1                         | 7.8                                      | - 4.3                          |
| N2             | - 13.0                         | 8.4                                      | - 4.6                          |
| N3             | - 12.8                         | 8.5                                      | - 4.3                          |
| <b>Average</b> | <b>- 12.6</b>                  | <b>8.4</b>                               | <b>- 4.4</b>                   |

## 2.4. 11:1 Heterodimer VT <sup>1</sup>H NMR Titration Experiment

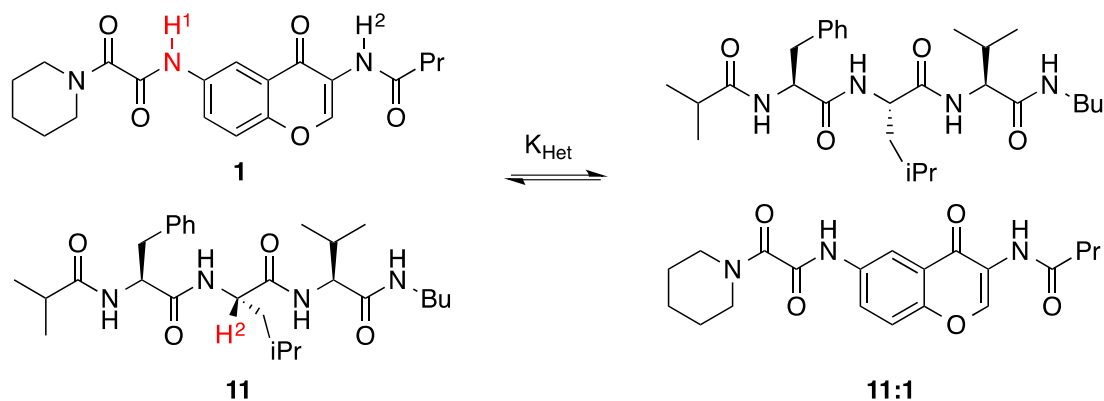

**Figure 5:** Heterodimerisation of 1 and 11. Resonances used to determine binding constants are highlighted in red.

**N.B.**  $K_{\text{Het}}$  was calculated using  $\text{NH}^1$  and  $\text{H}^2$ . The shift of  $\text{NH}^2$  is included for completeness

### 2.4.1 11:1 Heterodimer <sup>1</sup>H NMR Titration Experiment 1

Peptide concentration: 4 mM

**Table 56:** 11:1 Heterodimer <sup>1</sup>H NMR titration at 278 K

| [1]<br>(mM) | $\delta \text{NH}^1$<br>(ppm) | $\delta \text{NH}^2$<br>(ppm) | $\delta \text{H}^2$<br>(ppm) |
|-------------|-------------------------------|-------------------------------|------------------------------|
| 49.1        | 10.5411                       | 9.0581                        | 5.0745                       |
| 36.8        | 10.4644                       | 9.0234                        | 5.0581                       |
| 27.6        | 10.4024                       | 8.9899                        | 5.0347                       |
| 20.7        | 10.3342                       | 8.9575                        | 5.0240                       |
| 15.5        | 10.2651                       | 8.9323                        | 5.0043                       |
| 11.7        | 10.1969                       | 8.9150                        | 4.9798                       |
| 8.7         | 10.1427                       | 8.9013                        | 4.9571                       |
| 4.9*        | 10.0997                       | 8.8941                        | 4.9347                       |
| 3.7         | 10.0422                       | 8.8867                        | 4.8776                       |
| 2.8         | 10.0322                       | 8.8973                        | 4.8540                       |
| 2.1         | 10.0212                       | 8.8943                        | 4.8345                       |
| 1.6         | 10.0233                       | 8.9067                        | 4.8153                       |
| 1.2         | 10.0189                       | 8.9034                        | 4.8037                       |
| 0           | -                             | -                             | 4.7381                       |

●  $\text{NH}^1$   
■  $\text{NH}^2$   
▲  $\text{H}^2$

$K_{\text{Het}} = 904 \text{ M}^{-1}$   
\*Outlier not included in  $K_{\text{Het}}$  determination

$\text{sigma} = 8.4$

**Table 57:** 11:1 Heterodimer  $^1H$  NMR titration at 288 K

| [1]<br>(mM) | $\delta$ NH <sup>1</sup><br>(ppm) | $\delta$ NH <sup>2</sup><br>(ppm) | $\delta$ H <sup>2</sup><br>(ppm) |
|-------------|-----------------------------------|-----------------------------------|----------------------------------|
| 49.1        | 10.4097                           | 8.9277                            | 5.0460                           |
| 36.8        | 10.3329                           | 8.8893                            | 5.0293                           |
| 27.6        | 10.2707                           | 8.8522                            | 5.0064                           |
| 20.7        | 10.2046                           | 8.8172                            | 4.9835                           |
| 15.5        | 10.1397                           | 8.7878                            | 4.9581                           |
| 11.7        | 10.0794                           | 8.7668                            | 4.9278                           |
| 8.7         | 10.0328                           | 8.7500                            | 4.8987                           |
| 6.6*        | 9.9692                            | 8.7356                            | 4.8405                           |
| 3.7*        | 9.9457                            | 8.7226                            | 4.8100                           |
| 2.8         | 9.9376                            | 8.7288                            | 4.7889                           |
| 2.1         | 9.9256                            | 8.7218                            | 4.7656                           |
| 1.6         | 9.9272                            | 8.7116                            | 4.7498                           |
| 1.2         | 9.9209                            | 8.7257                            | 4.7341                           |
| 0           | -                                 | -                                 | 4.6723                           |

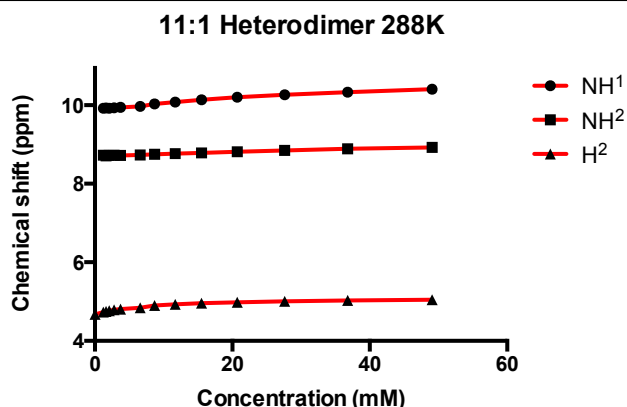

$K_{Het} = 512 \text{ M}^{-1}$   $\sigma = 7.0$   
 \*Outlier not included in  $K_{Het}$  determination

**Table 58:** 11:1 Heterodimer  $^1H$  NMR titration at 295 K

| [1]<br>(mM) | $\delta$ NH <sup>1</sup><br>(ppm) | $\delta$ NH <sup>2</sup><br>(ppm) | $\delta$ H <sup>2</sup><br>(ppm) |
|-------------|-----------------------------------|-----------------------------------|----------------------------------|
| 49.1*       | 10.3148                           | 8.8347                            | 5.0179                           |
| 36.8        | 10.2394                           | 8.7947                            | 4.9958                           |
| 27.6        | 10.1793                           | 8.7575                            | 4.9719                           |
| 20.7        | 10.1147                           | 8.7202                            | 4.9438                           |
| 15.5        | 10.0539                           | 8.6896                            | 4.9150                           |
| 11.7        | 9.9993                            | 8.6671                            | 4.8819                           |
| 8.7         | 9.9570                            | 8.6484                            | 4.8504                           |
| 4.9*        | 9.9229                            | 8.6336                            | 4.8185                           |
| 3.7         | 9.8764                            | 8.6130                            | 4.7582                           |
| 2.8         | 9.8679                            | 8.6159                            | 4.7364                           |
| 2.1         | 9.8551                            | 8.6067                            | 4.7137                           |
| 1.6         | 9.8560                            | 8.6144                            | 4.6989                           |
| 1.2         | 9.8491                            | 8.6080                            | 4.6798                           |
| 0           | -                                 | -                                 | 4.6241                           |

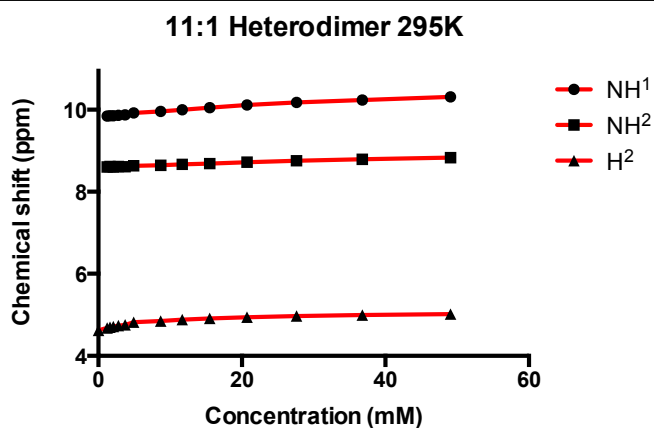

$K_{Het} = 332 \text{ M}^{-1}$   $\sigma = 7.3$   
 \*Outlier not included in  $K_{Het}$  determination

**Table 59: 11:1 Heterodimer <sup>1</sup>H NMR titration at 298 K**

| [1]<br>(mM) | δ NH <sup>1</sup><br>(ppm) | δ NH <sup>2</sup><br>(ppm) | δ H <sup>2</sup><br>(ppm) |
|-------------|----------------------------|----------------------------|---------------------------|
| 49.1        | 10.2791                    | 8.7998                     | 5.0061                    |
| 36.8        | 10.2022                    | 8.7570                     | 4.9811                    |
| 27.6        | 10.1457                    | 8.7221                     | 4.9570                    |
| 20.7        | 10.0778                    | 8.6804                     | 4.9251                    |
| 15.5        | 10.0187                    | 8.6494                     | 4.8945                    |
| 11.7        | 9.9661                     | 8.6260                     | 4.8597                    |
| 8.7         | 9.9248                     | 8.6059                     | 4.8268                    |
| 6.6*        | 9.8677                     | 8.5821                     | 4.7634                    |
| 3.7         | 9.8460                     | 8.5673                     | 4.7337                    |
| 2.8         | 9.8371                     | 8.5684                     | 4.7123                    |
| 2.1         | 9.8237                     | 8.5581                     | 4.6893                    |
| 1.6         | 9.8240                     | 8.5644                     | 4.6747                    |
| 1.2         | 9.8168                     | 8.5580                     | 4.6598                    |
| 0           | -                          | -                          | 4.6007                    |

**K<sub>Het</sub> = 272 M<sup>-1</sup>**      **sigma = 6.8**

\*Outlier excluded from K<sub>Het</sub> determination

**Table 60: 11:1 Heterodimer <sup>1</sup>H NMR titration at 308 K**

| [1]<br>(mM) | δ NH <sup>1</sup><br>(ppm) | δ NH <sup>2</sup><br>(ppm) | δ H <sup>2</sup><br>(ppm) |
|-------------|----------------------------|----------------------------|---------------------------|
| 49.1        | 10.1454                    | 8.6701                     | 4.9459                    |
| 36.8        | 10.0737                    | 8.6282                     | 4.9218                    |
| 27.6        | 10.0200                    | 8.5926                     | 4.8901                    |
| 20.7        | 9.9568                     | 8.5507                     | 4.8492                    |
| 15.5        | 9.9027                     | 8.5182                     | 4.8137                    |
| 11.7        | 9.8555                     | 8.4922                     | 4.7753                    |
| 8.7         | 9.8191                     | 8.4706                     | 4.7407                    |
| 6.6**       | 9.7659                     | 8.4395                     | 4.6756                    |
| 3.7         | 9.7440                     | 8.4217                     | 4.6379                    |
| 2.8         | 9.7346                     | 8.4129                     | 4.6262                    |
| 2.1         | 9.7203                     | -*                         | 4.6048                    |
| 1.6         | 9.7192                     | 8.4104                     | 4.5954                    |
| 1.2         | 9.7126                     | -*                         | 4.5801                    |
| 0           | -                          | -                          | 4.5264                    |

**K<sub>Het</sub> = 141 M<sup>-1</sup>**      **sigma = 5.6**

\*Obscured by another signal

\*\*Outlier excluded from K<sub>Het</sub> determination

## 2.4.2. 11:1 Heterodimer <sup>1</sup>H NMR Titration Experiment 2

Peptide concentration: 4.3 mM

**Table 61:** 11:1 Heterodimer <sup>1</sup>H NMR titration at 278 K

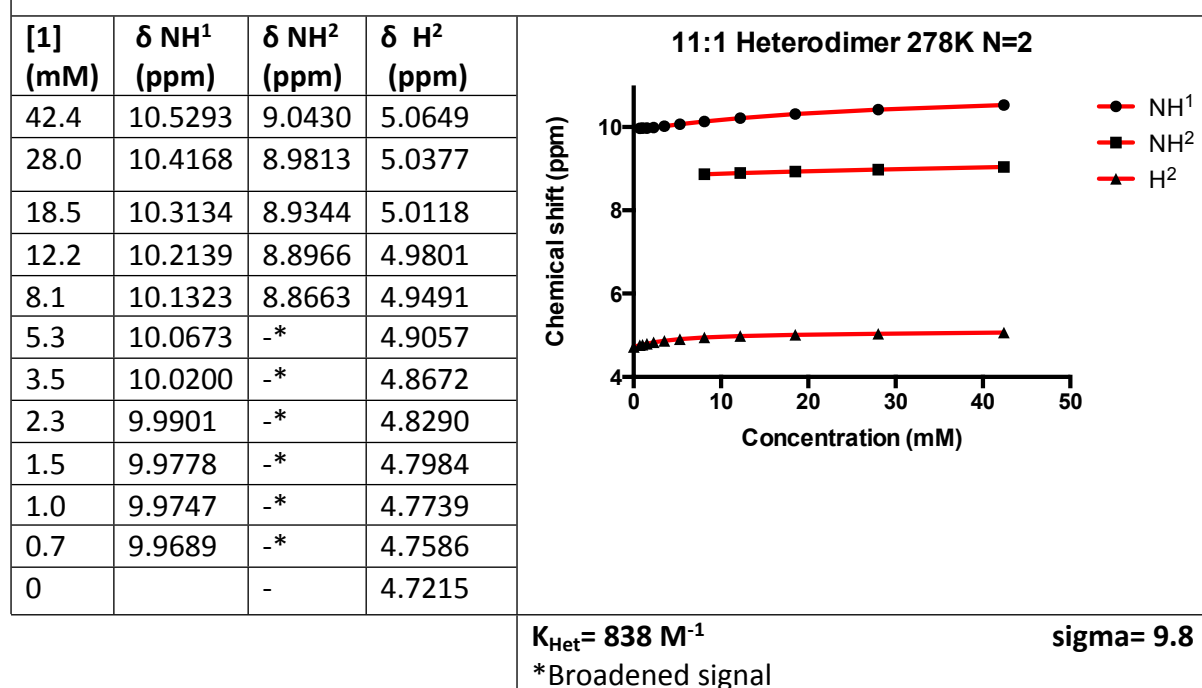

**Table 62:** 11:1 Heterodimer <sup>1</sup>H NMR titration at 288 K

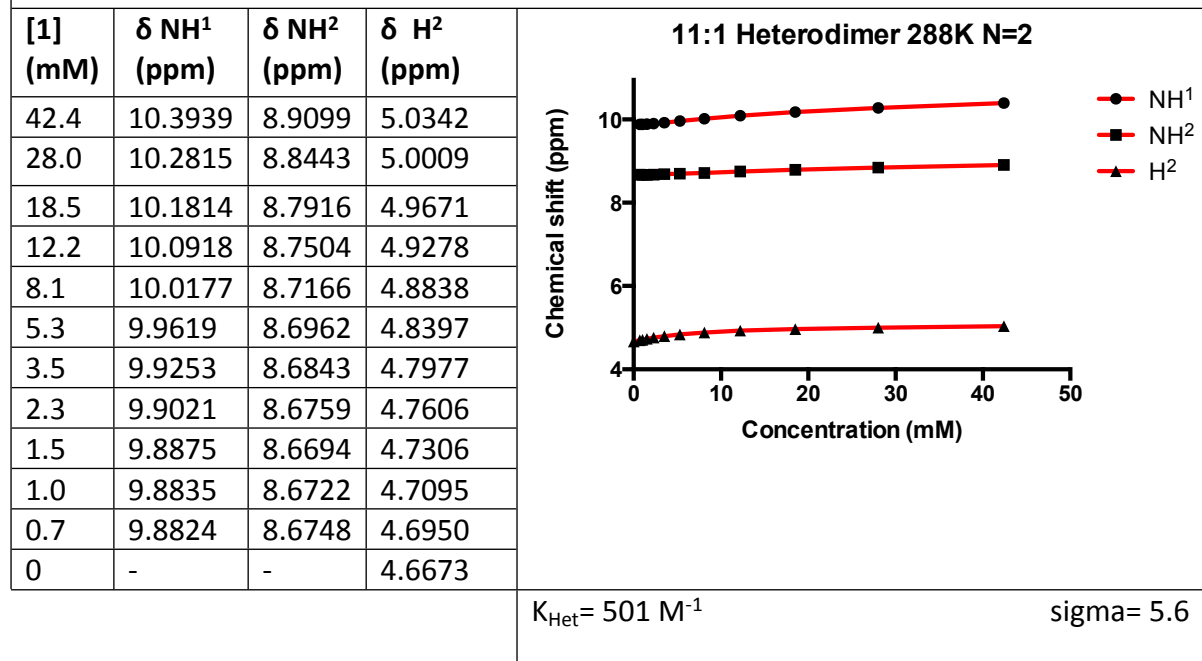

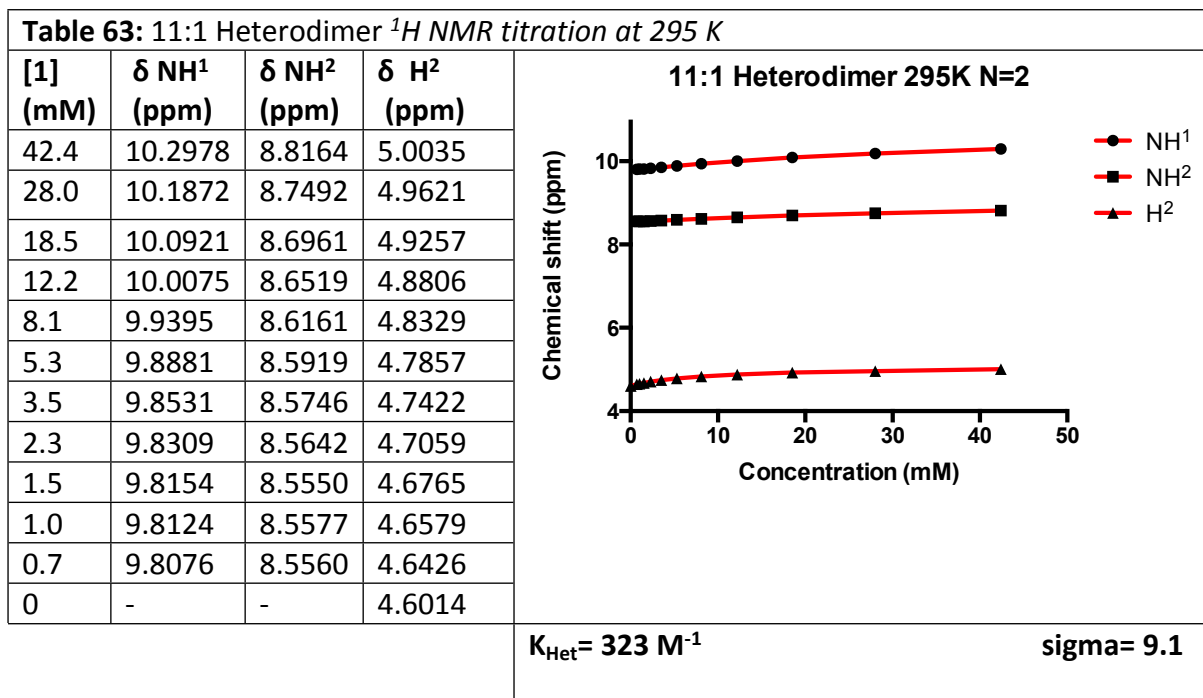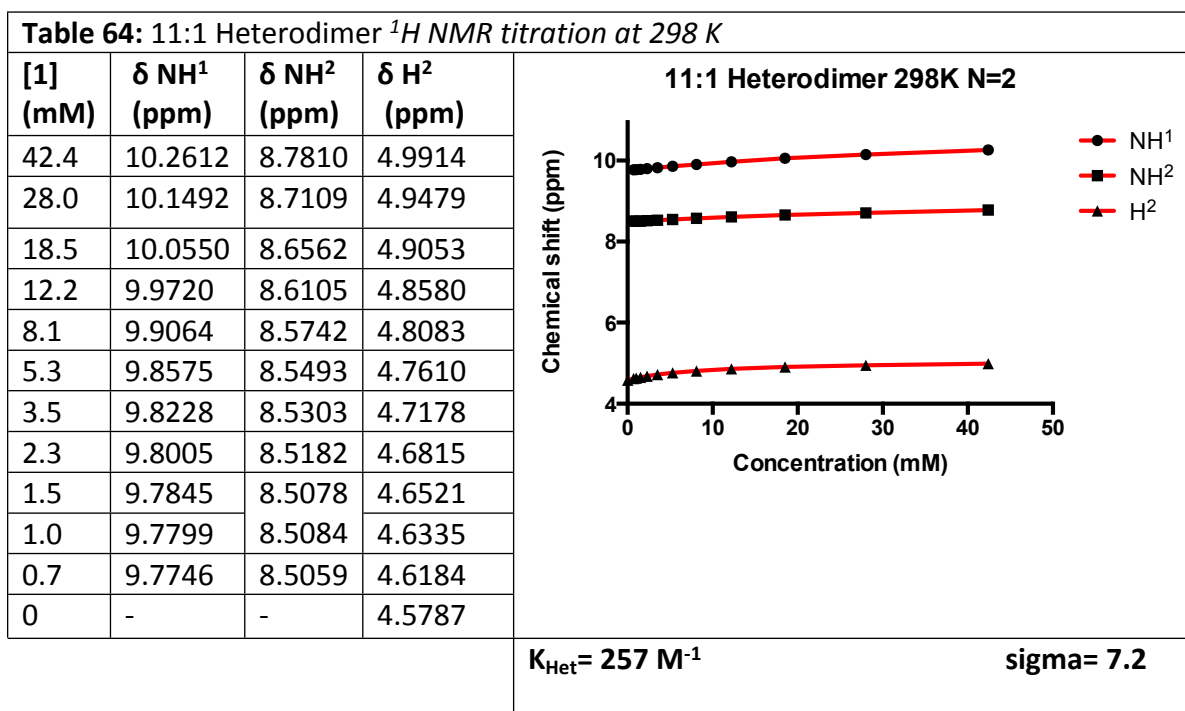

| <b>Table 65: 11:1 Heterodimer <sup>1</sup>H NMR titration at 308 K</b> |                                   |                                   |                                  |
|------------------------------------------------------------------------|-----------------------------------|-----------------------------------|----------------------------------|
| <b>[1]<br/>(mM)</b>                                                    | <b>δ NH<sup>1</sup><br/>(ppm)</b> | <b>δ NH<sup>2</sup><br/>(ppm)</b> | <b>δ H<sup>2</sup><br/>(ppm)</b> |
| 42.4                                                                   | 10.1283                           | 8.6530                            | 4.9288                           |
| 28.0                                                                   | 10.0210                           | 8.5826                            | 4.8752                           |
| 18.5                                                                   | 9.9328                            | 8.5264                            | 4.8262                           |
| 12.2                                                                   | 9.8598                            | 8.4815                            | 4.7908                           |
| 8.1                                                                    | 9.7996                            | 8.4420                            | 4.7197                           |
| 5.3                                                                    | 9.7541                            | -*                                | 4.6703                           |
| 3.5                                                                    | 9.7205                            | 8.3894                            | 4.6272                           |
| 2.3                                                                    | 9.6988                            | 8.3742                            | 4.5944                           |
| 1.5                                                                    | 9.6818                            | 8.3611                            | 4.5708                           |
| 1.0                                                                    | 9.6755                            | 8.3584                            | 4.5517                           |
| 0.7                                                                    | 9.6695                            | 8.3542                            | 4.5392                           |
| 0                                                                      | -                                 | -                                 | 4.5129                           |

  

**K<sub>Het</sub> = 157 M<sup>-1</sup>**      **sigma = 6.7**

\*Obscured by another proton signal



### 2.4.3. 11:1 Heterodimer <sup>1</sup>H NMR Titration Experiment 3

Peptide concentration: 3.3 mM

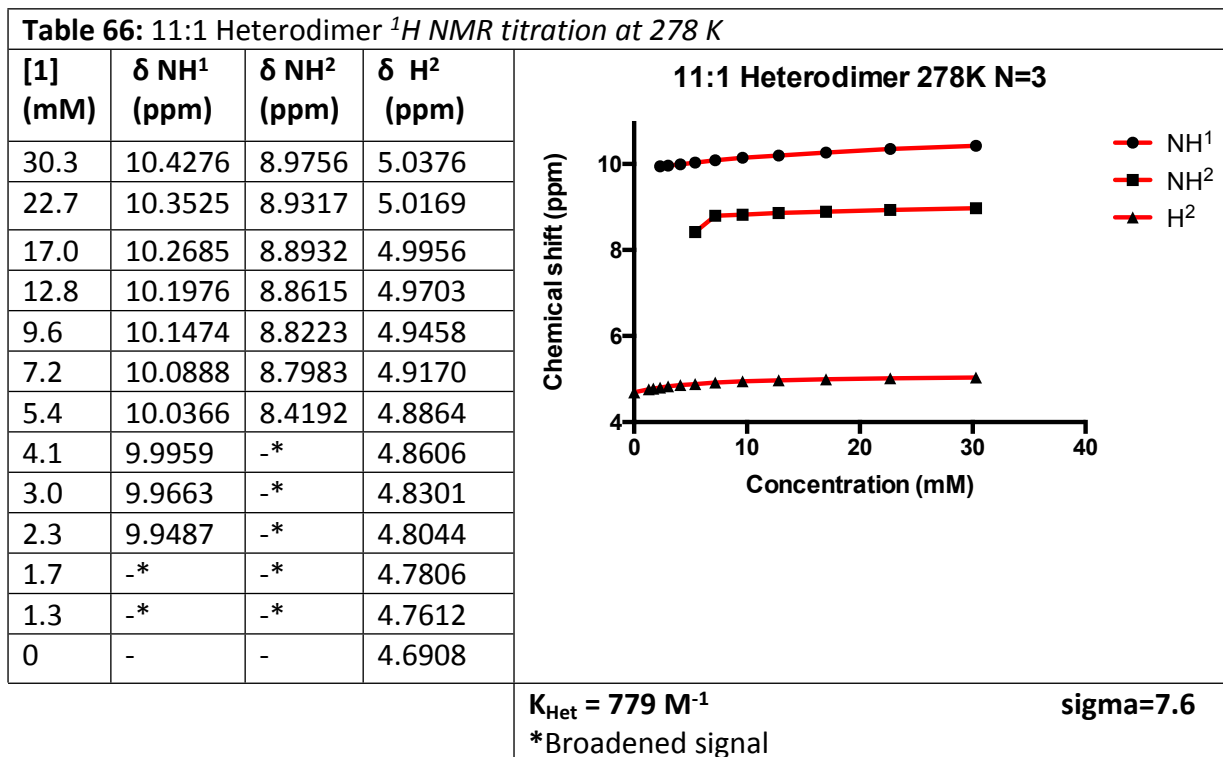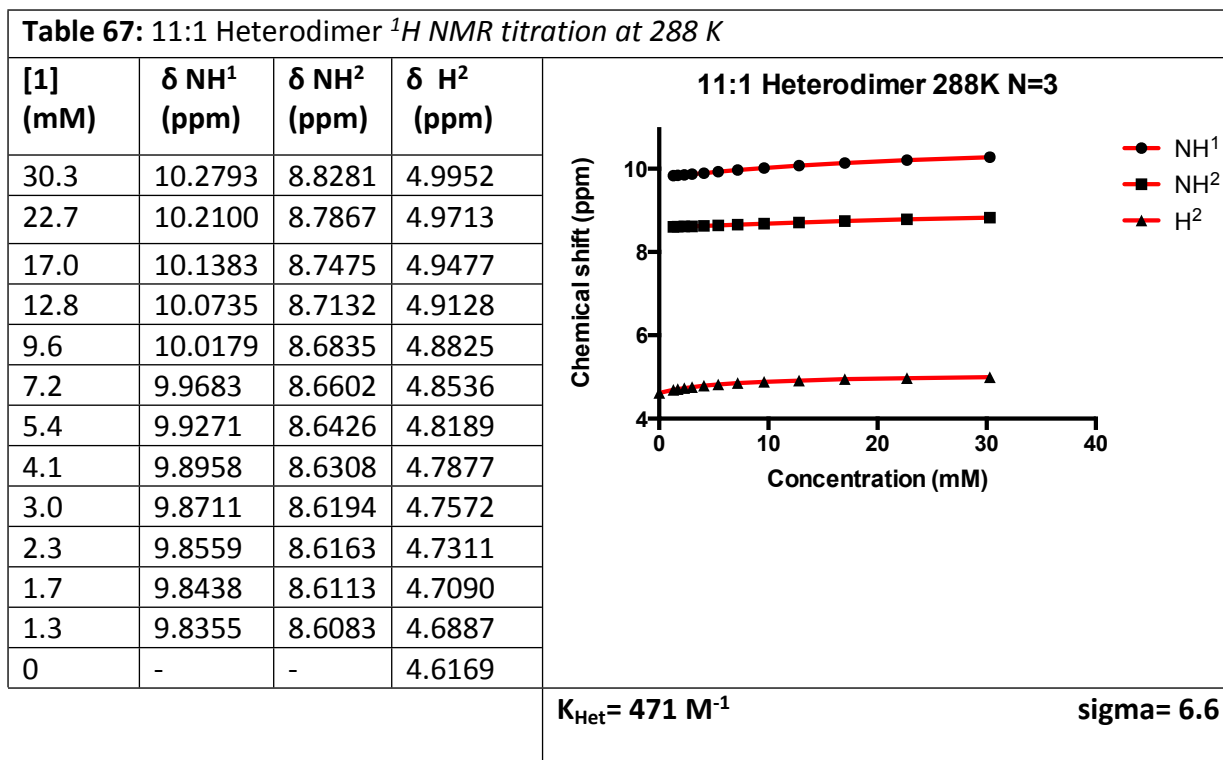

**Table 68:** 11:1 Heterodimer  $^1\text{H}$  NMR titration at 295 K

| [1]<br>(mM) | $\delta$ NH <sup>1</sup><br>(ppm) | $\delta$ NH <sup>2</sup><br>(ppm) | $\delta$ H <sup>2</sup><br>(ppm) |
|-------------|-----------------------------------|-----------------------------------|----------------------------------|
| 30.3        | 10.1863                           | 8.7372                            | 4.9564                           |
| 22.7        | 10.1175                           | 8.6925                            | 4.9295                           |
| 17.0        | 10.0482                           | 8.6517                            | 4.8980                           |
| 12.8        | 9.9866                            | 8.6157                            | 4.8625                           |
| 9.6         | 9.9382                            | 8.5887                            | 4.8329                           |
| 7.2         | 9.8890                            | 8.5596                            | 4.7937                           |
| 5.4         | 9.8513                            | 8.5400                            | 4.7593                           |
| 4.1         | 9.8221                            | 8.5249                            | 4.7264                           |
| 3.0         | 9.7980                            | 8.5104                            | 4.6957                           |
| 2.3         | 9.7830                            | 8.5042                            | 4.6715                           |
| 1.7         | 9.7700                            | 8.4962                            | 4.6494                           |
| 1.3         | 9.7604                            | 8.4903                            | 4.6299                           |
| 0           | -                                 | -                                 | 4.5626                           |

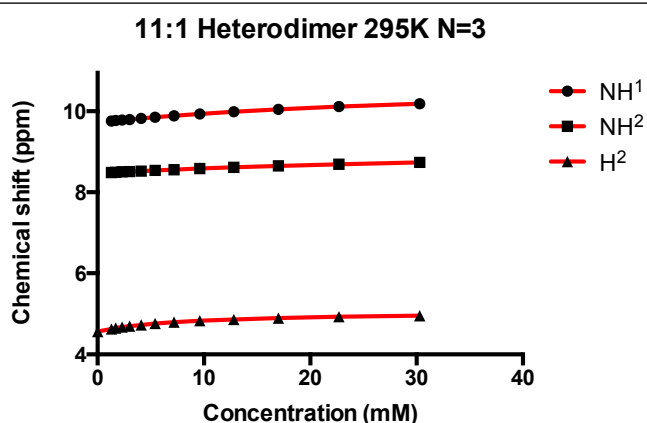 $K_{\text{Het}} = 294 \text{ M}^{-1}$ 

sigma= 6.1

**Table 69:** 11:1 Heterodimer  $^1\text{H}$  NMR titration at 298 K

| [1]<br>(mM) | $\delta$ NH <sup>1</sup><br>(ppm) | $\delta$ NH <sup>2</sup><br>(ppm) | $\delta$ H <sup>2</sup><br>(ppm) |
|-------------|-----------------------------------|-----------------------------------|----------------------------------|
| 30.3        | 10.1447                           | 8.6952                            | 4.9440                           |
| 22.7        | 10.0767                           | 8.6513                            | 4.9078                           |
| 17.0        | 10.0093                           | 8.6105                            | 4.8710                           |
| 12.8        | 9.9508                            | 8.5755                            | 4.8387                           |
| 9.6         | 9.9045                            | 8.5489                            | 4.8086                           |
| 7.2         | 9.8557                            | 8.5180                            | 4.7661                           |
| 5.4         | 9.8190                            | 8.4973                            | 4.7317                           |
| 4.1         | 9.7906                            | 8.4811                            | 4.6993                           |
| 3.0         | 9.7678                            | 8.4670                            | 4.6700                           |
| 2.3         | 9.7529                            | 8.4600                            | 4.6453                           |
| 1.7         | 9.7407                            | 8.4521                            | 4.6248                           |
| 1.3         | 9.7306                            | 8.4458                            | 4.6061                           |
| 0           | -                                 | -                                 | 4.5418                           |

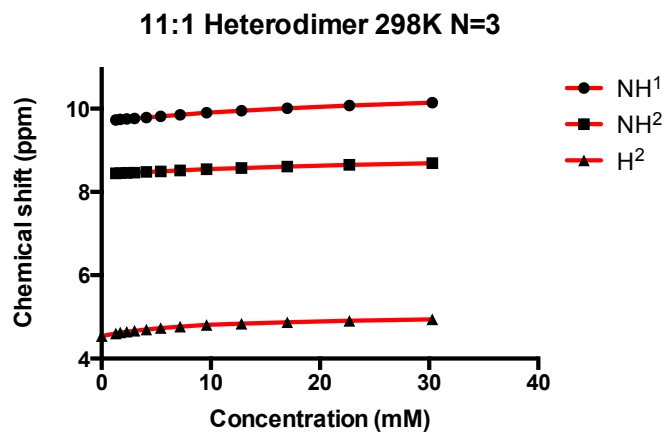 $K_{\text{Het}} = 225 \text{ M}^{-1}$ 

sigma= 5.5

**Table 70:** 11:1 Heterodimer <sup>1</sup>H NMR titration at 308 K

| [1]<br>(mM) | δ NH <sup>1</sup><br>(ppm) | δ NH <sup>2</sup><br>(ppm) | δ H <sup>2</sup><br>(ppm) |
|-------------|----------------------------|----------------------------|---------------------------|
| 30.3        | 10.0174                    | 8.5704                     | 4.8861                    |
| 22.7        | 9.9517                     | 8.5250                     | 4.8282                    |
| 17.0        | 9.8903                     | 8.4847                     | 4.7893                    |
| 12.8        | 9.8353                     | 8.4477                     | 4.7478                    |
| 9.6         | 9.7974                     | -*                         | 4.7182                    |
| 7.2         | 9.7508                     | 8.3899                     | 4.6729                    |
| 5.4         | 9.7180                     | 8.3687                     | 4.6380                    |
| 4.1         | 9.6915                     | 8.3493                     | 4.6069                    |
| 3.0         | 9.6690                     | 8.3323                     | 4.5786                    |
| 2.3         | 9.6551                     | 8.3237                     | 4.5580                    |
| 1.7         | 9.6410                     | 8.3123                     | 4.5383                    |
| 1.3         | 9.6303                     | 8.3039                     | 4.5222                    |
| 0           | -                          | -                          | 4.4657                    |

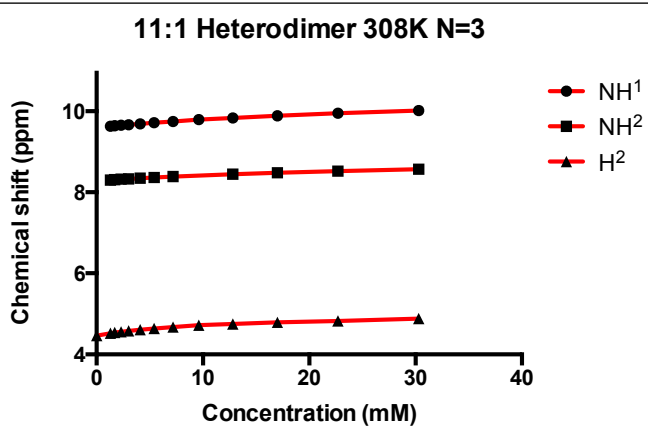

$K_{\text{Het}} = 115 \text{ M}^{-1}$

$\sigma = 5.6$

\*Obscured by another proton signal

## 2.4.4. 11:1 Heterodimer VT <sup>1</sup>H NMR Summary and Van't Hoff Plots

**Table 71:** Summary of 11:1 Heterodimer Experiment 1 and Van't Hoff Plot

| Temp (K) | K <sub>Het</sub> (M <sup>-1</sup> ) | 1/T         | lnK <sub>Het</sub> |
|----------|-------------------------------------|-------------|--------------------|
| 308      | 142                                 | 0.003246753 | 4.955827058        |
| 298      | 272                                 | 0.003355705 | 5.605802066        |
| 295      | 332                                 | 0.003389831 | 5.805134969        |
| 288      | 512                                 | 0.003472222 | 6.238324625        |
| 278      | 904                                 | 0.003597122 | 6.80682936         |



**Table 72:** Summary of 11:1 Heterodimer Experiment 2 and Van't Hoff Plot

| Temp (K) | K <sub>Het</sub> (M <sup>-1</sup> ) | 1/T         | lnK <sub>Het</sub> |
|----------|-------------------------------------|-------------|--------------------|
| 308      | 157                                 | 0.003246753 | 5.056245805        |
| 298      | 257                                 | 0.003355705 | 5.549076085        |
| 295      | 323                                 | 0.003389831 | 5.777652323        |
| 288      | 501                                 | 0.003472222 | 6.216606101        |
| 278      | 838                                 | 0.003597122 | 6.7310181          |

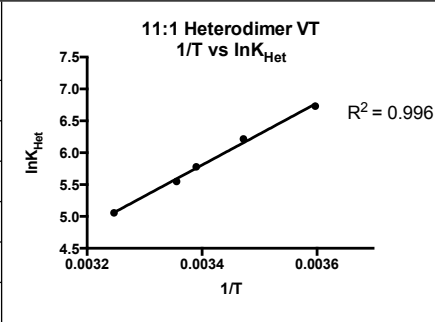

**Table 73:** Summary of 11:1 Heterodimer Experiment 3 and Van't Hoff Plot

| Temp (K) | K <sub>Het</sub> (M <sup>-1</sup> ) | 1/T         | lnK <sub>Het</sub> |
|----------|-------------------------------------|-------------|--------------------|
| 308      | 115                                 | 0.003246753 | 4.744932128        |
| 298      | 225                                 | 0.003355705 | 5.416100402        |
| 295      | 294                                 | 0.003389831 | 5.683579767        |
| 288      | 471                                 | 0.003472222 | 6.154858094        |
| 278      | 779                                 | 0.003597122 | 6.658011046        |

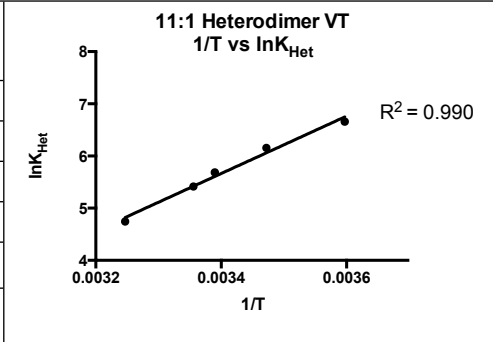

**Table 74:** Summary of thermodynamic parameters for 11:1 heterodimer

| Expt           | ΔH (kcal mol <sup>-1</sup> ) | -TΔS <sup>295 K</sup> (kcal mol <sup>-1</sup> ) | ΔG (kcal mol <sup>-1</sup> ) |
|----------------|------------------------------|-------------------------------------------------|------------------------------|
| N1             | - 10.9                       | 7.6                                             | - 3.3                        |
| N2             | - 9.7                        | 6.3                                             | - 3.1                        |
| N3             | - 10.5                       | 7.1                                             | - 3.4                        |
| <b>Average</b> | <b>- 10.4</b>                | <b>7.0</b>                                      | <b>- 3.3</b>                 |

## 2.5. 11:2 Heterodimer VT <sup>1</sup>H NMR Titration Experiment

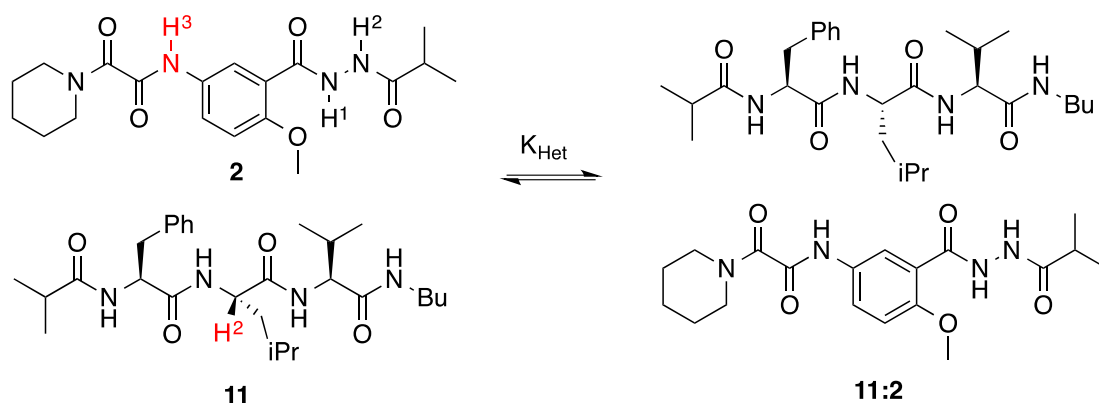

**Figure 6:** Heterodimerisation of 2 and 11. Resonances used to determine binding constants are highlighted in red.

**N.B.**  $K_{\text{Het}}$  was calculated on using  $\text{NH}^3$  and  $\text{H}^2$ . Shifts  $\text{NH}^1$  and  $\text{NH}^2$  are included for completeness

### 2.5.1. 11:2 Heterodimer <sup>1</sup>H NMR Titration Experiment 1

Peptide concentration: 3.1 mM

| [2]<br>(mM) | $\delta \text{NH}^1$<br>(ppm) | $\delta \text{NH}^2$<br>(ppm) | $\delta \text{NH}^3$<br>(ppm) | $\delta \text{H}^2$<br>(ppm) |
|-------------|-------------------------------|-------------------------------|-------------------------------|------------------------------|
| 34.0        | 11.3932                       | 11.2824                       | 10.7386                       | 5.0457                       |
| 25.5        | 11.3870                       | 11.2795                       | 10.7124                       | 5.0387                       |
| 19.1        | 11.3783                       | 11.2777                       | 10.6782                       | 5.0298                       |
| 14.3        | 11.3705                       | -*                            | 10.6443                       | 5.0200                       |
| 10.8        | 11.3605                       | -*                            | 10.6006                       | 5.0075                       |
| 8.1         | 11.3493                       | -*                            | 10.5508                       | 4.9874                       |
| 6.1         | 11.3372                       | -*                            | 10.4955                       | 4.9725                       |
| 4.5         | 11.3259                       | -*                            | 10.4395                       | 4.9524                       |
| 3.4         | 11.3153                       | -*                            | 10.3878                       | 4.9266                       |
| 2.6         | 11.3076                       | -*                            | 10.3444                       | 4.8988                       |
| 1.9         | 11.3011                       | -*                            | 10.3155                       | 4.8644                       |
| 1.4         | 11.2955                       | -*                            | 10.2884                       | 4.8307                       |
| 0           | -                             | -                             | -                             | 4.4425                       |

11:2 Heterodimer 278K

● NH<sup>1</sup>  
 ■ NH<sup>2</sup>  
 ▲ NH<sup>3</sup>  
 ▼ H<sup>2</sup>

$K_{\text{DIM}} = 13,433 \text{ M}^{-1}$   
 \*Broadened signal

sigma = 6.8

**Table 76:** 11:2 Heterodimer <sup>1</sup>H NMR titration at 288 K

| [2]<br>(mM) | δ NH <sup>1</sup><br>(ppm) | δ NH <sup>2</sup><br>(ppm) | δ NH <sup>3</sup><br>(ppm) | δ H <sup>2</sup><br>(ppm) |
|-------------|----------------------------|----------------------------|----------------------------|---------------------------|
| 34.0        | 11.3480                    | 11.1624                    | 10.6768                    | 5.0344                    |
| 25.5        | 11.3398                    | 11.1521                    | 10.6471                    | 5.0238                    |
| 19.1        | 11.3308                    | 11.1468                    | 10.6117                    | 5.0126                    |
| 14.3        | 11.3212                    | 11.1388                    | 10.5754                    | 4.9985                    |
| 10.8        | 11.3096                    | 11.1359                    | 10.5307                    | 4.9817                    |
| 8.1         | 11.2987                    | 11.1382                    | 10.4837                    | 4.9678                    |
| 6.1         | 11.2865                    | 11.1486                    | 10.4321                    | 4.9397                    |
| 4.5         | 11.2756                    | 11.1699                    | 10.3816                    | 4.9144                    |
| 3.4         | 11.2659                    | -*                         | 10.3371                    | 4.8851                    |
| 2.6         | 11.2501                    | -*                         | 10.2983                    | 4.8479                    |
| 1.9         | 11.2441                    | -*                         | 10.2690                    | 4.8130                    |
| 1.4         | 11.2534                    | -*                         | 10.2485                    | 4.7780                    |
| 0           | -                          | -*                         | -                          | 4.6061                    |

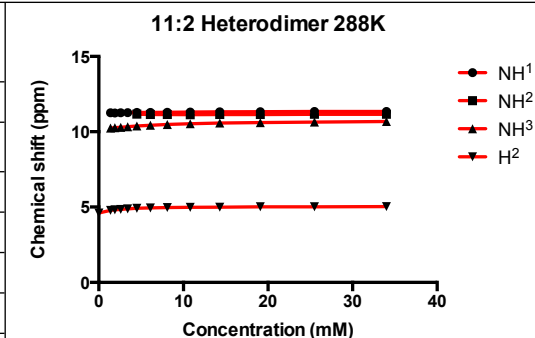 $K_{DIM} = 5530 \text{ M}^{-1}$ 

sigma=6.8

\*Broadened signal

**Table 77:** 11:2 Heterodimer <sup>1</sup>H NMR titration at 295 K

| [2]<br>(mM) | δ NH <sup>1</sup><br>(ppm) | δ NH <sup>2</sup><br>(ppm) | δ NH <sup>3</sup><br>(ppm) | δ H <sup>2</sup><br>(ppm) |
|-------------|----------------------------|----------------------------|----------------------------|---------------------------|
| 34.0        | 11.3163                    | 11.0776                    | 10.6315                    | 5.0225                    |
| 25.5        | 11.3051                    | 11.0557                    | 10.5961                    | 5.0086                    |
| 19.1        | 11.2947                    | 11.0388                    | 10.5580                    | 4.9935                    |
| 14.3        | 11.2837                    | 11.0262                    | 10.5195                    | 4.9771                    |
| 10.8        | 11.2718                    | 11.0153                    | 10.4756                    | 4.9573                    |
| 8.1         | 11.2590                    | 11.0073                    | 10.4265                    | 4.9370                    |
| 6.1         | 11.2462                    | 11.0068                    | 10.3763                    | 4.9078                    |
| 4.5         | 11.2342                    | 11.0128                    | 10.3280                    | 4.8803                    |
| 3.4         | 11.2247                    | 11.0240                    | 10.2865                    | 4.8431                    |
| 2.6         | 11.2156                    | 11.0342                    | 10.2494                    | 4.8056                    |
| 1.9         | 11.2088                    | 11.0460                    | 10.2207                    | 4.7686                    |
| 1.4         | 11.2042                    | -*                         | 10.1996                    | 4.7322                    |
| 0           | -                          | -                          | -                          | 4.5531                    |

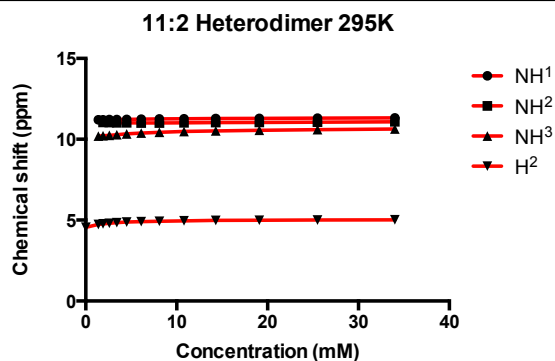 $K_{DIM} = 3182 \text{ M}^{-1}$ 

sigma= 10.3

\*Broadened signal

**Table 78:** 11:2 Heterodimer  $^1\text{H}$  NMR titration at 298 K

| [2]<br>(mM) | $\delta$ NH <sup>1</sup><br>(ppm) | $\delta$ NH <sup>2</sup><br>(ppm) | $\delta$ NH <sup>3</sup><br>(ppm) | $\delta$ H <sup>2</sup><br>(ppm) |
|-------------|-----------------------------------|-----------------------------------|-----------------------------------|----------------------------------|
| 34.0        | 11.2993                           | 11.0313                           | 10.6061                           | 5.0148                           |
| 25.5        | 11.2904                           | 11.0131                           | 10.5737                           | 5.0016                           |
| 19.1        | 11.2790                           | 10.9953                           | 10.5344                           | 4.9847                           |
| 14.3        | 11.2673                           | 10.9739                           | 10.4931                           | 4.9669                           |
| 10.8        | 11.2542                           | 10.9606                           | 10.4477                           | 4.9439                           |
| 8.1         | 11.2407                           | 10.9464                           | 10.3991                           | 4.9226                           |
| 6.1         | 11.2277                           | 10.9428                           | 10.3497                           | 4.8890                           |
| 4.5         | 11.2154                           | 10.9434                           | 10.3018                           | 4.8584                           |
| 3.4         | 11.2063                           | 10.9536                           | 10.2626                           | 4.8255                           |
| 2.6         | 11.1963                           | 10.9530                           | 10.2245                           | 4.7867                           |
| 1.9         | 11.1892                           | 10.9606                           | 10.1959                           | 4.7494                           |
| 1.4         | 11.1847                           | 10.9802                           | 10.1751                           | 4.7178                           |
| 0           | -                                 | -                                 | -                                 | 4.5326                           |

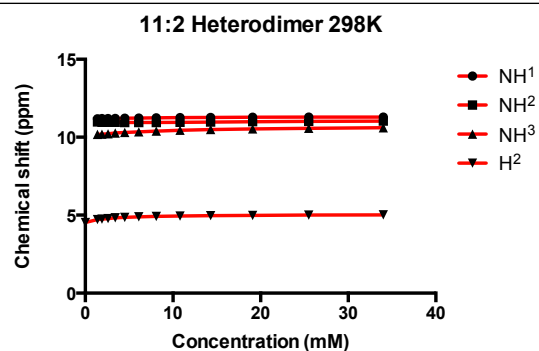 $K_{\text{DIM}} = 2095 \text{ M}^{-1}$ 

sigma = 13.3

**Table 79:** 11:2 Heterodimer  $^1\text{H}$  NMR titration at 308 K

| [2]<br>(mM) | $\delta$ NH <sup>1</sup><br>(ppm) | $\delta$ NH <sup>2</sup><br>(ppm) | $\delta$ NH <sup>3</sup><br>(ppm) | $\delta$ H <sup>2</sup><br>(ppm) |
|-------------|-----------------------------------|-----------------------------------|-----------------------------------|----------------------------------|
| 34.0        | 11.2425                           | 10.8723                           | 10.5181                           | 4.9845                           |
| 25.5        | 11.2305                           | 10.8416                           | 10.4798                           | 4.9652                           |
| 19.1        | 11.2171                           | 10.8094                           | 10.4356                           | 4.9431                           |
| 14.3        | 11.2046                           | 10.7834                           | 10.3942                           | 4.9197                           |
| 10.8        | 11.1894                           | 10.7509                           | 10.3449                           | 4.8910                           |
| 8.1         | 11.1754                           | 10.7235                           | 10.2959                           | 4.8594                           |
| 6.1         | 11.1606                           | 10.7014                           | 10.2458                           | 4.8246                           |
| 4.5         | 11.1470                           | 10.6834                           | 10.1990                           | 4.7854                           |
| 3.4         | 11.1368                           | 10.6752                           | 10.1608                           | 4.7522                           |
| 2.6         | 11.1243                           | 10.6502                           | 10.1200                           | 4.7080                           |
| 1.9         | 11.1154                           | 10.6386                           | 10.0893                           | 4.6705                           |
| 1.4         | 11.1087                           | 10.6361                           | 10.0648                           | 4.6362                           |
| 0           | -                                 | -                                 | -                                 | 4.4581                           |

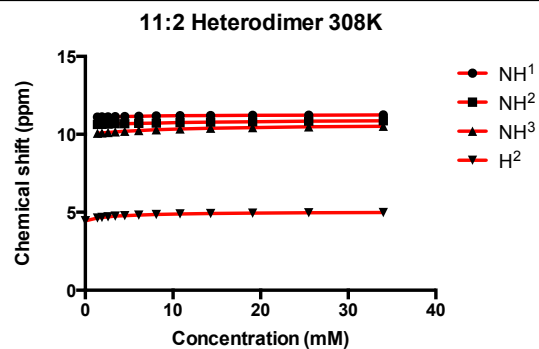 $K_{\text{DIM}} = 1178 \text{ M}^{-1}$ 

sigma = 6.9

## 2.5.2. 11:2 Heterodimer <sup>1</sup>H NMR Titration Experiment 2

Peptide concentration: 3.1 mM

**Table 80:** 11:2 Heterodimer <sup>1</sup>H NMR titration at 278 K

| [2]<br>(mM) | δ NH <sup>1</sup><br>(ppm) | δ NH <sup>2</sup><br>(ppm) | δ NH <sup>3</sup><br>(ppm) | δ H <sup>2</sup><br>(ppm) |
|-------------|----------------------------|----------------------------|----------------------------|---------------------------|
| 35.9        | 11.3964                    | 11.2951                    | 10.7453                    | 5.0465                    |
| 26.9        | 11.3881                    | 11.2854                    | 10.7166                    | 5.0386                    |
| 20.2        | 11.3807                    | 11.2817                    | 10.6863                    | 5.0312                    |
| 15.1        | 11.3721                    | 11.2837                    | 10.6492                    | 5.0207                    |
| 11.4        | 11.3612                    | 11.2936                    | 10.6031                    | 5.0087                    |
| 8.5         | 11.3517                    | -*                         | 10.5603                    | 4.9938                    |
| 6.4         | 11.3345                    | -*                         | 10.5124                    | 4.9739                    |
| 4.8         | 11.3305                    | -*                         | 10.4680                    | 4.9580                    |
| 3.6         | 11.3255                    | -*                         | 10.4121                    | 4.9323                    |
| 2.7         | 11.3170                    | -*                         | 10.3535                    | 4.9040                    |
| 2.0         | 11.3106                    | -*                         | 10.3194                    | 4.8718                    |
| 1.5         | 11.2973                    | -*                         | 10.2963                    | 4.8413                    |
| 0           | -                          | -*                         | -                          | 4.6830                    |

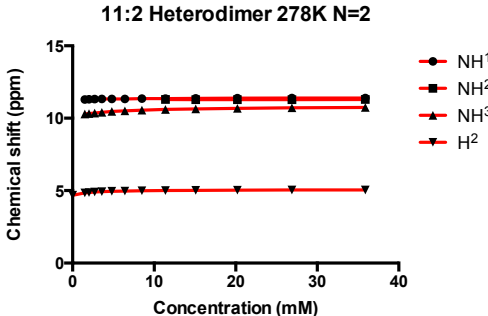

**K<sub>DIM</sub> = 9,679 M<sup>-1</sup>**

\*Broadened signal

**sigma = 4.5**

**Table 81:** 11:2 Heterodimer <sup>1</sup>H NMR titration at 288 K

| [2]<br>(mM) | δ NH <sup>1</sup><br>(ppm) | δ NH <sup>2</sup><br>(ppm) | δ NH <sup>3</sup><br>(ppm) | δ H <sup>2</sup><br>(ppm) |
|-------------|----------------------------|----------------------------|----------------------------|---------------------------|
| 35.9        | 11.3490                    | 11.1750                    | 10.6814                    | 5.0343                    |
| 26.9        | 11.3415                    | 11.1566                    | 10.6521                    | 5.0251                    |
| 20.2        | 11.3335                    | 11.1549                    | 10.6204                    | 5.0153                    |
| 15.1        | 11.3229                    | 11.1436                    | 10.5812                    | 5.0008                    |
| 11.4        | 11.3109                    | 11.1412                    | 10.5355                    | 4.9835                    |
| 8.5         | 11.3002                    | 11.1406                    | 10.4923                    | 4.9657                    |
| 6.4         | 11.2879                    | 11.1523                    | 10.4392                    | 4.9434                    |
| 4.8         | 11.2777                    | 11.1687                    | 10.3920                    | 4.9178                    |
| 3.6         | 11.2684                    | -*                         | 10.3442                    | 4.8914                    |
| 2.7**       | 11.2594                    | -*                         | 10.3075                    | 4.8562                    |
| 2.0**       | 11.2517                    | -*                         | 10.2724                    | 4.8192                    |
| 1.5**       | 11.2465                    | -*                         | 10.2528                    | 4.7862                    |
| 0           | -                          | -                          | -                          | 4.6363                    |

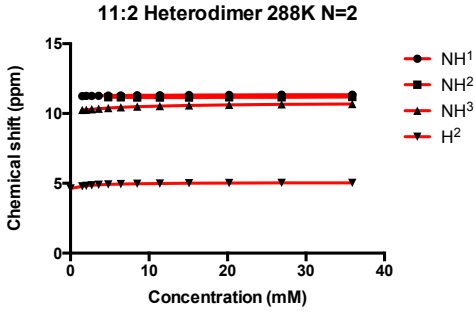

**K<sub>DIM</sub> = 5346 M<sup>-1</sup>**

\*Obscured by another proton signal

\*\*Outlier not included in K<sub>Het</sub> determination

**sigma = 3.6**



**Table 82:** 11:2 Heterodimer  $^1\text{H}$  NMR titration at 295 K

| [2]<br>(mM) | $\delta$ NH <sup>1</sup><br>(ppm) | $\delta$ NH <sup>2</sup><br>(ppm) | $\delta$ NH <sup>3</sup><br>(ppm) | $\delta$ H <sup>2</sup><br>(ppm) |
|-------------|-----------------------------------|-----------------------------------|-----------------------------------|----------------------------------|
| 35.9        | 11.3139                           | 11.0727                           | 10.6310                           | 5.0211                           |
| 26.9        | 11.3056                           | 11.0582                           | 10.5996                           | 5.0095                           |
| 20.2        | 11.2970                           | 11.0455                           | 10.5665                           | 4.9972                           |
| 15.1        | 11.2849                           | 11.0303                           | 10.5246                           | 4.9790                           |
| 11.4        | 11.2772                           | 11.0201                           | 10.4787                           | 4.9593                           |
| 8.5         | 11.2606                           | 11.0105                           | 10.4347                           | 4.9380                           |
| 6.4         | 11.2484                           | 11.0136                           | 10.3843                           | 4.9100                           |
| 4.8         | 11.2370                           | 11.0175                           | 10.3383                           | 4.8835                           |
| 3.6         | 11.2280                           | 11.0388                           | 10.2954                           | 4.8530                           |
| 2.7         | 11.2182                           | 11.0342                           | 10.2588                           | 4.8166                           |
| 2.0         | 11.2123                           | -*                                | 10.2278                           | 4.7778                           |
| 1.5         | 11.2076                           | -*                                | 10.2079                           | 4.7421                           |
| 0           | -                                 | -                                 | -                                 | 4.5564                           |

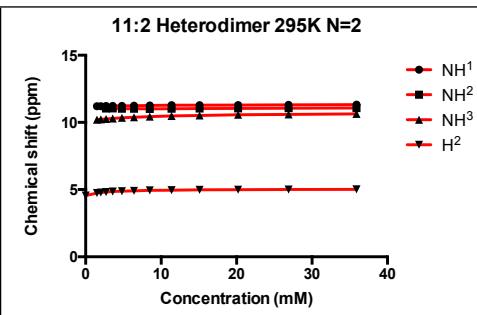

$K_{\text{DIM}} = 3351 \text{ M}^{-1}$        $\sigma = 12.4$

\*Broadened signal

**Table 83:** 11:2 Heterodimer  $^1\text{H}$  NMR titration at 298 K

| [2]<br>(mM) | $\delta$ NH <sup>1</sup><br>(ppm) | $\delta$ NH <sup>2</sup><br>(ppm) | $\delta$ NH <sup>3</sup><br>(ppm) | $\delta$ H <sup>2</sup><br>(ppm) |
|-------------|-----------------------------------|-----------------------------------|-----------------------------------|----------------------------------|
| 35.9        | 11.3002                           | 11.0343                           | 10.6105                           | 5.0156                           |
| 26.9        | 11.2901                           | 11.0151                           | 10.5764                           | 5.0017                           |
| 20.2        | 11.2805                           | 10.9979                           | 10.5414                           | 4.9878                           |
| 15.1        | 11.2689                           | 10.9801                           | 10.4999                           | 4.9688                           |
| 11.4        | 11.2557                           | 10.9695                           | 10.4532                           | 4.9480                           |
| 8.5         | 11.2435                           | 10.9525                           | 10.4087                           | 4.9242                           |
| 6.4         | 11.2297                           | 10.9482                           | 10.3572                           | 4.8962                           |
| 4.8         | 11.2182                           | 10.9481                           | 10.3119                           | 4.8666                           |
| 3.6         | 11.2092                           | 10.9662                           | 10.2707                           | 4.8351                           |
| 2.7         | 11.1992                           | 10.9552                           | 10.2339                           | 4.7953                           |
| 2.0         | 11.1927                           | 10.9860                           | 10.2034                           | 4.7597                           |
| 1.5         | 11.1872                           | 10.9932                           | 10.1821                           | 4.7222                           |
| 0           | -                                 | -                                 | -                                 | 4.5300                           |

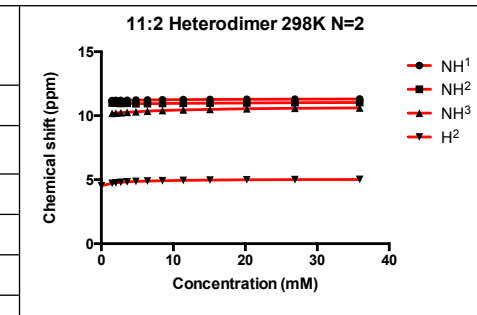

$K_{\text{DIM}} = 2218 \text{ M}^{-1}$        $\sigma = 14.0$

**Table 84:** 11:2 Heterodimer <sup>1</sup>H NMR titration at 308 K

| [2]<br>(mM) | δ NH <sup>1</sup><br>(ppm) | δ NH <sup>2</sup><br>(ppm) | δ NH <sup>3</sup><br>(ppm) | δ H <sup>2</sup><br>(ppm) |
|-------------|----------------------------|----------------------------|----------------------------|---------------------------|
| 35.9        | 11.2428                    | 10.8763                    | 10.5224                    | 4.9856                    |
| 26.9        | 11.2323                    | 10.8488                    | 10.4857                    | 4.9680                    |
| 20.2        | 11.2208                    | 10.8206                    | 10.4466                    | 4.9487                    |
| 15.1        | 11.2065                    | 10.7890                    | 10.4009                    | 4.9238                    |
| 11.4        | 11.1918                    | 10.7617                    | 10.3520                    | 4.8966                    |
| 8.5         | 11.1776                    | 10.7321                    | 10.3052                    | 4.8658                    |
| 6.4         | 11.1636                    | 10.7126                    | 10.2551                    | 4.8323                    |
| 4.8         | 11.1506                    | 10.6935                    | 10.2098                    | 4.7964                    |
| 3.6         | 11.1415                    | 10.6967                    | 10.1724                    | 4.7659                    |
| 2.7         | 11.1282                    | 10.6614                    | 10.1312                    | 4.7206                    |
| 2.0         | 11.1225                    | 10.6809                    | 10.1042                    | 4.6844                    |
| 1.5         | 11.1142                    | 10.6663                    | 10.0776                    | 4.6468                    |
| 0           | -                          | -                          | -                          | 4.4740                    |

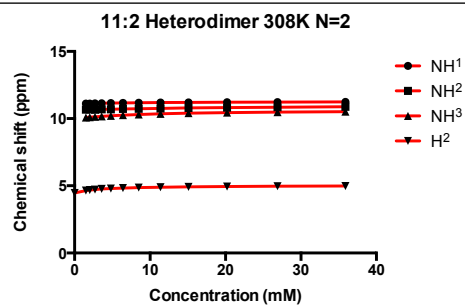 $K_{DIM} = 1205 \text{ M}^{-1}$ 

sigma = 7.9

### 2.5.3. 11:2 Heterodimer <sup>1</sup>H NMR Titration Experiment 3

Peptide concentration: 3.2 mM

**Table 85:** 11:2 Heterodimer <sup>1</sup>H NMR titration at 278 K

| [2]<br>(mM) | δ NH <sup>1</sup><br>(ppm) | δ NH <sup>2</sup><br>(ppm) | δ NH <sup>3</sup><br>(ppm) | δ H <sup>2</sup><br>(ppm) |
|-------------|----------------------------|----------------------------|----------------------------|---------------------------|
| 34.3        | 11.3982                    | 11.2954                    | 10.7459                    | 5.0475                    |
| 25.7        | 11.3904                    | 11.2873                    | 10.7184                    | 5.0407                    |
| 19.3        | 11.3813                    | 11.2821                    | 10.6851                    | 5.0314                    |
| 14.5        | 11.3730                    | 11.2811                    | 10.6516                    | 5.0211                    |
| 10.9        | 11.3632                    | 11.2869                    | 10.6056                    | 5.0055                    |
| 8.1         | 11.3557                    | -*                         | 10.5779                    | 4.9919                    |
| 6.1         | 11.3448                    | -*                         | 10.5237                    | 4.9782                    |
| 4.6         | 11.3319                    | -*                         | 10.4781                    | 4.9575                    |
| 3.4         | 11.3265                    | -*                         | 10.4155                    | 4.9356                    |
| 2.6**       | 11.3102                    | -*                         | 10.3624                    | 4.9062                    |
| 1.9**       | 11.3044                    | -***                       | 10.3233                    | 4.8759                    |
| 1.4**       | 11.2979                    | -***                       | 10.2948                    | 4.8406                    |
| 0           | -                          | -                          | -                          | 4.6766                    |

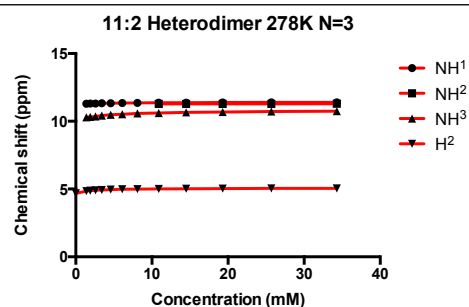

$K_{DIM} = 11,876 \text{ M}^{-1}$        $\sigma = 8.23$

\*Obscured by another proton signal

\*\* Outlier not included in  $K_{Het}$  determination

\*\*\*Broadened signal

**Table 86:** 11:2 Heterodimer <sup>1</sup>H NMR titration at 288 K

| [2]<br>(mM) | δ NH <sup>1</sup><br>(ppm) | δ NH <sup>2</sup><br>(ppm) | δ NH <sup>3</sup><br>(ppm) | δ H <sup>2</sup><br>(ppm) |
|-------------|----------------------------|----------------------------|----------------------------|---------------------------|
| 34.3        | 11.3506                    | 11.1715                    | 10.6815                    | 5.0357                    |
| 25.7        | 11.3421                    | 11.1574                    | 10.6519                    | 5.0255                    |
| 19.3        | 11.3334                    | 11.1499                    | 10.6180                    | 5.0141                    |
| 14.5        | 11.3239                    | 11.1403                    | 10.5829                    | 5.0010                    |
| 10.9        | 11.3112                    | 11.1427                    | 10.5331                    | 4.9846                    |
| 8.1         | 11.3012                    | 11.1424                    | 10.4903                    | 4.9685                    |
| 6.1         | 11.2897                    | 11.1515                    | 10.4418                    | 4.9443                    |
| 4.6         | 11.2782                    | -*                         | 10.3895                    | 4.9163                    |
| 3.4         | 11.2687                    | -*                         | 10.3464                    | 4.8893                    |
| 2.6         | 11.2599                    | -**                        | 10.3040                    | 4.8565                    |
| 1.9         | 11.2528                    | -**                        | 10.2742                    | 4.8206                    |
| 1.4         | 11.2469                    | -**                        | 10.2511                    | 4.7836                    |
| 0           | -                          | -                          | -                          | 4.6197                    |

**K<sub>DIM</sub> = 5675 M<sup>-1</sup>      sigma = 13.5**  
 \*Broadened signal  
 \*\*Obscured by another proton signal

**Table 87:** 11:2 Heterodimer <sup>1</sup>H NMR titration at 295 K

| [2]<br>(mM) | δ NH <sup>1</sup><br>(ppm) | δ NH <sup>2</sup><br>(ppm) | δ NH <sup>3</sup><br>(ppm) | δ H <sup>2</sup><br>(ppm) |
|-------------|----------------------------|----------------------------|----------------------------|---------------------------|
| 34.3        | 11.3153                    | 11.0736                    | 10.6307                    | 5.0224                    |
| 25.7        | 11.3061                    | 11.0553                    | 10.5991                    | 5.0101                    |
| 19.3        | 11.2964                    | 11.0429                    | 10.5632                    | 4.9959                    |
| 14.5        | 11.2857                    | 11.0321                    | 10.5258                    | 4.9790                    |
| 10.9        | 11.2724                    | 11.0220                    | 10.4762                    | 4.9598                    |
| 8.1         | 11.2615                    | 11.0124                    | 10.4332                    | 4.9390                    |
| 6.1         | 11.2491                    | 11.0099                    | 10.3854                    | 4.9149                    |
| 4.6         | 11.2375                    | 11.0165                    | 10.3372                    | 4.8827                    |
| 3.4         | 11.2271                    | 11.0224                    | 10.2948                    | 4.8503                    |
| 2.6         | 11.2185                    | 11.0412                    | 10.2562                    | 4.8133                    |
| 1.9*        | 11.2114                    | 11.0487                    | 10.2273                    | 4.7775                    |
| 1.4*        | 11.2065                    | 11.0712                    | 10.2046                    | 4.7393                    |
| 0           | -                          | -                          | -                          | 4.5186                    |

**K<sub>DIM</sub> = 4170 M<sup>-1</sup>      sigma = 9.6**  
 \*Outlier not included in K<sub>Het</sub> determination

| <b>Table 88: 11:2 Heterodimer <sup>1</sup>H NMR titration at 298 K</b> |                            |                            |                            |                           |
|------------------------------------------------------------------------|----------------------------|----------------------------|----------------------------|---------------------------|
| [2]<br>(mM)                                                            | δ NH <sup>1</sup><br>(ppm) | δ NH <sup>2</sup><br>(ppm) | δ NH <sup>3</sup><br>(ppm) | δ H <sup>2</sup><br>(ppm) |
| 34.3                                                                   | 11.3003                    | 11.0332                    | 10.6086                    | 5.0156                    |
| 25.7                                                                   | 11.2913                    | 11.0148                    | 10.5762                    | 5.0027                    |
| 19.3                                                                   | 11.2799                    | 10.9943                    | 10.5380                    | 4.9866                    |
| 14.5                                                                   | 11.2696                    | 10.9759                    | 10.5007                    | 4.9689                    |
| 10.9                                                                   | 11.2557                    | 10.9668                    | 10.4504                    | 4.9395                    |
| 8.1                                                                    | 11.2433                    | 10.9529                    | 10.4062                    | 4.9253                    |
| 6.1                                                                    | 11.2302                    | 10.9449                    | 10.3580                    | 4.8979                    |
| 4.6                                                                    | 11.2185                    | 10.9462                    | 10.3106                    | 4.8677                    |
| 3.4                                                                    | 11.2077                    | 10.9467                    | 10.2688                    | 4.8301                    |
| 2.6*                                                                   | 11.1989                    | 10.9587                    | 10.2309                    | 4.7930                    |
| 1.9*                                                                   | 11.1913                    | 10.9613                    | 10.2016                    | 4.7556                    |
| 1.4*                                                                   | 11.1869                    | 10.9799                    | 10.1794                    | 4.7183                    |
| 0                                                                      | -                          | -                          | -                          | 4.5004                    |

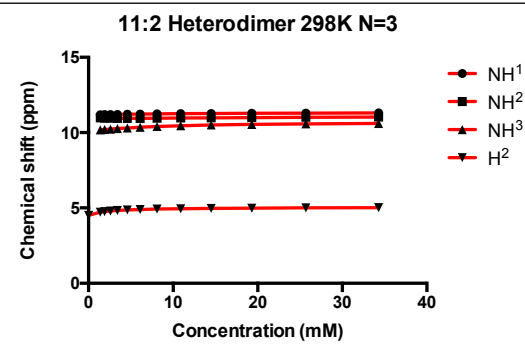

**K<sub>DIM</sub> = 2552 M<sup>-1</sup>      sigma = 7.9**  
\*Outlier not included in K<sub>Het</sub> determination

| <b>Table 89: 11:2 Heterodimer <sup>1</sup>H NMR titration at 308 K</b> |                            |                            |                            |                           |
|------------------------------------------------------------------------|----------------------------|----------------------------|----------------------------|---------------------------|
| [2]<br>(mM)                                                            | δ NH <sup>1</sup><br>(ppm) | δ NH <sup>2</sup><br>(ppm) | δ NH <sup>3</sup><br>(ppm) | δ H <sup>2</sup><br>(ppm) |
| 34.3                                                                   | 11.2433                    | 10.8741                    | 10.5204                    | 4.9856                    |
| 25.7                                                                   | 11.2330                    | 10.8465                    | 10.4846                    | 4.9686                    |
| 19.3                                                                   | 11.2198                    | 10.8154                    | 10.4424                    | 4.9463                    |
| 14.5                                                                   | 11.2069                    | 10.7840                    | 10.4007                    | 4.9220                    |
| 10.9                                                                   | 11.1912                    | 10.7580                    | 10.3483                    | 4.8949                    |
| 8.1                                                                    | 11.1777                    | 10.7314                    | 10.3024                    | 4.8716                    |
| 6.1                                                                    | 11.1639                    | 10.7067                    | 10.2550                    | 4.8377                    |
| 4.6                                                                    | 11.1503                    | 10.6883                    | 10.2077                    | 4.8013                    |
| 3.4                                                                    | 11.1385                    | 10.6708                    | 10.1663                    | 4.7582                    |
| 2.6                                                                    | 11.1279                    | 10.6618                    | 10.1284                    | 4.7173                    |
| 1.9*                                                                   | 11.1186                    | 10.6461                    | 10.0969                    | 4.6802                    |
| 1.4*                                                                   | 11.1117                    | 10.6449                    | 10.0714                    | 4.4623                    |
| 0                                                                      | -                          | -                          | -                          | 4.3857                    |

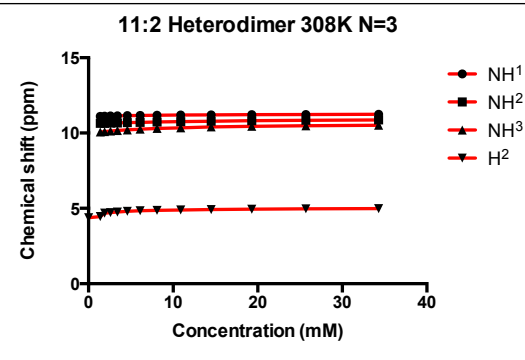

**K<sub>DIM</sub> = 1818 M<sup>-1</sup>      sigma = 10.0**  
\*Outlier not included in K<sub>Het</sub> determination

## 2.5.4. 11:2 Heterodimer VT <sup>1</sup>H NMR Summary and Van't Hoff Plots

**Table 90:** Summary of 11:2 Heterodimer Experiment 1 and Van't Hoff Plot

| Temp (K) | K <sub>Het</sub> (M <sup>-1</sup> ) | 1/T         | lnK         |
|----------|-------------------------------------|-------------|-------------|
| 278      | 13,433                              | 0.003597122 | 9.505469645 |
| 288      | 5530                                | 0.003472222 | 8.617943095 |
| 295      | 3182                                | 0.003389831 | 8.065265209 |
| 298      | 2095                                | 0.003355705 | 7.647308832 |
| 308      | 1178                                | 0.003246753 | 7.071573364 |

**Table 91:** Summary of 11:2 Heterodimer Experiment 2 and Van't Hoff Plot

| Temp (K) | K <sub>Het</sub> (M <sup>-1</sup> ) | 1/T         | lnK         |
|----------|-------------------------------------|-------------|-------------|
| 278      | 9,679                               | 0.003597122 | 9.177713869 |
| 288      | 5,346                               | 0.003472222 | 8.584103897 |
| 295      | 3351                                | 0.003389831 | 8.117014088 |
| 298      | 2218                                | 0.003355705 | 7.704361168 |
| 308      | 1205                                | 0.003246753 | 7.094234846 |

**Table 92:** Summary of 11:2 Heterodimer Experiment 3 and Van't Hoff Plot

| Temp (K) | K <sub>Het</sub> (M <sup>-1</sup> ) | 1/T         | lnK         |
|----------|-------------------------------------|-------------|-------------|
| 278      | 11,876                              | 0.003597122 | 9.382274836 |
| 288      | 5,675                               | 0.003472222 | 8.643825842 |
| 295      | 4170                                | 0.003389831 | 8.335671315 |
| 298      | 2552                                | 0.003355705 | 7.844632644 |
| 308      | 1818                                | 0.003246753 | 7.505492275 |

**Table 93:** Summary of thermodynamic parameters for 11:2 heterodimer

| Expt           | ΔH (kcal mol <sup>-1</sup> ) | -TΔS <sup>295 K</sup> (kcal mol <sup>-1</sup> ) | ΔG (kcal mol <sup>-1</sup> ) |
|----------------|------------------------------|-------------------------------------------------|------------------------------|
| N1             | -14.0                        | 9.3                                             | - 4.7                        |
| N2             | -12.0                        | 7.3                                             | - 4.7                        |
| N3             | -11.6                        | 6.1                                             | - 5.5                        |
| <b>Average</b> | <b>-12.5</b>                 | <b>7.6</b>                                      | <b>- 5.0</b>                 |

## 2.6. 11:2a Heterodimer VT <sup>1</sup>H NMR Titration Experiment

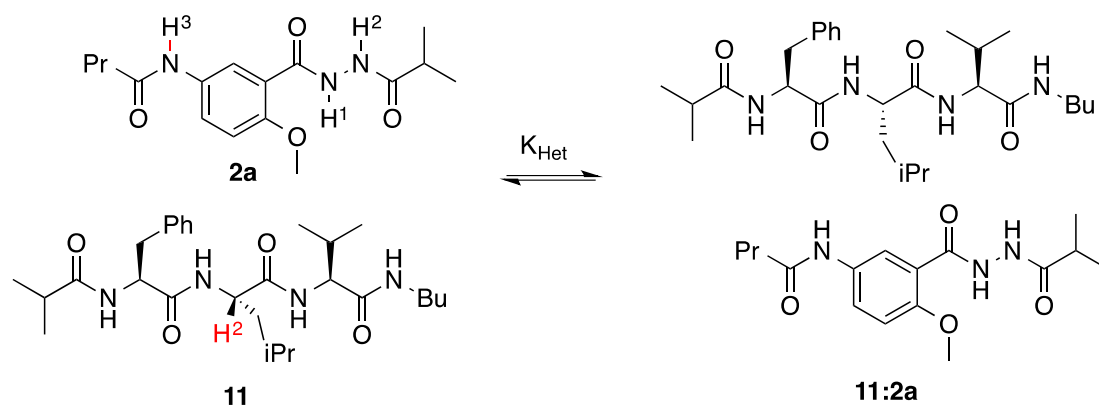

**Figure 7:** Heterodimerisation of **2a** and **11**. Resonances used to determine binding constants are highlighted in red.

**N.B.**  $K_{Het}$  was calculated on using  $H^2$  only. Shifts of NH signals in **2a** were broad and therefore not included in  $K_{Het}$  calculation.

### 2.6.1. 11:2a Heterodimer <sup>1</sup>H NMR Titration Experiment 1

Peptide concentration: 3.1 mM

| [2a] (mM) | $\delta$ NH <sup>1</sup> (ppm) | $\delta$ NH <sup>2</sup> (ppm) | $\delta$ NH <sup>3</sup> (ppm) | $\delta$ H <sup>2</sup> (ppm) |
|-----------|--------------------------------|--------------------------------|--------------------------------|-------------------------------|
| 36.9      | -                              | -                              | -                              | 5.2081                        |
| 27.6      | -                              | -                              | -                              | 5.2011                        |
| 20.7      | -                              | -                              | -                              | 5.1957                        |
| 15.5      | -                              | -                              | -                              | 5.1860                        |
| 11.7      | -                              | -                              | -                              | 5.1758                        |
| 8.7       | -                              | -                              | -                              | 5.1540                        |
| 6.6       | -                              | -                              | -                              | 5.1336                        |
| 4.9       | -                              | -                              | -                              | 5.1053                        |
| 3.7       | -                              | -                              | -                              | 5.0630                        |
| 2.8       | -                              | -                              | -                              | 5.0170                        |
| 2.1       | -                              | -                              | -                              | 4.9541                        |
| 1.6       | -                              | -                              | -                              | 4.9054                        |
| 0         | -                              | -                              | -                              | 4.6751                        |

**11:2a Heterodimer 278K**

Chemical shift (ppm)

Conc (mM)

$K_{Het} = 5923 \text{ M}^{-1}$ 
sigma = 22.09

**Table 95:** 11:2a Heterodimer <sup>1</sup>H NMR titration at 288 K

| [2a]<br>(mM) | δ NH <sup>1</sup><br>(ppm) | δ NH <sup>2</sup><br>(ppm) | δ NH <sup>3</sup><br>(ppm) | δ H <sup>2</sup><br>(ppm) |
|--------------|----------------------------|----------------------------|----------------------------|---------------------------|
| 36.9         | -                          | -                          | -                          | 5.1845                    |
| 27.6         | -                          | -                          | -                          | 5.1750                    |
| 20.7         | -                          | -                          | -                          | 5.1638                    |
| 15.5         | -                          | -                          | -                          | 5.1502                    |
| 11.7         | -                          | -                          | -                          | 5.1294                    |
| 8.7          | -                          | -                          | -                          | 5.1060                    |
| 6.6          | -                          | -                          | -                          | 5.0740                    |
| 4.9          | -                          | -                          | -                          | 5.0236                    |
| 3.7          | -                          | -                          | -                          | 4.9808                    |
| 2.8          | -                          | -                          | -                          | 4.9262                    |
| 2.1          | -                          | -                          | -                          | 4.8732                    |
| 1.6          | -                          | -                          | -                          | 4.8221                    |
| 0            | -                          | -                          | -                          | 4.6221                    |

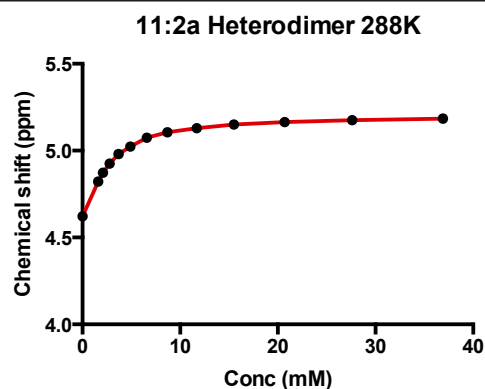 $K_{\text{Het}} = 2357 \text{ M}^{-1}$ 

sigma= 16.5

**Table 96:** 11:2a Heterodimer <sup>1</sup>H NMR titration at 295 K

| [2a]<br>(mM) | δ NH <sup>1</sup><br>(ppm) | δ NH <sup>2</sup><br>(ppm) | δ NH <sup>3</sup><br>(ppm) | δ H <sup>2</sup><br>(ppm) |
|--------------|----------------------------|----------------------------|----------------------------|---------------------------|
| 36.9         | -                          | -                          | -                          | 5.1609                    |
| 27.6         | -                          | -                          | -                          | 5.1479                    |
| 20.7         | -                          | -                          | -                          | 5.1335                    |
| 15.5         | -                          | -                          | -                          | 5.1141                    |
| 11.7         | -                          | -                          | -                          | 5.0901                    |
| 8.7          | -                          | -                          | -                          | 5.0570                    |
| 6.6          | -                          | -                          | -                          | 5.0160                    |
| 4.9          | -                          | -                          | -                          | 4.9654                    |
| 3.7          | -                          | -                          | -                          | 4.9115                    |
| 2.8          | -                          | -                          | -                          | 4.8575                    |
| 2.1          | -                          | -                          | -                          | 4.8050                    |
| 1.6          | -                          | -                          | -                          | 4.7594                    |
| 0            | -                          | -                          | -                          | 4.5339                    |

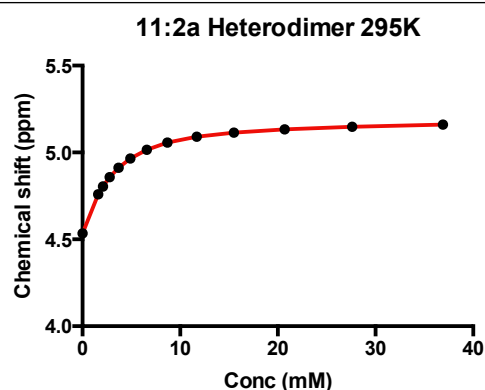 $K_{\text{Het}} = 1504 \text{ M}^{-1}$ 

sigma= 19.0



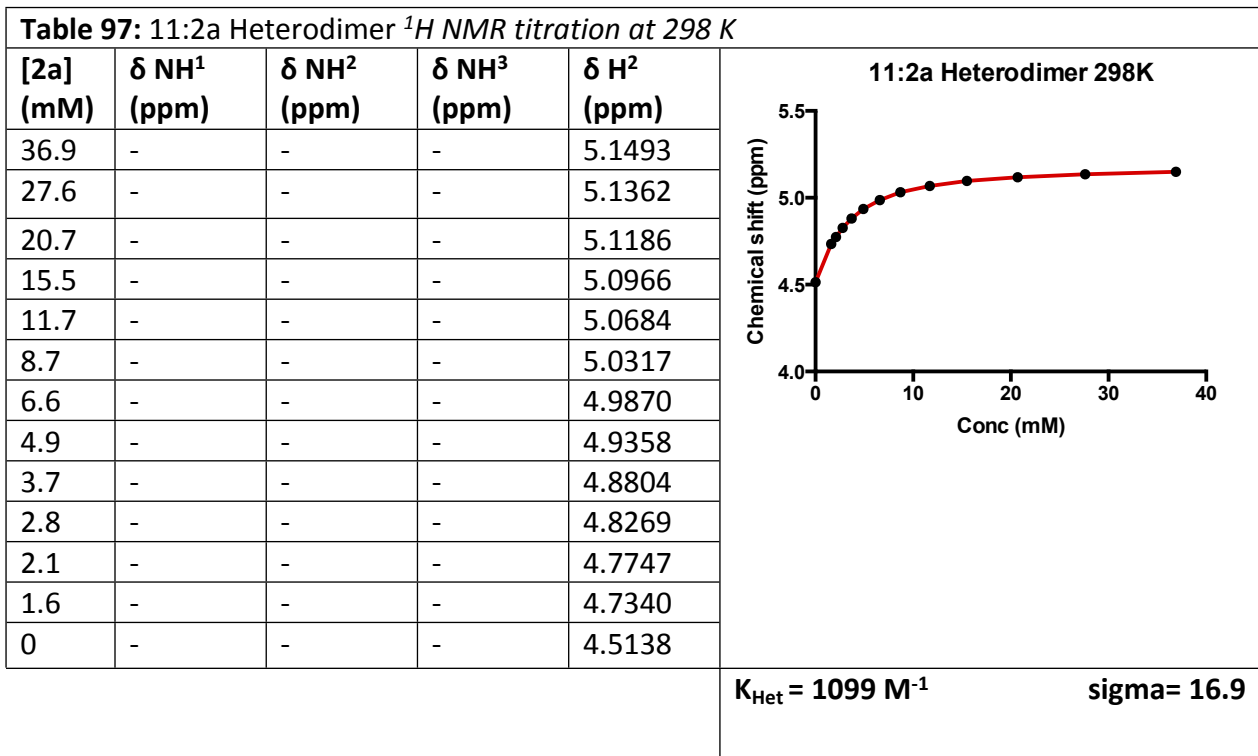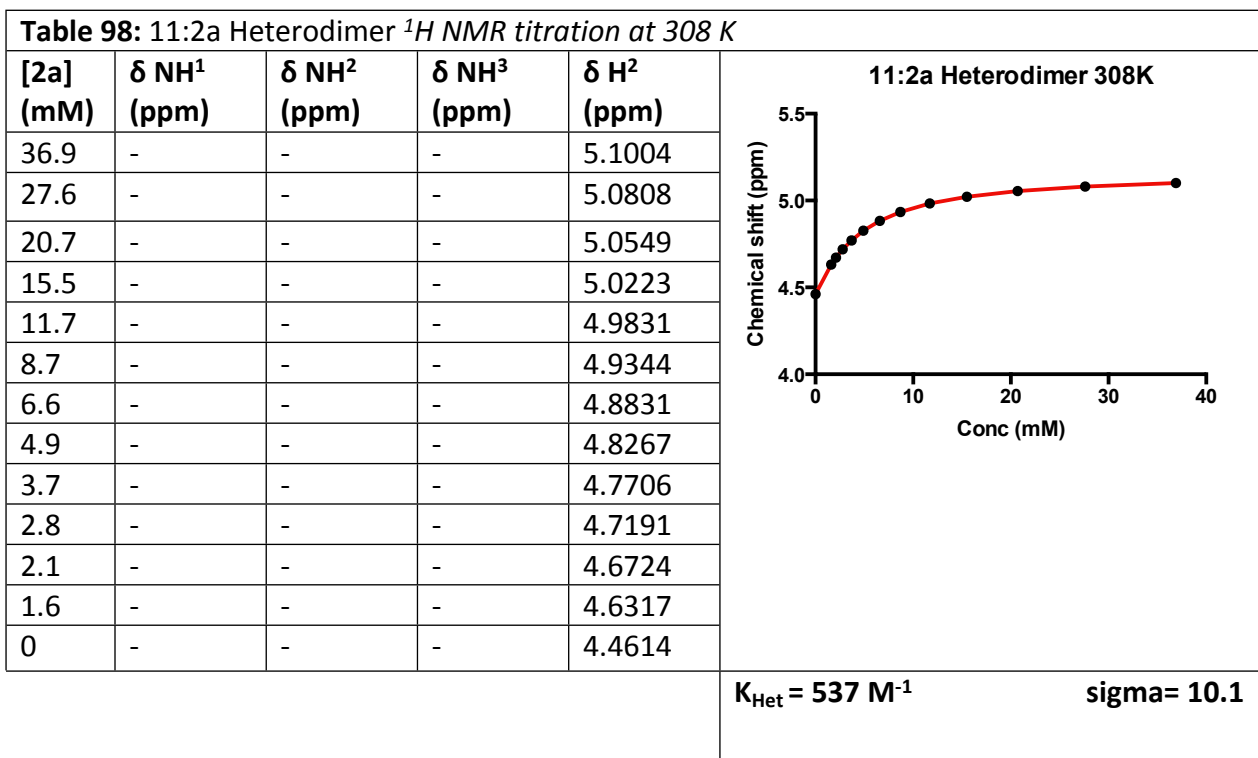

## 2.6.2. 11:2a Heterodimer <sup>1</sup>H NMR Titration Experiment 2

Peptide concentration: 3.1 mM

**Table 99:** 11:2a Heterodimer <sup>1</sup>H NMR titration at 278 K N=2

| [2a]<br>(mM) | δ NH <sup>1</sup><br>(ppm) | δ NH <sup>2</sup><br>(ppm) | δ NH <sup>3</sup><br>(ppm) | δ H <sup>2</sup><br>(ppm) |
|--------------|----------------------------|----------------------------|----------------------------|---------------------------|
| 37.9         | -                          | -                          | -                          | 5.2013                    |
| 28.4         | -                          | -                          | -                          | 5.1948                    |
| 21.3         | -                          | -                          | -                          | 5.1856                    |
| 16.0         | -                          | -                          | -                          | 5.1779                    |
| 12.0         | -                          | -                          | -                          | 5.1679                    |
| 9.0          | -                          | -                          | -                          | 5.1483                    |
| 6.7          | -                          | -                          | -                          | 5.1253                    |
| 5.1          | -                          | -                          | -                          | 5.0938                    |
| 3.8          | -                          | -                          | -                          | 5.0507                    |
| 2.8          | -                          | -                          | -                          | 4.9994                    |
| 2.1          | -                          | -                          | -                          | 4.9474                    |
| 0            | -                          | -                          | -                          | 4.6754                    |

**11:2a Heterodimer 278K N=2**

$K_{\text{Het}} = 4735 \text{ M}^{-1}$ 
sigma= 18.0

**Table 100:** 11:2a Heterodimer <sup>1</sup>H NMR titration at 288 K N=2

| [2a]<br>(mM) | δ NH <sup>1</sup><br>(ppm) | δ NH <sup>2</sup><br>(ppm) | δ NH <sup>3</sup><br>(ppm) | δ H <sup>2</sup><br>(ppm) |
|--------------|----------------------------|----------------------------|----------------------------|---------------------------|
| 37.9         | -                          | -                          | -                          | 5.1768                    |
| 28.4         | -                          | -                          | -                          | 5.1677                    |
| 21.3         | -                          | -                          | -                          | 5.1571                    |
| 16.0         | -                          | -                          | -                          | 5.1453                    |
| 12.0         | -                          | -                          | -                          | 5.1265                    |
| 9.0          | -                          | -                          | -                          | 5.1012                    |
| 6.7          | -                          | -                          | -                          | 5.0672                    |
| 5.1          | -                          | -                          | -                          | 5.0255                    |
| 3.8          | -                          | -                          | -                          | 4.9740                    |
| 2.8          | -                          | -                          | -                          | 4.9222                    |
| 2.1          | -                          | -                          | -                          | 4.8690                    |
| 0            | -                          | -                          | -                          | 4.6082                    |

**11:2a Heterodimer 288K N=2**

$K_{\text{Het}} = 2329 \text{ M}^{-1}$ 
sigma= 16.1

**Table 101:** 11:2a Heterodimer  $^1\text{H}$  NMR titration at 295 K N=2

| [2a]<br>(mM) | $\delta$ NH <sup>1</sup><br>(ppm) | $\delta$ NH <sup>2</sup><br>(ppm) | $\delta$ NH <sup>3</sup><br>(ppm) | $\delta$ H <sup>2</sup><br>(ppm) |
|--------------|-----------------------------------|-----------------------------------|-----------------------------------|----------------------------------|
| 37.9         | -                                 | -                                 | -                                 | 5.1534                           |
| 28.4         | -                                 | -                                 | -                                 | 5.1425                           |
| 21.3         | -                                 | -                                 | -                                 | 5.1277                           |
| 16.0         | -                                 | -                                 | -                                 | 5.1100                           |
| 12.0         | -                                 | -                                 | -                                 | 5.0858                           |
| 9.0          | -                                 | -                                 | -                                 | 5.0521                           |
| 6.7          | -                                 | -                                 | -                                 | 5.0103                           |
| 5.1          | -                                 | -                                 | -                                 | 4.9636                           |
| 3.8          | -                                 | -                                 | -                                 | 4.9101                           |
| 2.8          | -                                 | -                                 | -                                 | 4.8558                           |
| 2.1          | -                                 | -                                 | -                                 | 4.8054                           |
| 0            | -                                 | -                                 | -                                 | 4.5564                           |

**$K_{\text{Het}} = 1361 \text{ M}^{-1}$**

**sigma= 14.7**

**Table 102:** 11:2a Heterodimer  $^1\text{H}$  NMR titration at 298 K N=2

| [2a]<br>(mM) | $\delta$ NH <sup>1</sup><br>(ppm) | $\delta$ NH <sup>2</sup><br>(ppm) | $\delta$ NH <sup>3</sup><br>(ppm) | $\delta$ H <sup>2</sup><br>(ppm) |
|--------------|-----------------------------------|-----------------------------------|-----------------------------------|----------------------------------|
| 37.9         | -                                 | -                                 | -                                 | 5.1412                           |
| 28.4         | -                                 | -                                 | -                                 | 5.1296                           |
| 21.3         | -                                 | -                                 | -                                 | 5.1139                           |
| 16.0         | -                                 | -                                 | -                                 | 5.0919                           |
| 12.0         | -                                 | -                                 | -                                 | 5.0653                           |
| 9.0          | -                                 | -                                 | -                                 | 5.0291                           |
| 6.7          | -                                 | -                                 | -                                 | 4.9852                           |
| 5.1          | -                                 | -                                 | -                                 | 4.9350                           |
| 3.8          | -                                 | -                                 | -                                 | 4.8803                           |
| 2.8          | -                                 | -                                 | -                                 | 4.8273                           |
| 2.1          | -                                 | -                                 | -                                 | 4.7750                           |
| 0            | -                                 | -                                 | -                                 | 4.4646                           |

**$K_{\text{Het}} = 1240 \text{ M}^{-1}$**

**sigma= 20.3**

**Table 103:** 11:2a Heterodimer <sup>1</sup>H NMR titration at 308 K N=2

| [2a]<br>(mM) | δ NH <sup>1</sup><br>(ppm) | δ NH <sup>2</sup><br>(ppm) | δ NH <sup>3</sup><br>(ppm) | δ H <sup>2</sup><br>(ppm) |
|--------------|----------------------------|----------------------------|----------------------------|---------------------------|
| 37.9         | -                          | -                          | -                          | 5.0949                    |
| 28.4         | -                          | -                          | -                          | 5.0737                    |
| 21.3         | -                          | -                          | -                          | 5.0516                    |
| 16.0         | -                          | -                          | -                          | 5.0208                    |
| 12.0         | -                          | -                          | -                          | 4.9812                    |
| 9.0          | -                          | -                          | -                          | 4.9333                    |
| 6.7          | -                          | -                          | -                          | -*                        |
| 5.1          | -                          | -                          | -                          | -*                        |
| 3.8          | -                          | -                          | -                          | 4.7716                    |
| 2.8          | -                          | -                          | -                          | 4.7205                    |
| 2.1          | -                          | -                          | -                          | 4.6742                    |
| 0            | -                          | -                          | -                          | 4.4646                    |

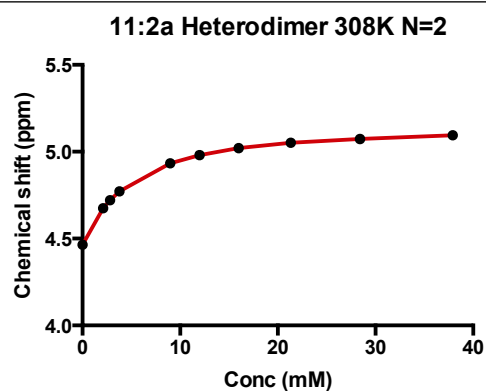 $K_{\text{Het}} = 565 \text{ M}^{-1}$ 

sigma= 11.0

\*Broadened signal

### 2.6.3. 11:2a Heterodimer <sup>1</sup>H NMR Titration Experiment 3

Peptide concentration: 3.3 mM

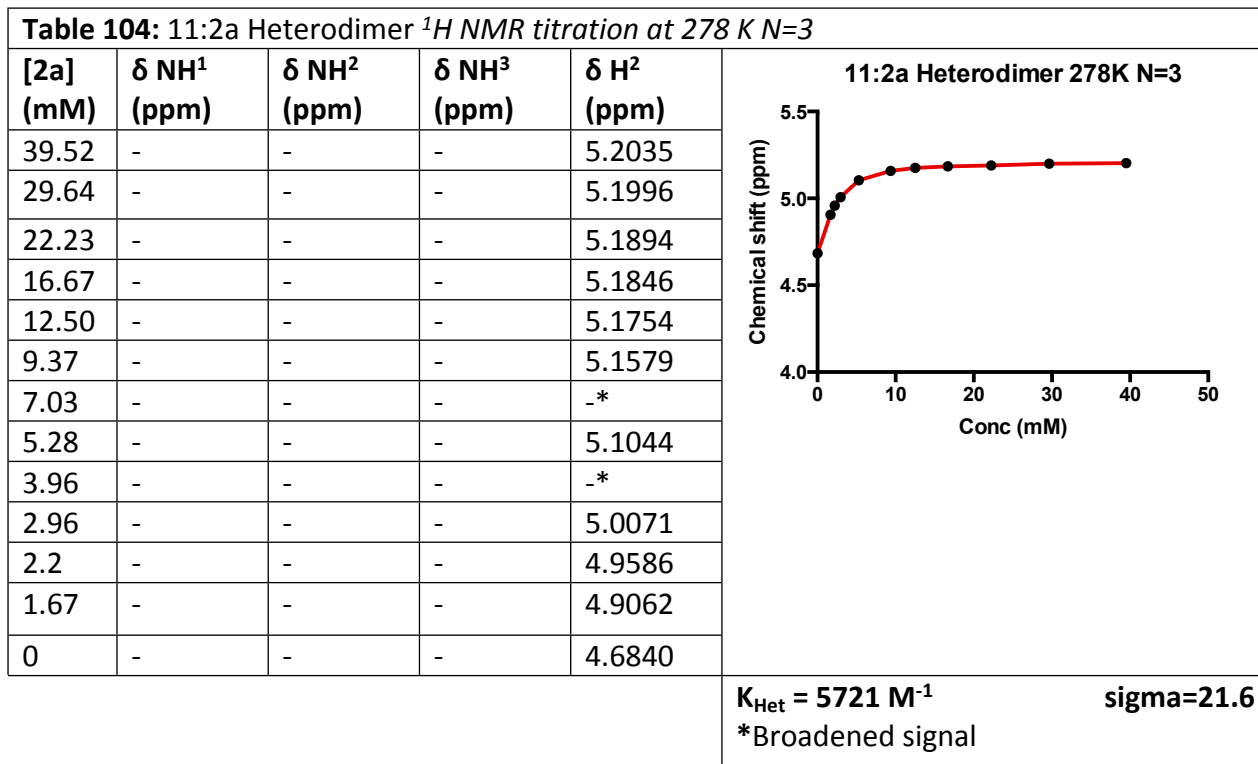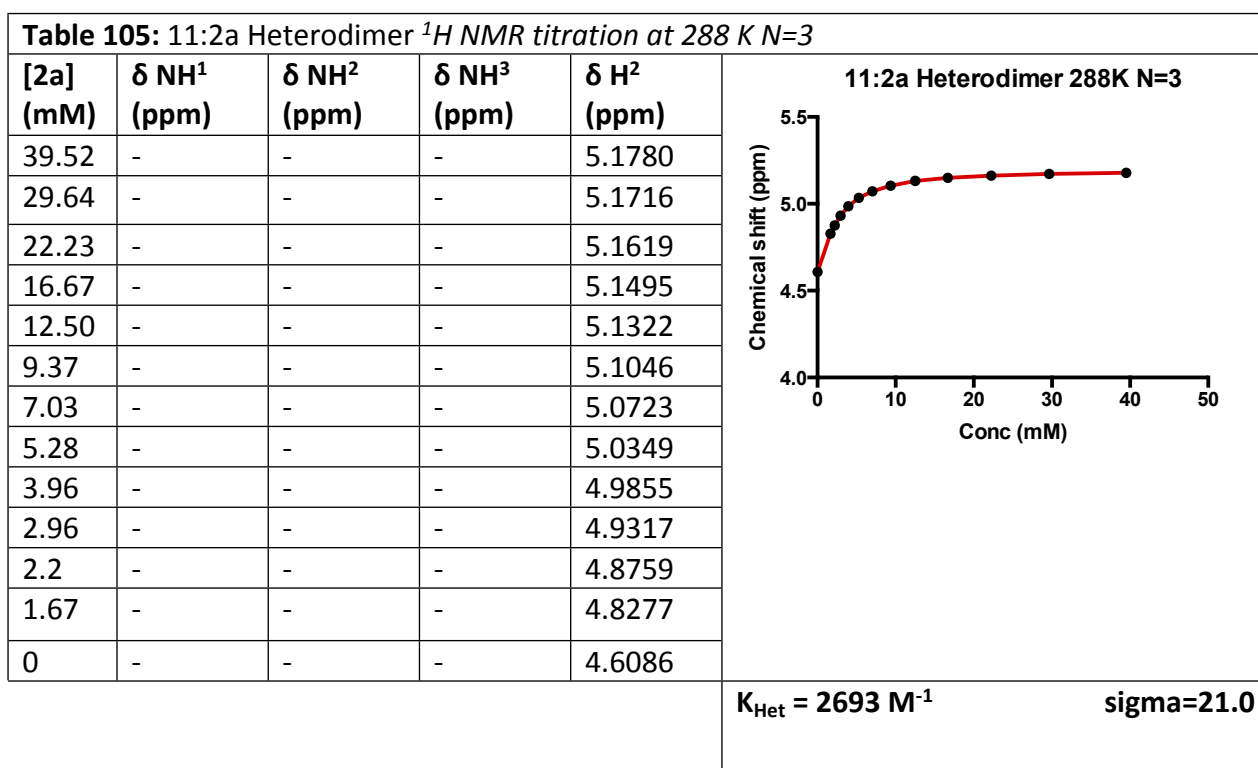

**Table 106:** 11:2a Heterodimer <sup>1</sup>H NMR titration at 295 K N=3

| [2a]<br>(mM) | δ NH <sup>1</sup><br>(ppm) | δ NH <sup>2</sup><br>(ppm) | δ NH <sup>3</sup><br>(ppm) | δ H <sup>2</sup><br>(ppm) |
|--------------|----------------------------|----------------------------|----------------------------|---------------------------|
| 39.52        | -                          | -                          | -                          | 5.1546                    |
| 29.64        | -                          | -                          | -                          | 5.1451                    |
| 22.23        | -                          | -                          | -                          | 5.1317                    |
| 16.67        | -                          | -                          | -                          | 5.1155                    |
| 12.50        | -                          | -                          | -                          | 5.0913                    |
| 9.37         | -                          | -                          | -                          | 5.0637                    |
| 7.03         | -                          | -                          | -                          | 5.0186                    |
| 5.28         | -                          | -                          | -                          | 4.9727                    |
| 3.96         | -                          | -                          | -                          | _*                        |
| 2.96         | -                          | -                          | -                          | 4.8642                    |
| 2.2          | -                          | -                          | -                          | 4.8193                    |
| 1.67         | -                          | -                          | -                          | _*                        |
| 0            |                            |                            |                            | _*                        |

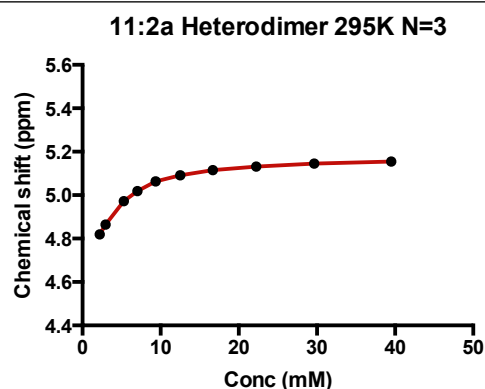 $K_{\text{Het}} = 1055 \text{ M}^{-1}$ 

sigma= 1.9

\_\*Broadened signal

**Table 107:** 11:2a Heterodimer <sup>1</sup>H NMR titration at 298 K N=3

| [2a]<br>(mM) | δ NH <sup>1</sup><br>(ppm) | δ NH <sup>2</sup><br>(ppm) | δ NH <sup>3</sup><br>(ppm) | δ H <sup>2</sup><br>(ppm) |
|--------------|----------------------------|----------------------------|----------------------------|---------------------------|
| 39.52        | -                          | -                          | -                          | 5.1438                    |
| 29.64        | -                          | -                          | -                          | 5.1334                    |
| 22.23        | -                          | -                          | -                          | 5.1176                    |
| 16.67        | -                          | -                          | -                          | 5.0984                    |
| 12.50        | -                          | -                          | -                          | 5.0718                    |
| 9.37         | -                          | -                          | -                          | 5.0397                    |
| 7.03         | -                          | -                          | -                          | 4.9930                    |
| 5.28         | -                          | -                          | -                          | 4.9416                    |
| 3.96         | -                          | -                          | -                          | 4.8886                    |
| 2.96         | -                          | -                          | -                          | 4.8348                    |
| 2.2          | -                          | -                          | -                          | 4.7885                    |
| 1.67         | -                          | -                          | -                          | _*                        |
| 0            |                            |                            |                            | _*                        |

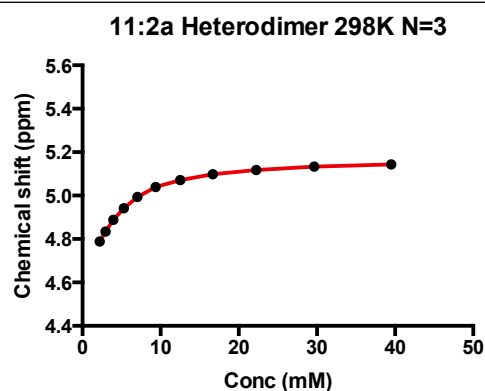 $K_{\text{Het}} = 863 \text{ M}^{-1}$ 

sigma= 1.57

\_\*Broadened signal

**Table 108:** 11:2a Heterodimer <sup>1</sup>H NMR titration at 308 K N=3

| [2a]<br>(mM) | δ NH <sup>1</sup><br>(ppm) | δ NH <sup>2</sup><br>(ppm) | δ NH <sup>3</sup><br>(ppm) | δ H <sup>2</sup><br>(ppm) |
|--------------|----------------------------|----------------------------|----------------------------|---------------------------|
| 39.52        | -                          | -                          | -                          | 5.0966                    |
| 29.64        | -                          | -                          | -                          | 5.0807                    |
| 22.23        | -                          | -                          | -                          | 5.0548                    |
| 16.67        | -                          | -                          | -                          | 5.0261                    |
| 12.50        | -                          | -                          | -                          | 4.9880                    |
| 9.37         | -                          | -                          | -                          | 4.9482                    |
| 7.03         | -                          | -                          | -                          | 4.8893                    |
| 5.28         | -                          | -                          | -                          | 4.8372                    |
| 3.96         | -                          | -                          | -                          | 4.7793                    |
| 2.96         | -                          | -                          | -                          | 4.7282                    |
| 2.2          | -                          | -                          | -                          | 4.6837                    |
| 1.67         | -                          | -                          | -                          | 4.6404                    |
| 0            |                            |                            |                            | 4.4666                    |

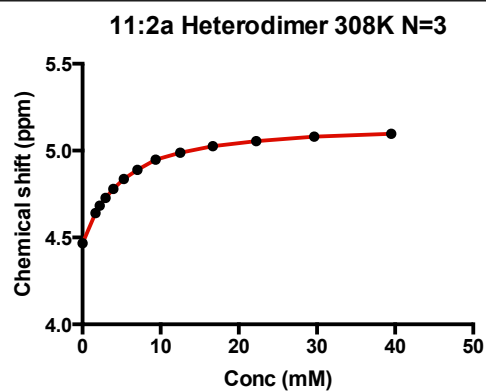 $K_{\text{Het}} = 574 \text{ M}^{-1}$ 

sigma= 11.7

## 2.6.4. 11:2a Heterodimer VT <sup>1</sup>H NMR Summary and Van't Hoff Plots

**Table 109:** Summary of 11:2a Heterodimer Experiment 1 and Van't Hoff Plot

| Temp (K) | K <sub>Het</sub> (M <sup>-1</sup> ) | 1/T         | lnK         |
|----------|-------------------------------------|-------------|-------------|
| 278      | 5,923                               | 0.003597122 | 8.686598356 |
| 288      | 2357                                | 0.003472222 | 7.765144903 |
| 295      | 1504                                | 0.003389831 | 7.315883505 |
| 298      | 1099                                | 0.003355705 | 7.002155954 |
| 308      | 537                                 | 0.003246753 | 6.285998095 |

**Table 110:** Summary of 11:2a Heterodimer Experiment 2 and Van't Hoff Plot

| Temp (K) | K <sub>Het</sub> (M <sup>-1</sup> ) | 1/T         | lnK         |
|----------|-------------------------------------|-------------|-------------|
| 278      | 4,735                               | 0.003597122 | 8.462737006 |
| 288      | 2329                                | 0.003472222 | 7.75319427  |
| 295      | 1361                                | 0.003389831 | 7.215975003 |
| 298      | 1240                                | 0.003355705 | 7.122866659 |
| 308      | 565                                 | 0.003246753 | 6.336825731 |

**Table 111:** Summary of 11:2a Heterodimer Experiment 3 and Van't Hoff Plot

| Temp (K) | K <sub>Het</sub> (M <sup>-1</sup> ) | 1/T         | lnK         |
|----------|-------------------------------------|-------------|-------------|
| 278      | 5,721                               | 0.003597122 | 8.651898894 |
| 288      | 2693                                | 0.003472222 | 7.898411093 |
| 295      | 1055                                | 0.003389831 | 6.961296046 |
| 298      | 863                                 | 0.003355705 | 6.760414691 |
| 308      | 574                                 | 0.003246753 | 6.352629396 |

**Table 112:** Summary of thermodynamic parameters for 11:2 heterodimer

| Expt           | ΔH (kcal mol <sup>-1</sup> ) | -TΔS <sup>295 K</sup> (kcal mol <sup>-1</sup> ) | ΔG (kcal mol <sup>-1</sup> ) |
|----------------|------------------------------|-------------------------------------------------|------------------------------|
| N1             | -13.5                        | 9.3                                             | - 4.2                        |
| N2             | -11.9                        | 7.7                                             | - 4.2                        |
| N3             | -13.9                        | 9.7                                             | - 4.2                        |
| <b>Average</b> | <b>-13.1</b>                 | <b>8.9</b>                                      | <b>- 4.2</b>                 |



## 2.7. ROESY Study of 2:11 Heterodimer

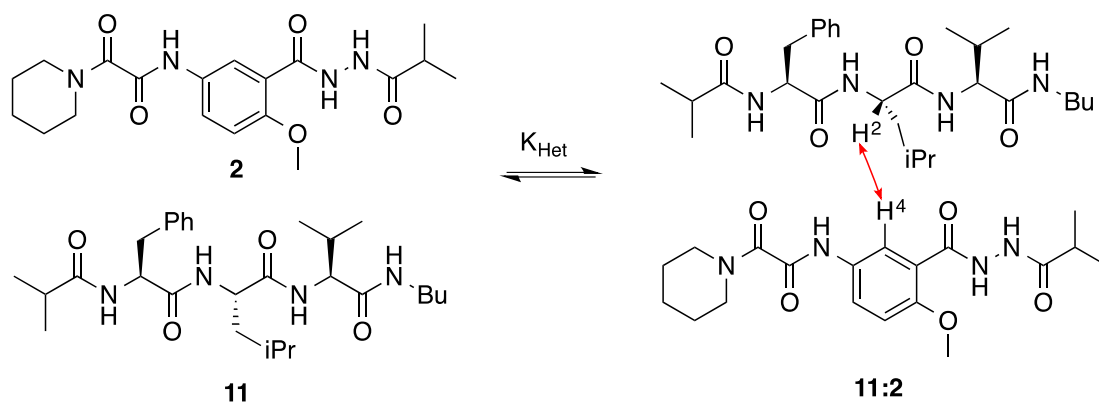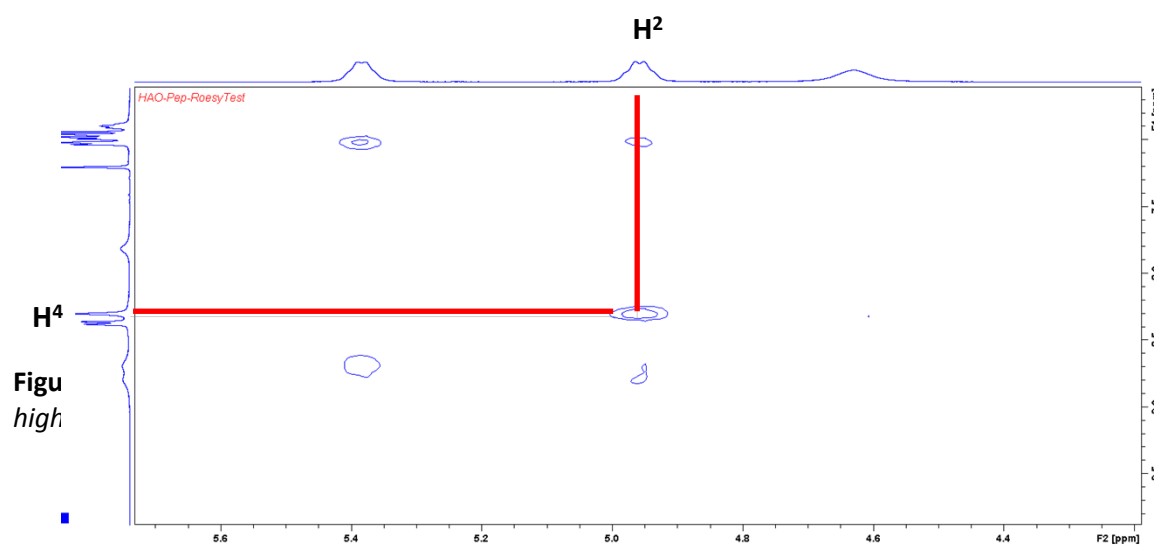

## References

- (1) S. Vedachalam, J. Zeng, B. K. Gorityala, M. Antonio and X.Liu, *Org. Lett.*, 2010, **12**, 352.
- (2) J. E. Thomson, C. D. Campbell, C. Concellon, N. Duguet, K. Rix, A. M. Z. Slawin, and A. D. Smith, *J. Org. Chem.*, 2008, **73**, 2784.
- (3) J. S. Nowick, M.D. Chung, K. Maitra, S. Mairita, K. D. Stigers and Y. Sun, *J. Am. Chem. Soc.*, 2000, **122**, 7654.
- (4) D. L. Holmes, E. M. Smith and J. S. Nowick, *J. Am. Chem. Soc.*, 1997, **119**, 7665.

# <sup>1</sup>H and <sup>13</sup>C NMR Spectra

<sup>1</sup>H NMR (500 MHz, CDCl<sub>3</sub>)

*N*-(6-nitro-4-oxo-4*H*-chromen-3-yl)butyramide (6)

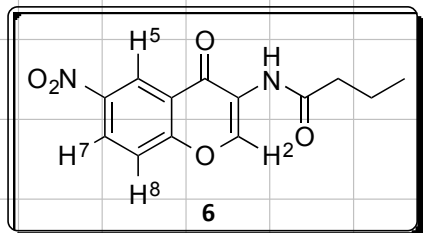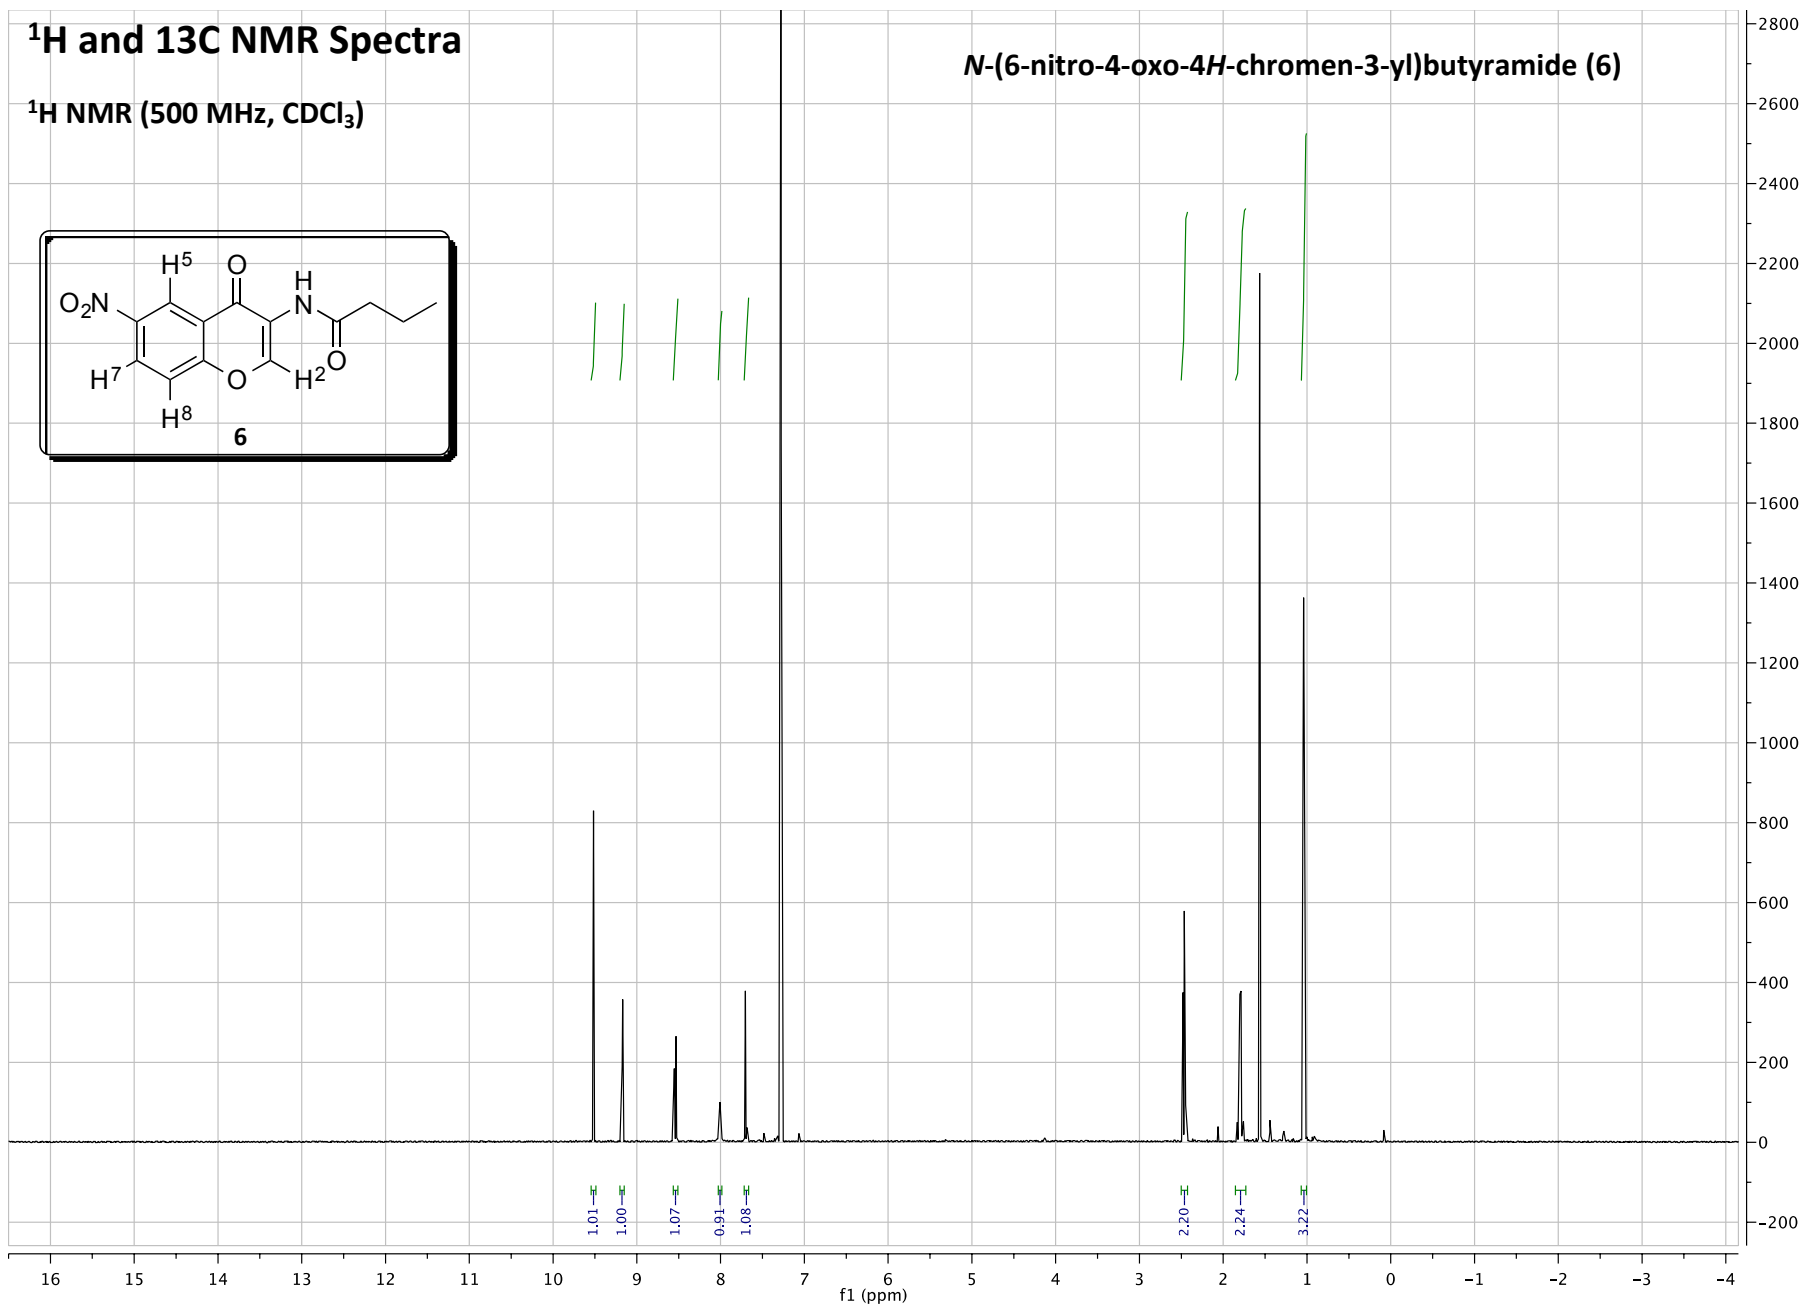

<sup>13</sup>C NMR (126 MHz, CDCl<sub>3</sub>)

*N*-(6-nitro-4-oxo-4*H*-chromen-3-yl)butyramide (6)

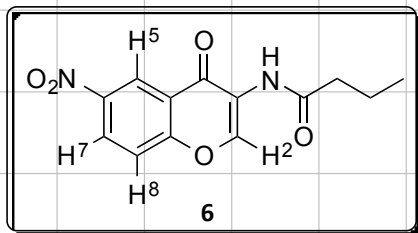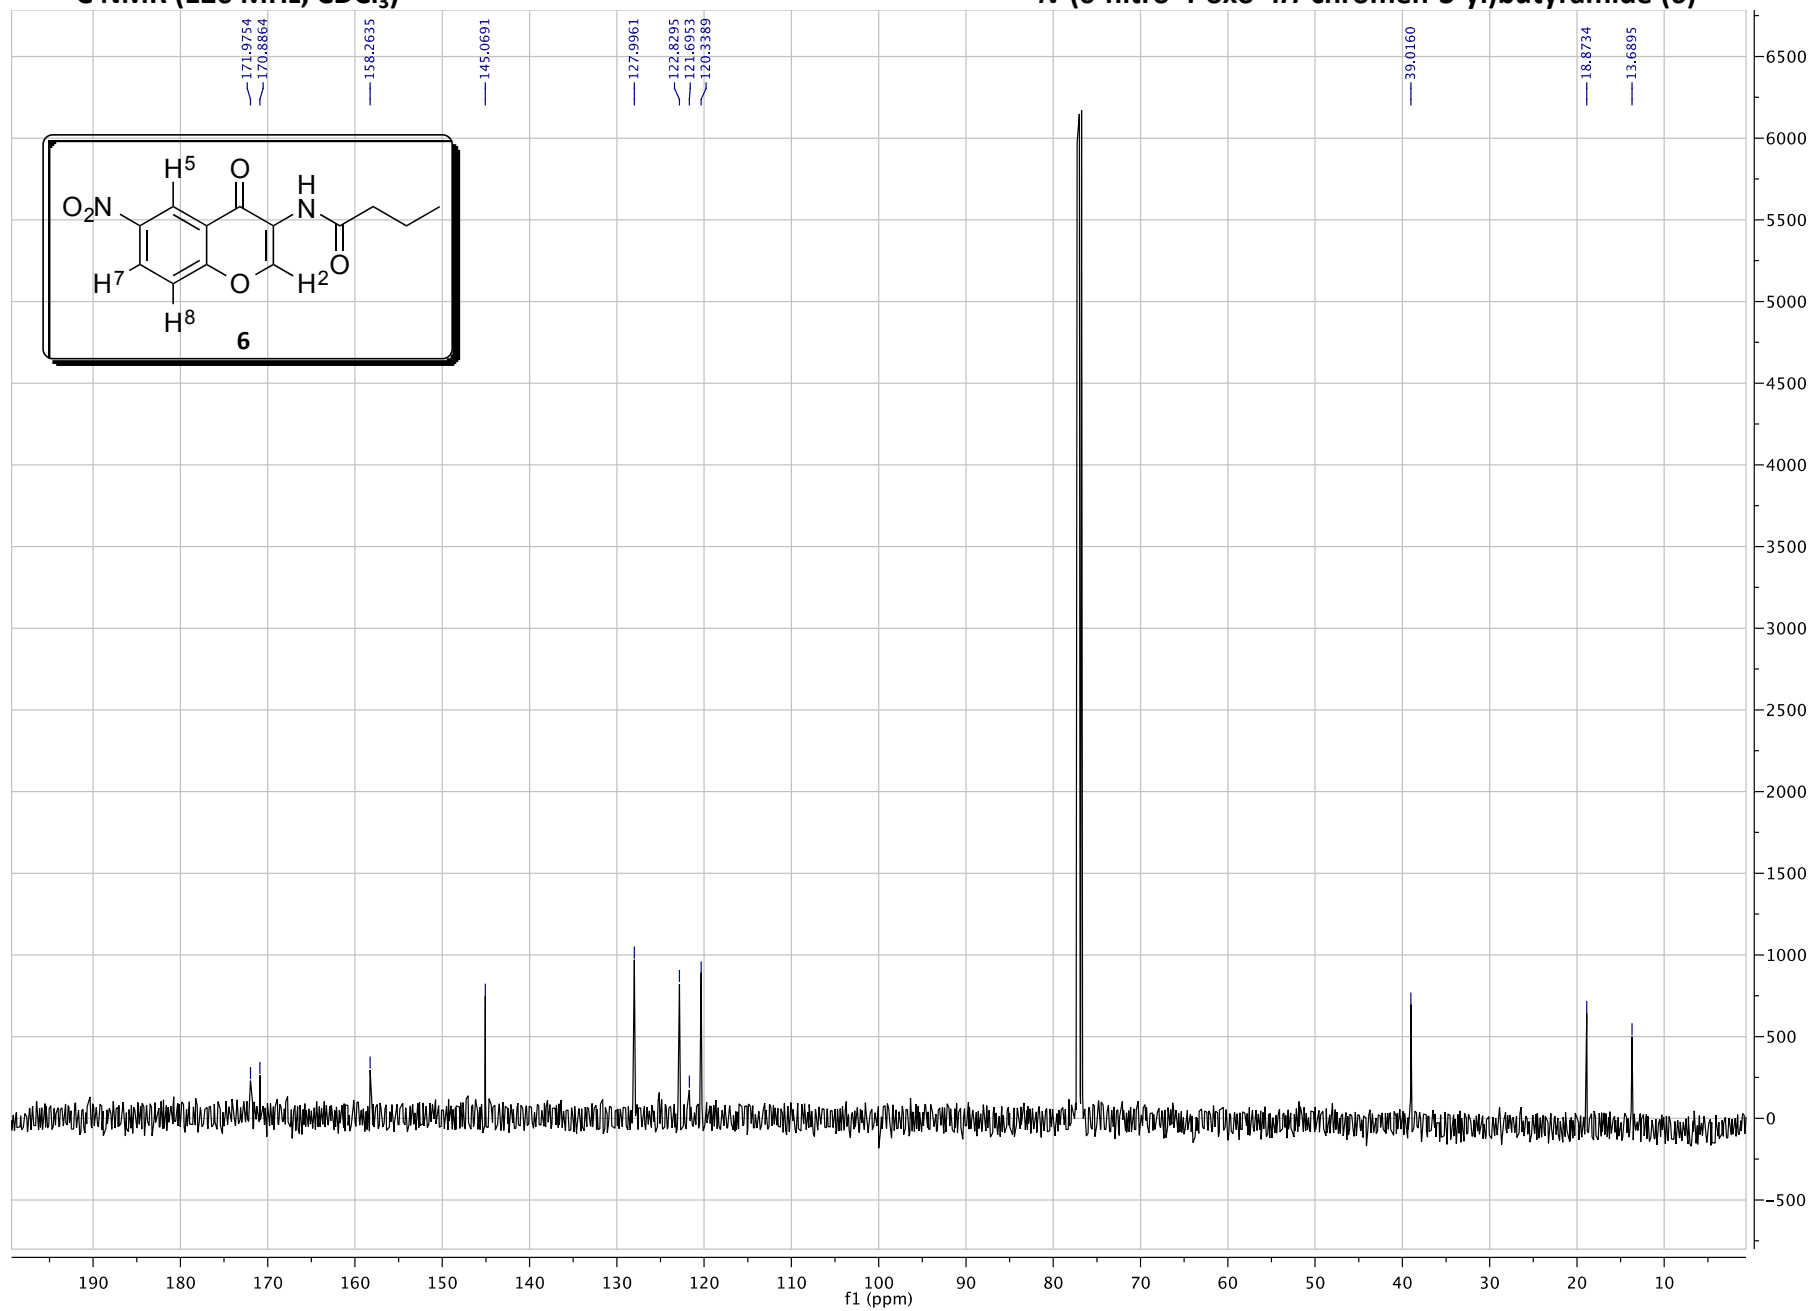

<sup>1</sup>H NMR (500 MHz, CDCl<sub>3</sub>)

*N*-(6-amino-4-oxo-4*H*-chromen-3-yl)butyramide (7)

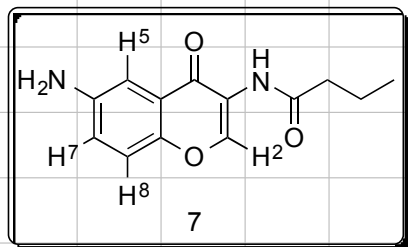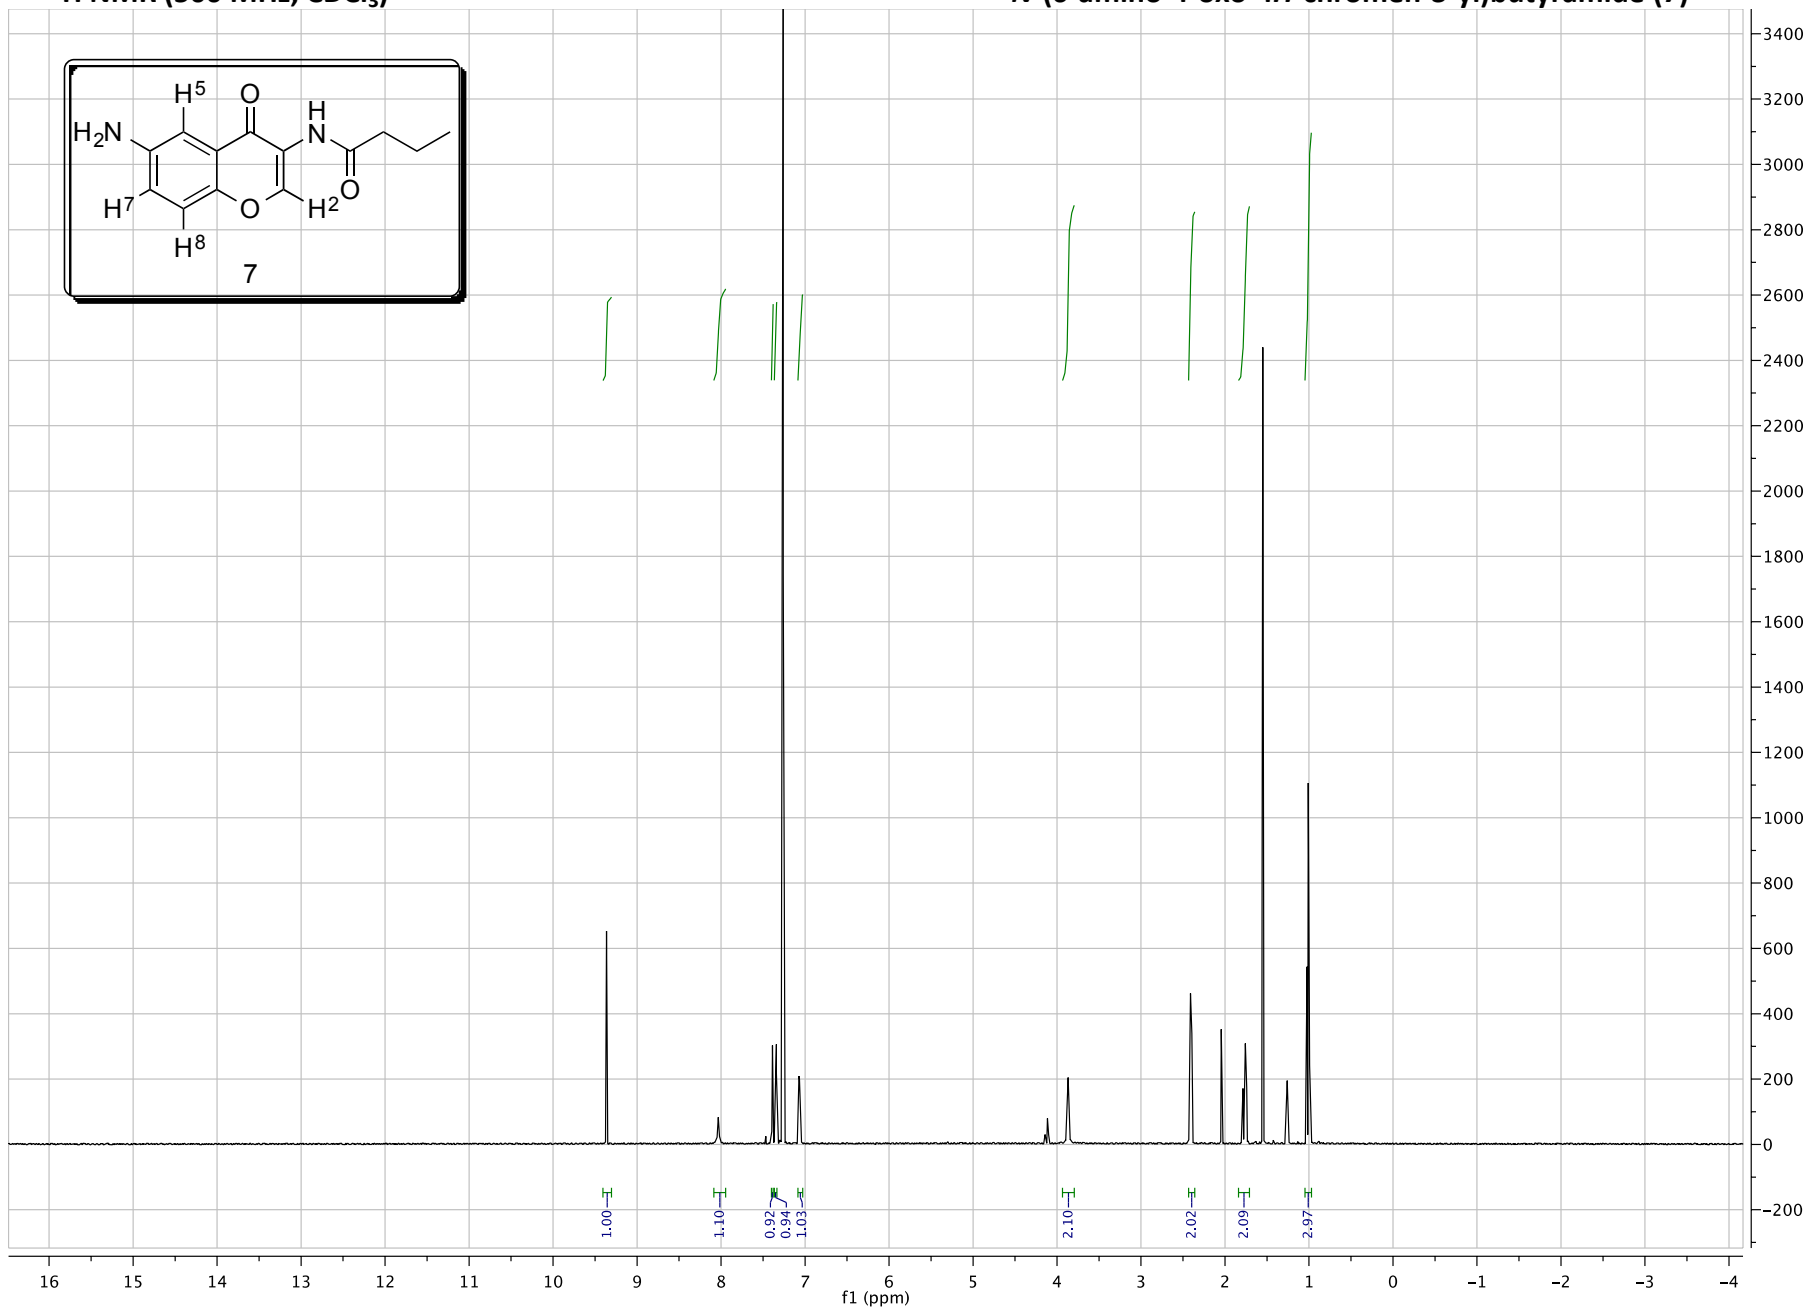

<sup>13</sup>C NMR (126 MHz, CDCl<sub>3</sub>)

*N*-(6-amino-4-oxo-4*H*-chromen-3-yl)butyramide (7)

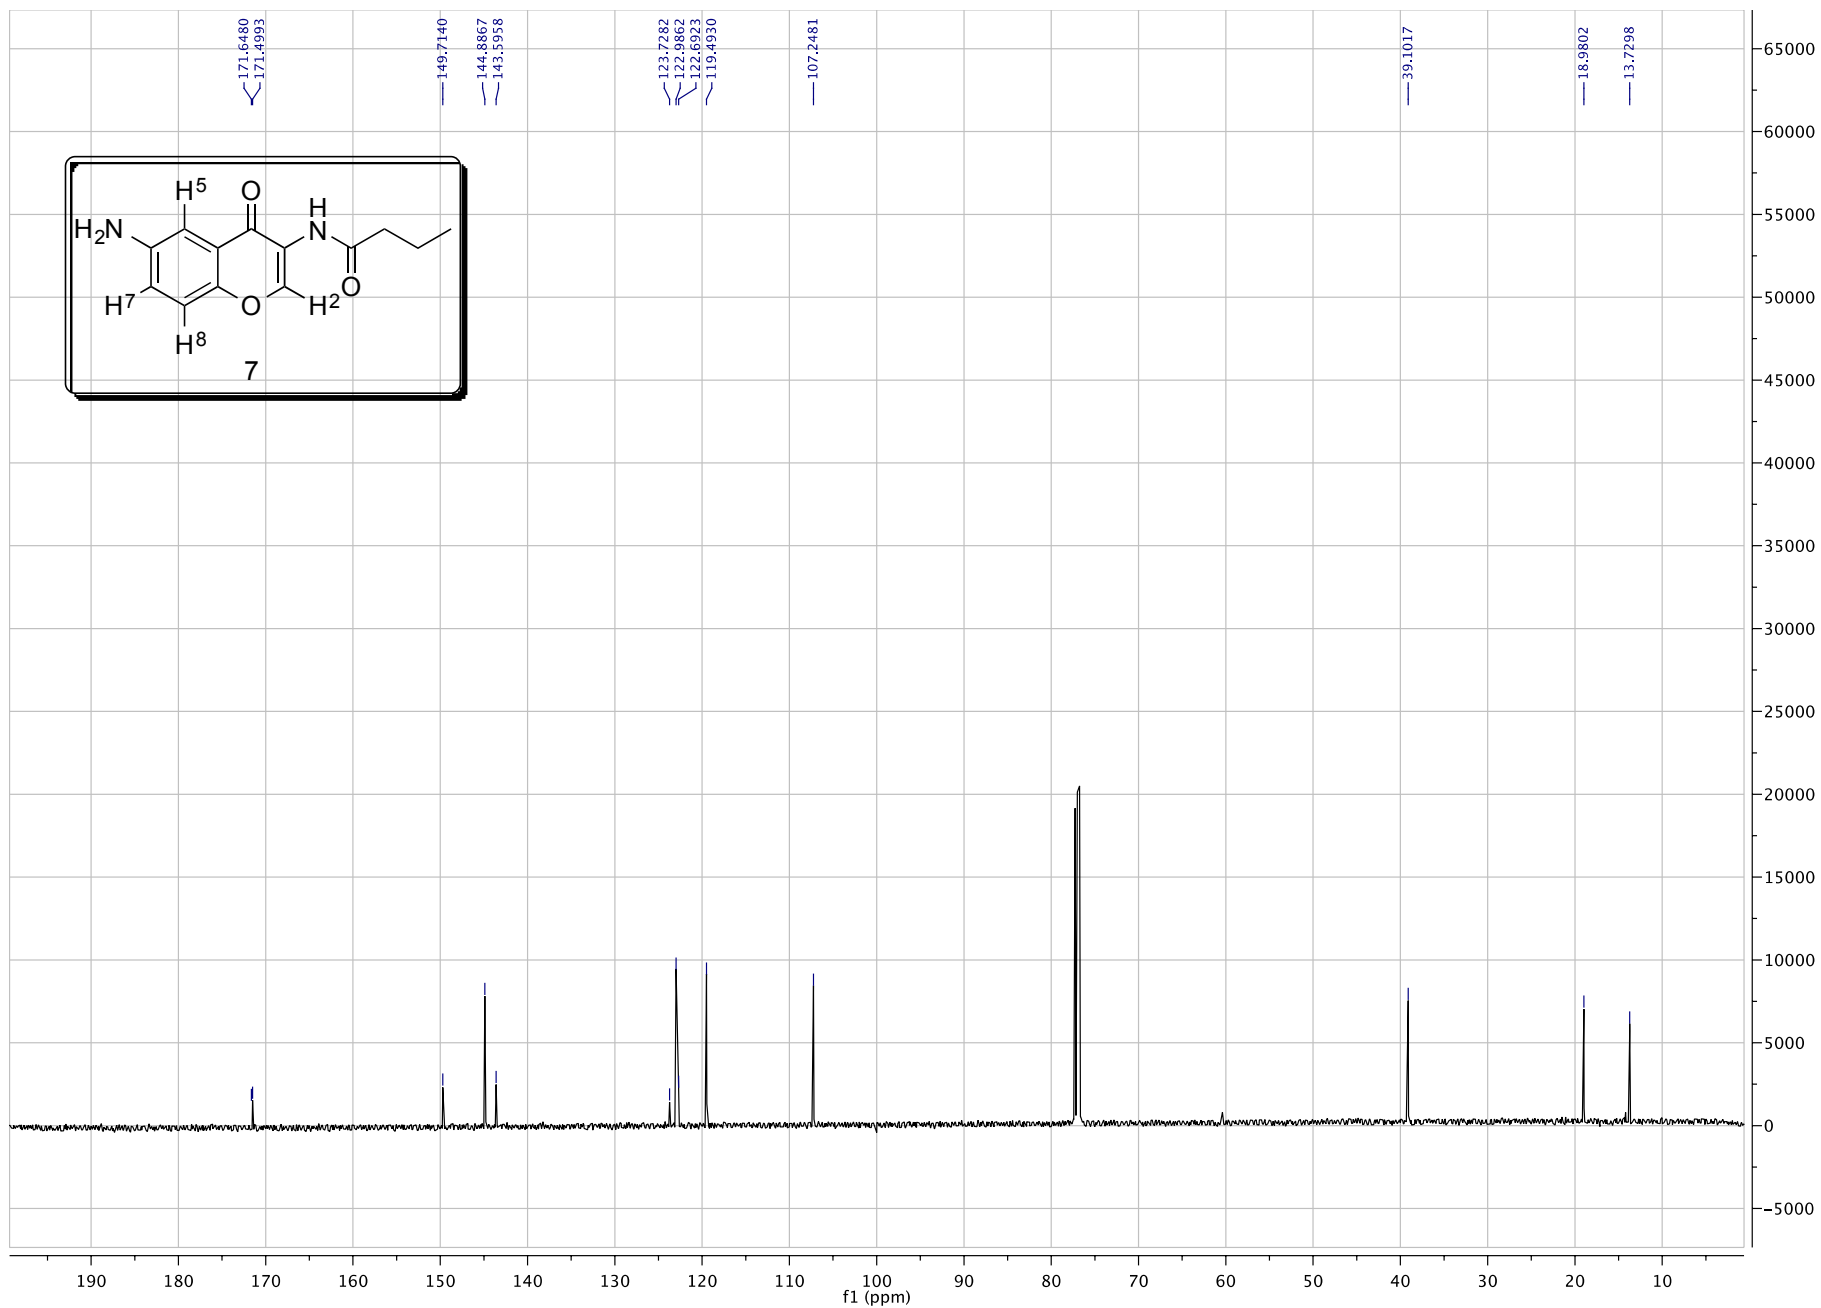

<sup>1</sup>H NMR (500 MHz, CDCl<sub>3</sub>)

*N*-(4-oxo-6-(2-oxo-2-(piperidin-1-yl)acetamido)-  
4H-chromen-3-yl)butyramide (1)

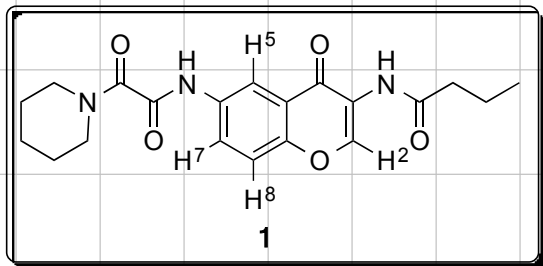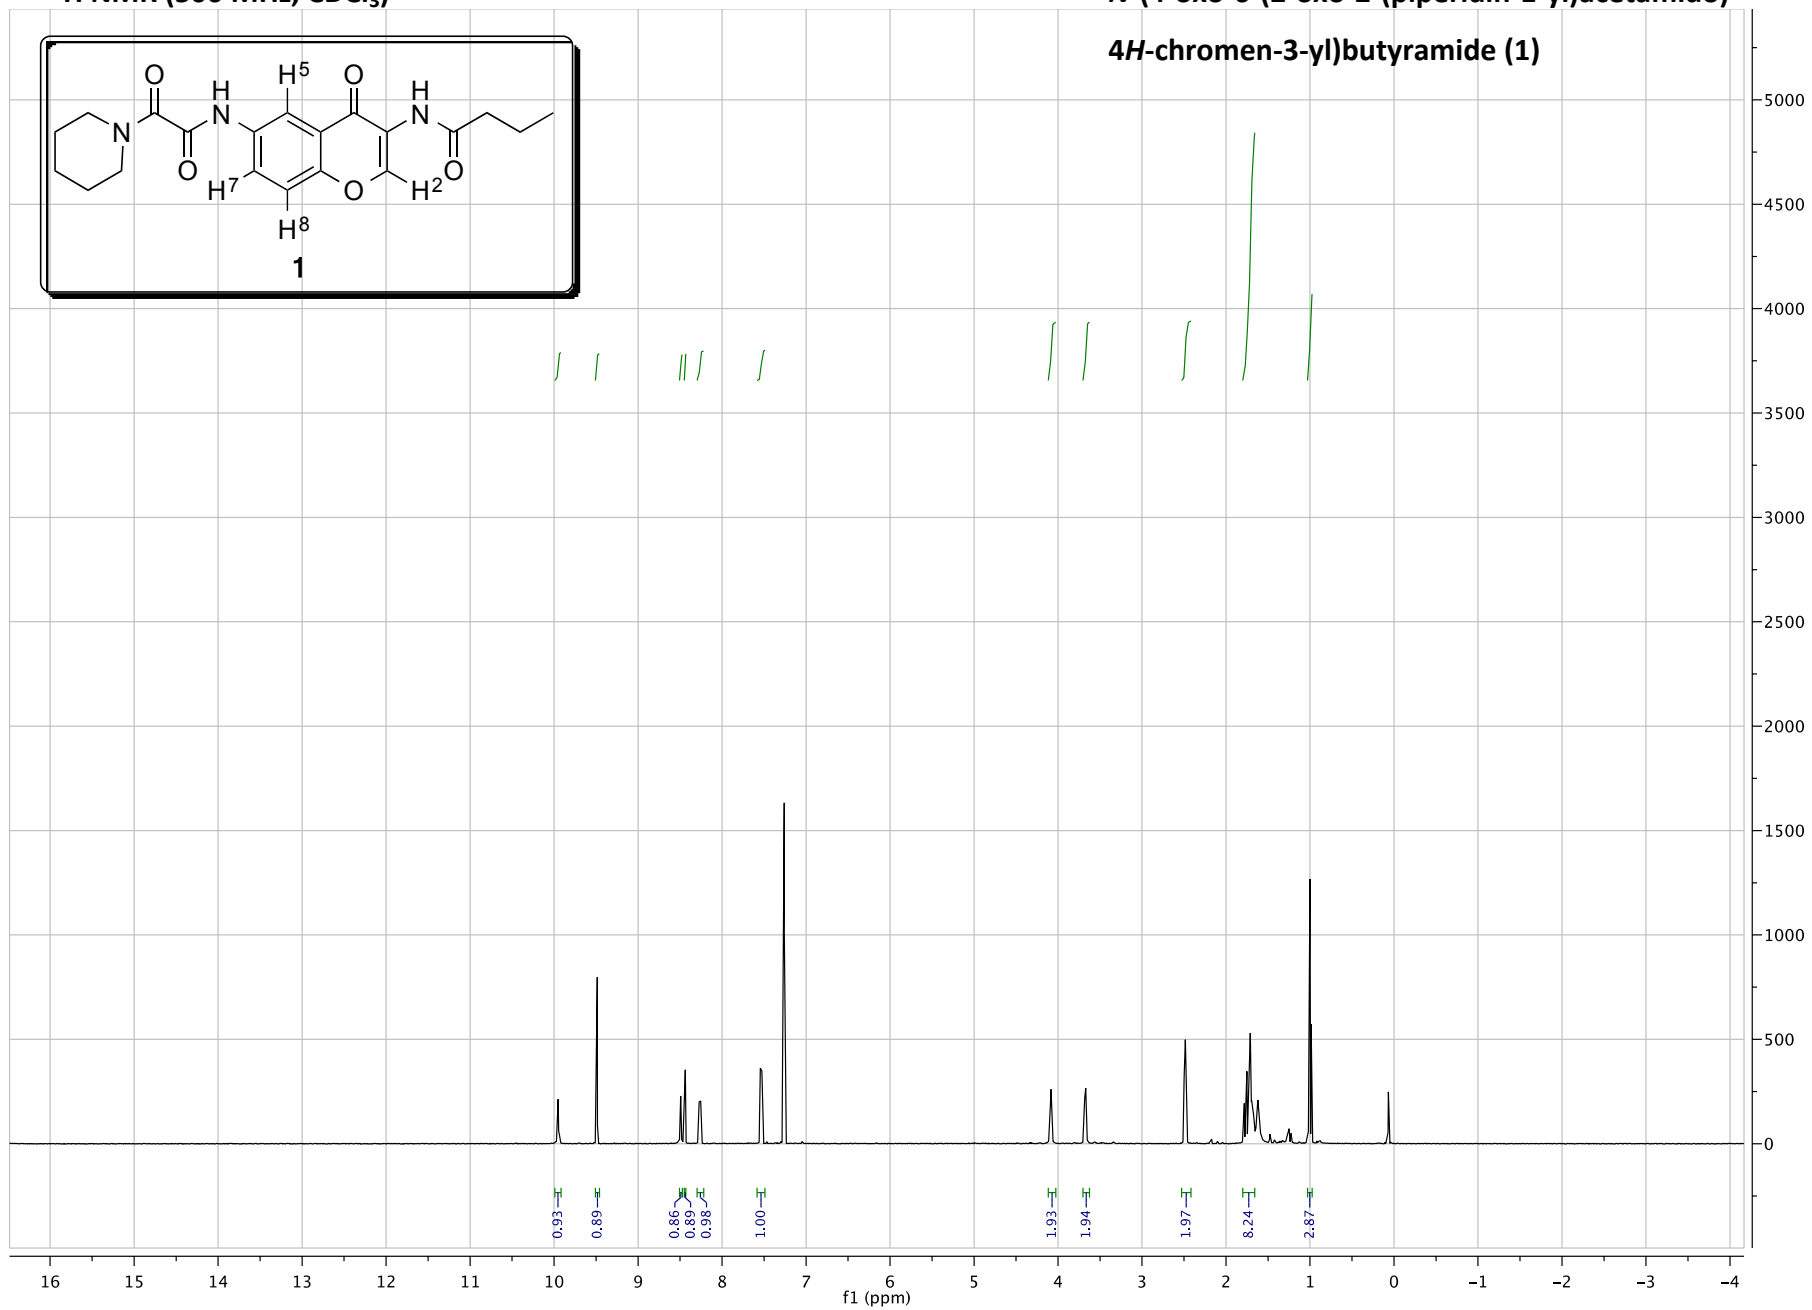

<sup>13</sup>C NMR (126 MHz, CDCl<sub>3</sub>)

*N*-(4-oxo-6-(2-oxo-2-(piperidin-1-yl)acetamido)-  
4*H*-chromen-3-yl)butyramide (1)

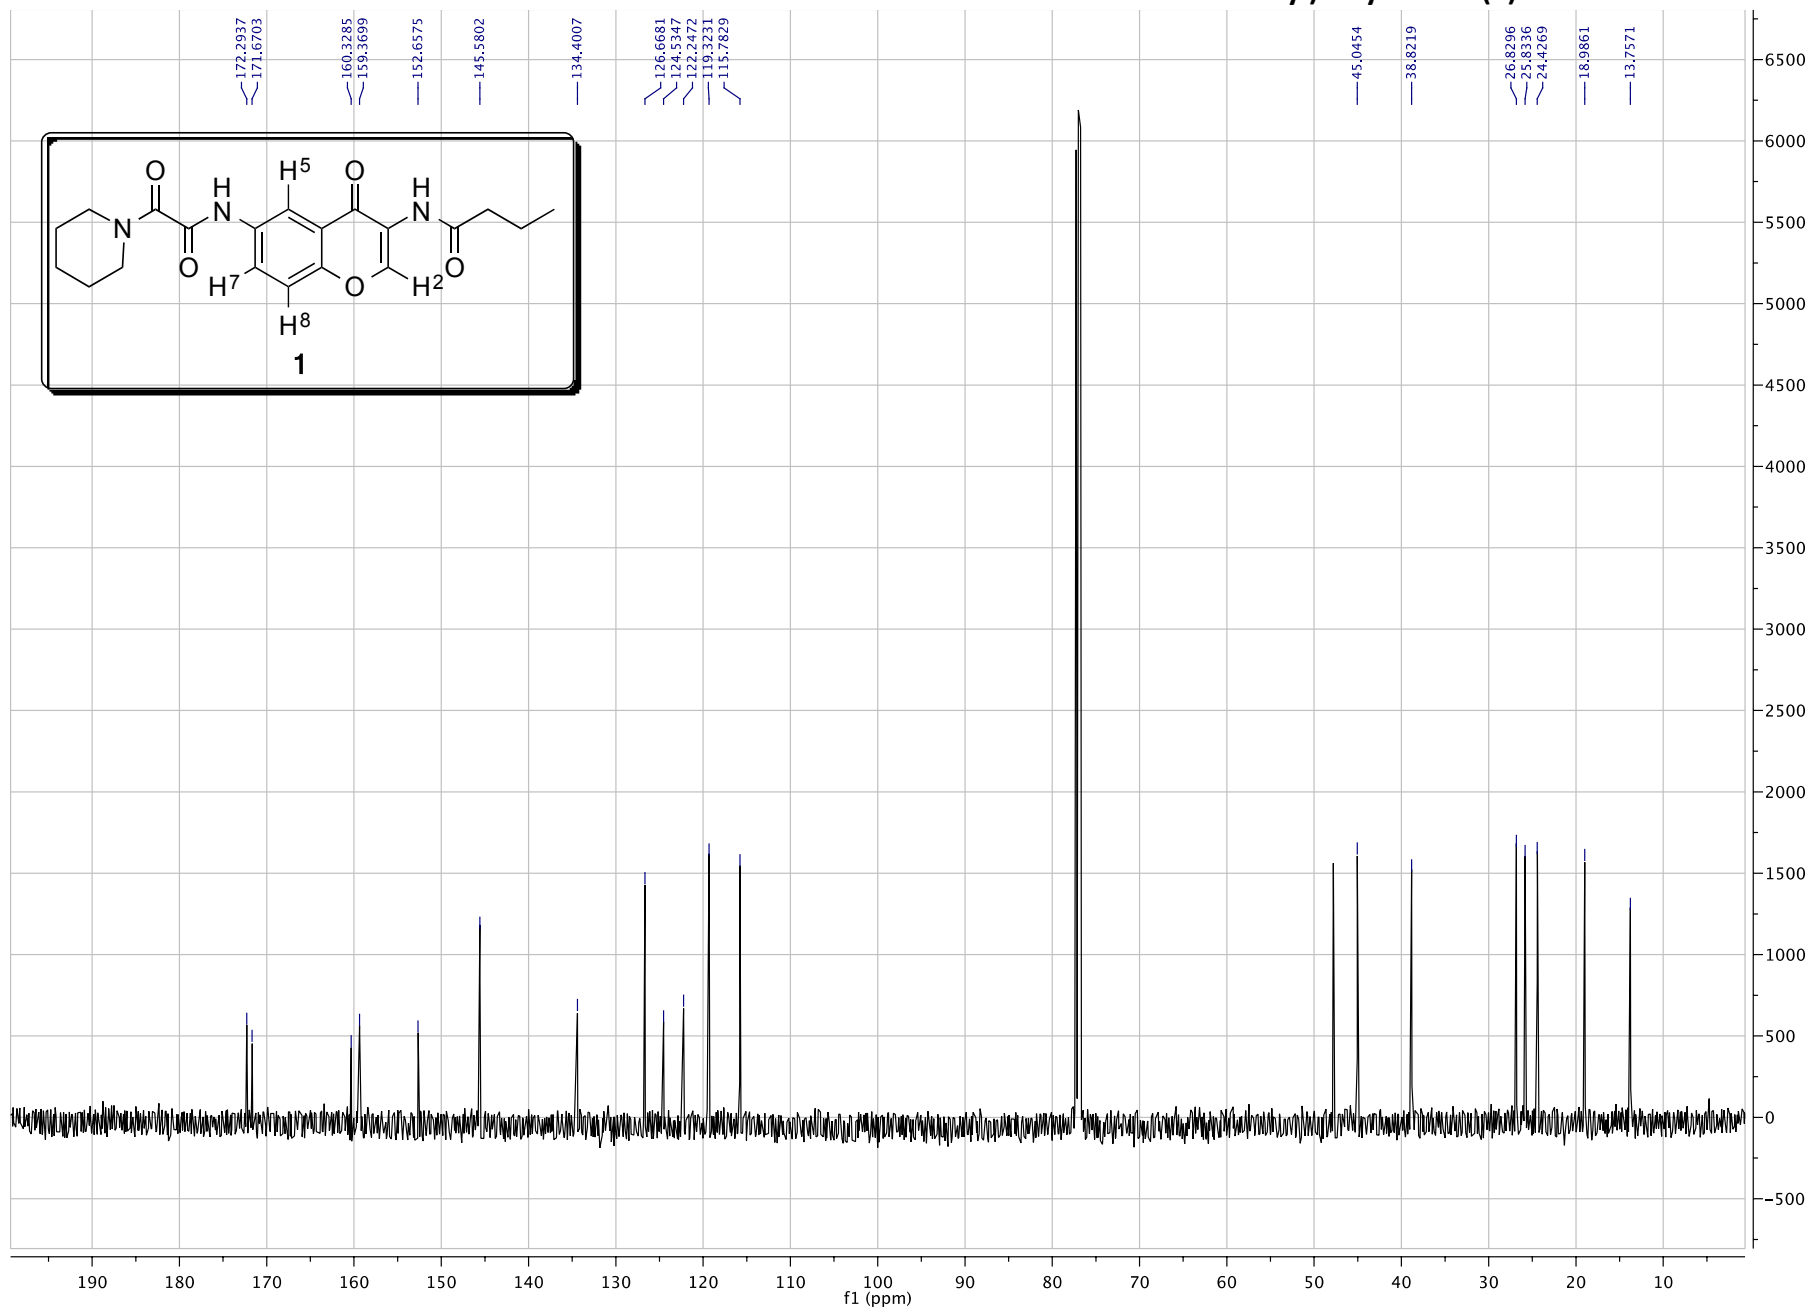



<sup>1</sup>H NMR (500 MHz, CDCl<sub>3</sub>)

*N*-(3-(2-isobutrylhydrazinecarbonyl)-4-methoxyphenyl)-2-oxo-2-(piperidin-1-yl)acetamide (**2**)

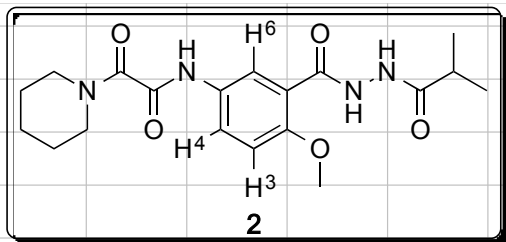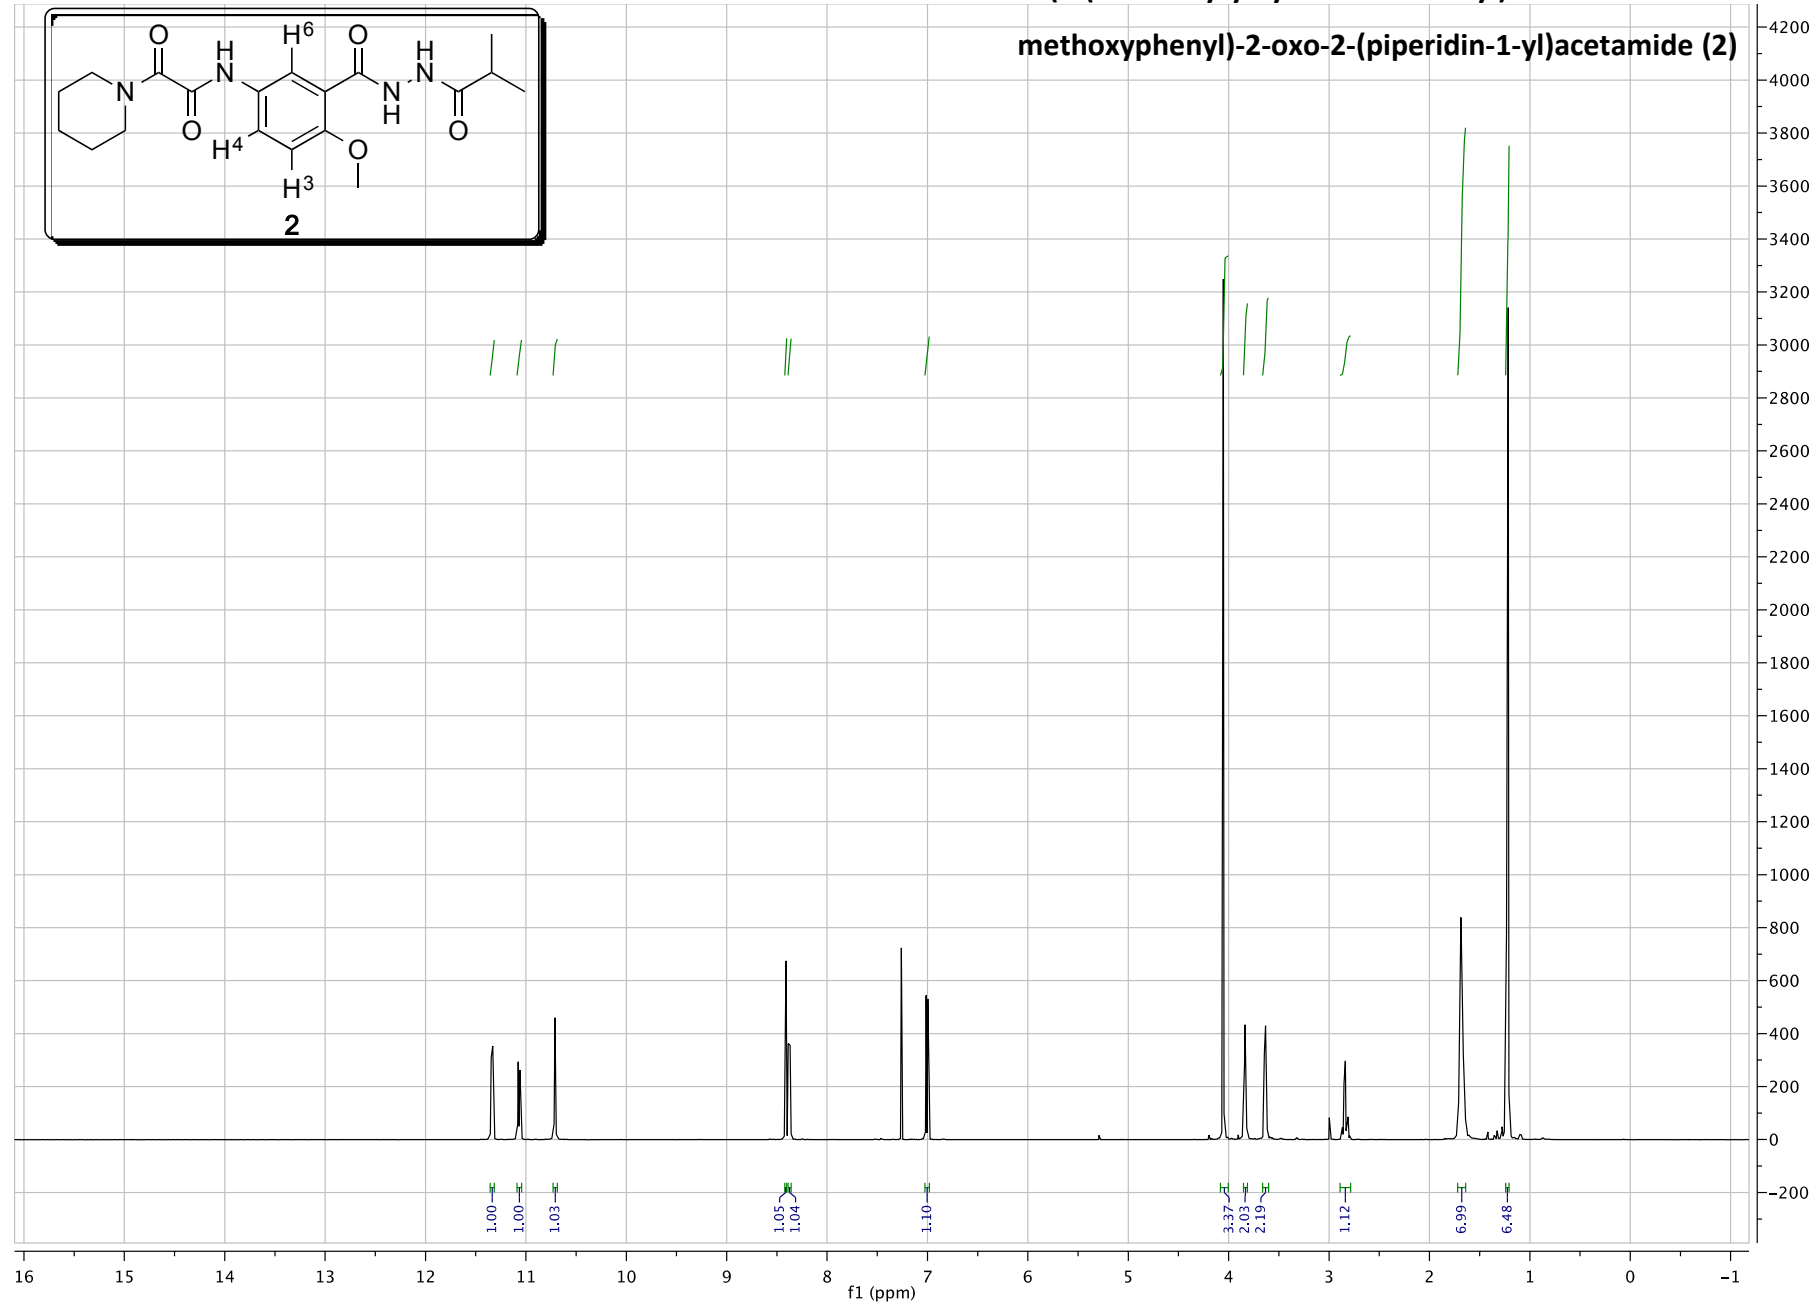

<sup>13</sup>C NMR (126 MHz, CDCl<sub>3</sub>)

*N*-(3-(2-isobutyrylhydrazinecarbonyl)-4-methoxyphenyl)-2-oxo-2-(piperidin-1-yl)acetamide (2)

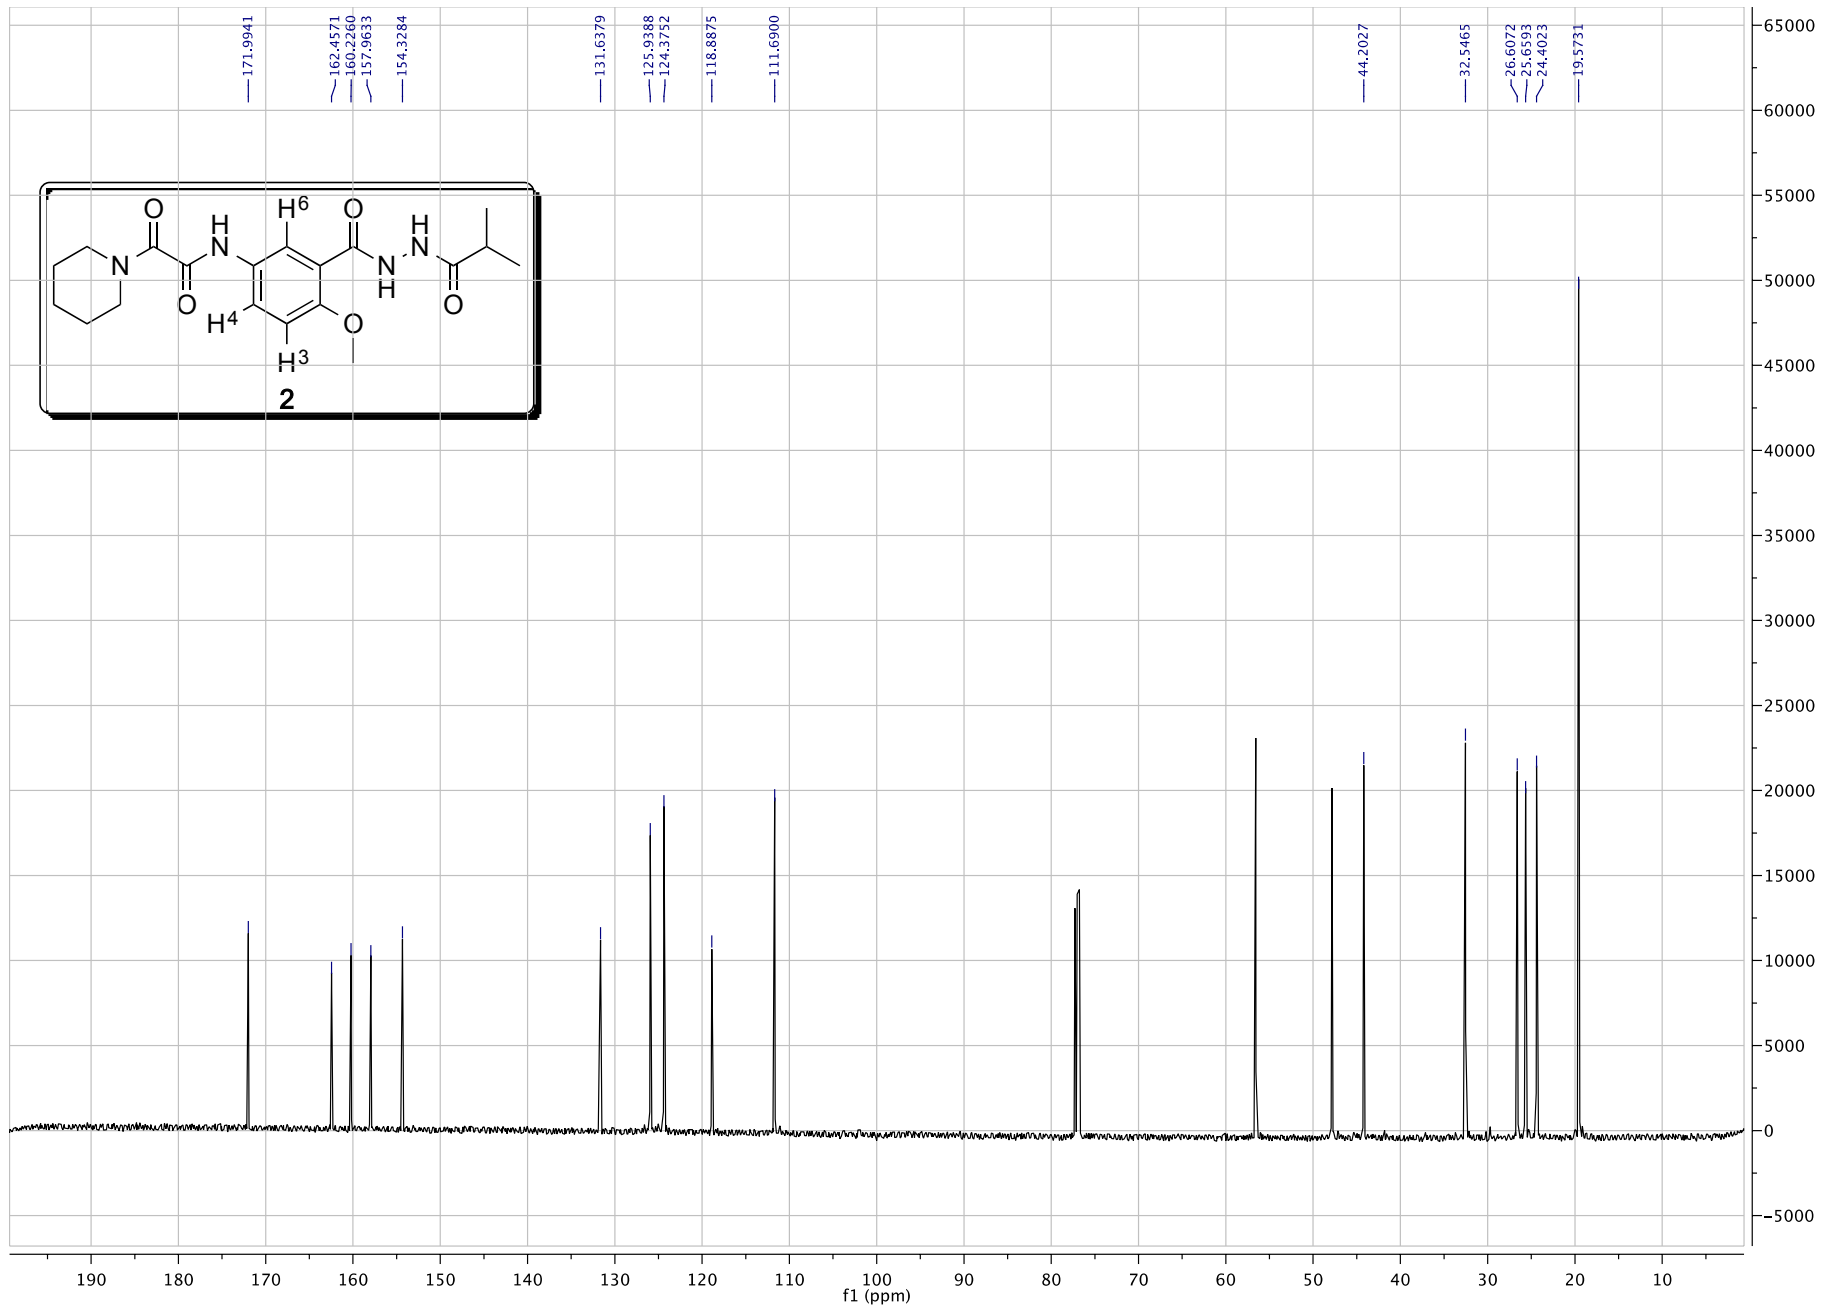

<sup>1</sup>H NMR (500 MHz, CDCl<sub>3</sub>)

*N*-(3-(2-isobutrylhydrazine-1-carbonyl)-methoxyphenyl)butyramide (2a)

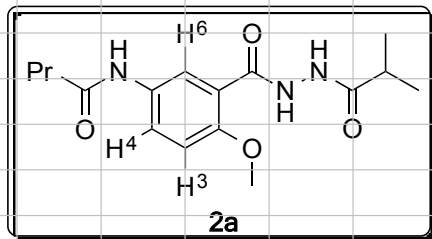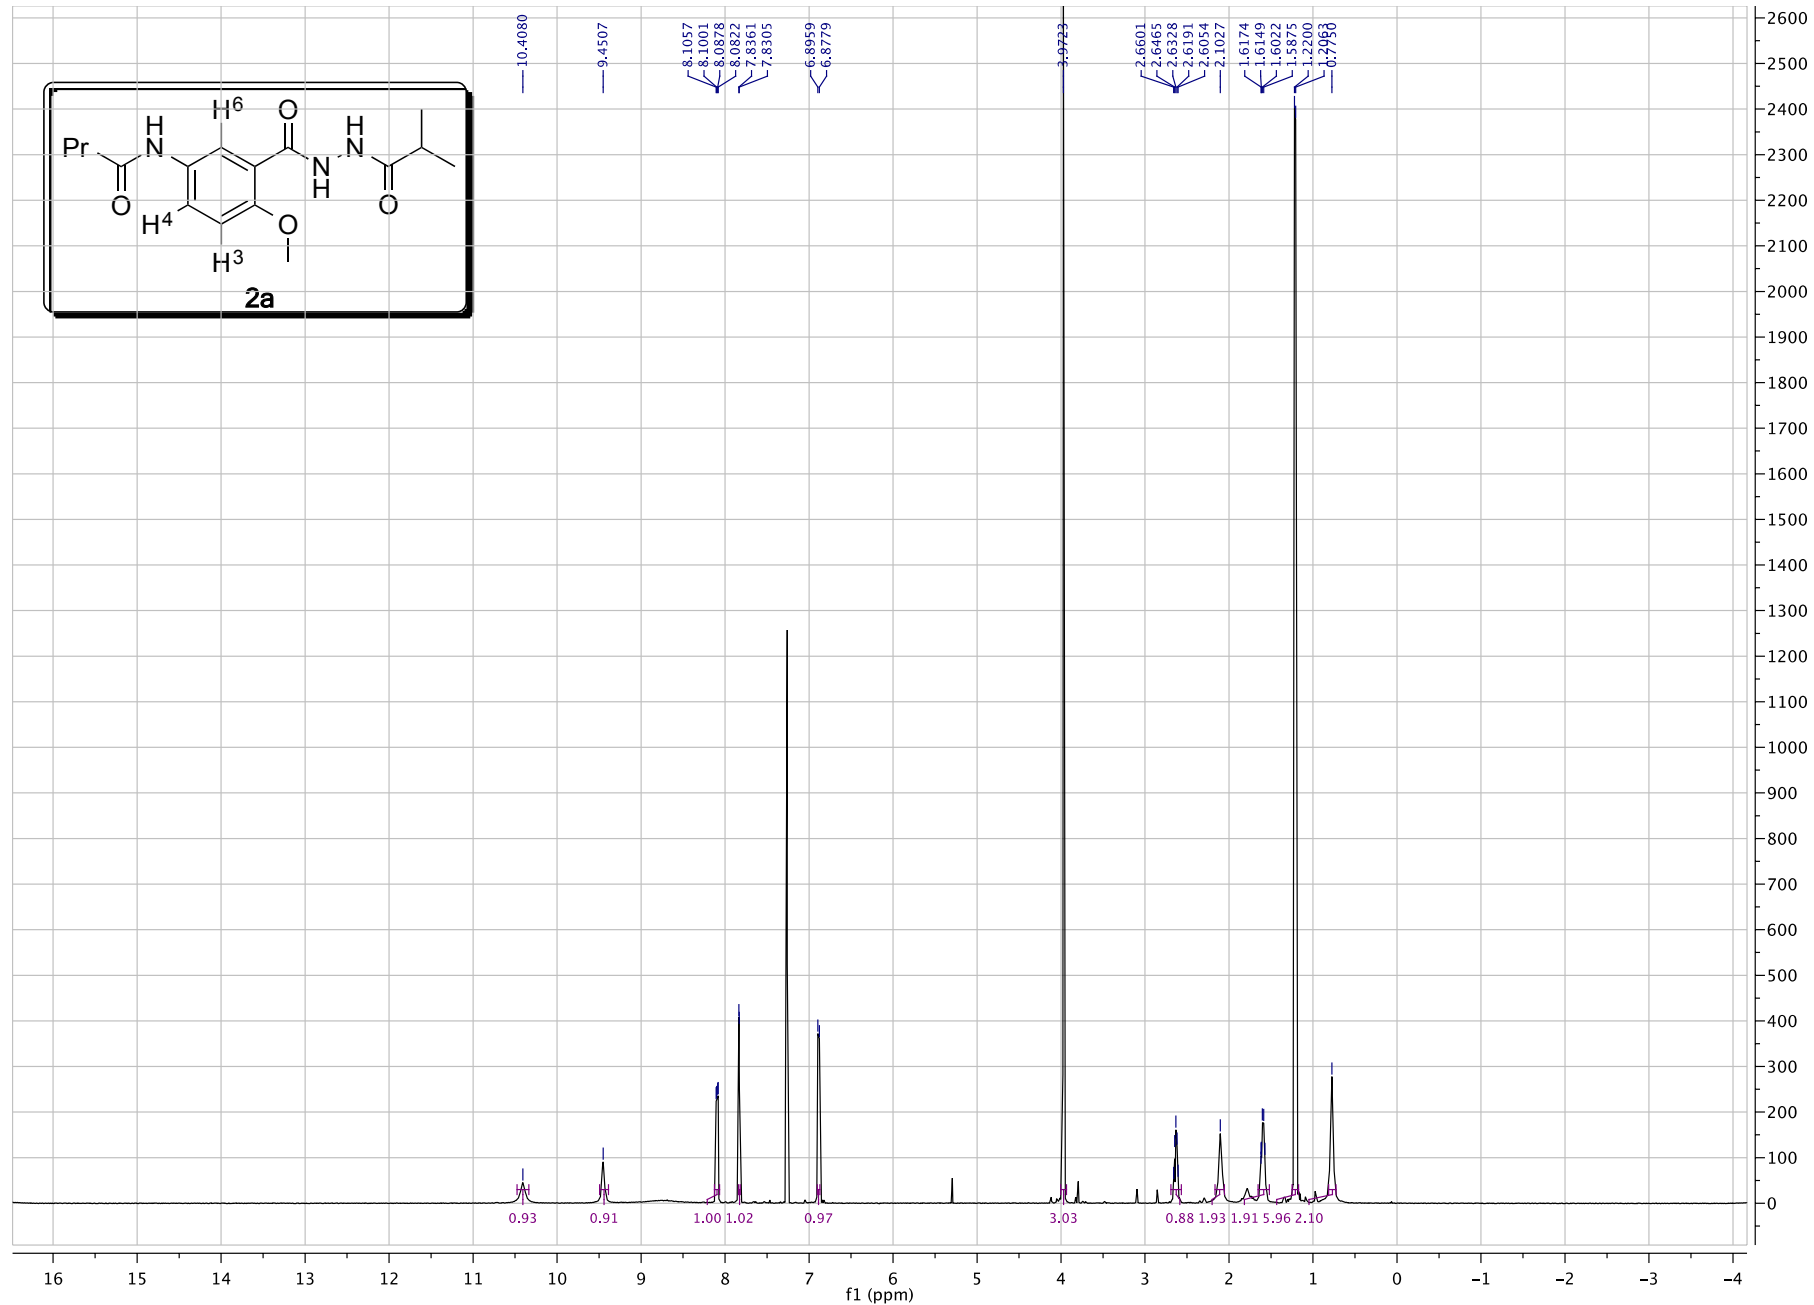

<sup>13</sup>C NMR (126 MHz, CDCl<sub>3</sub>)

*N*-(3-(2-isobutyrylhydrazine-1-carbonyl)-methoxyphenyl)butyramide (2a)

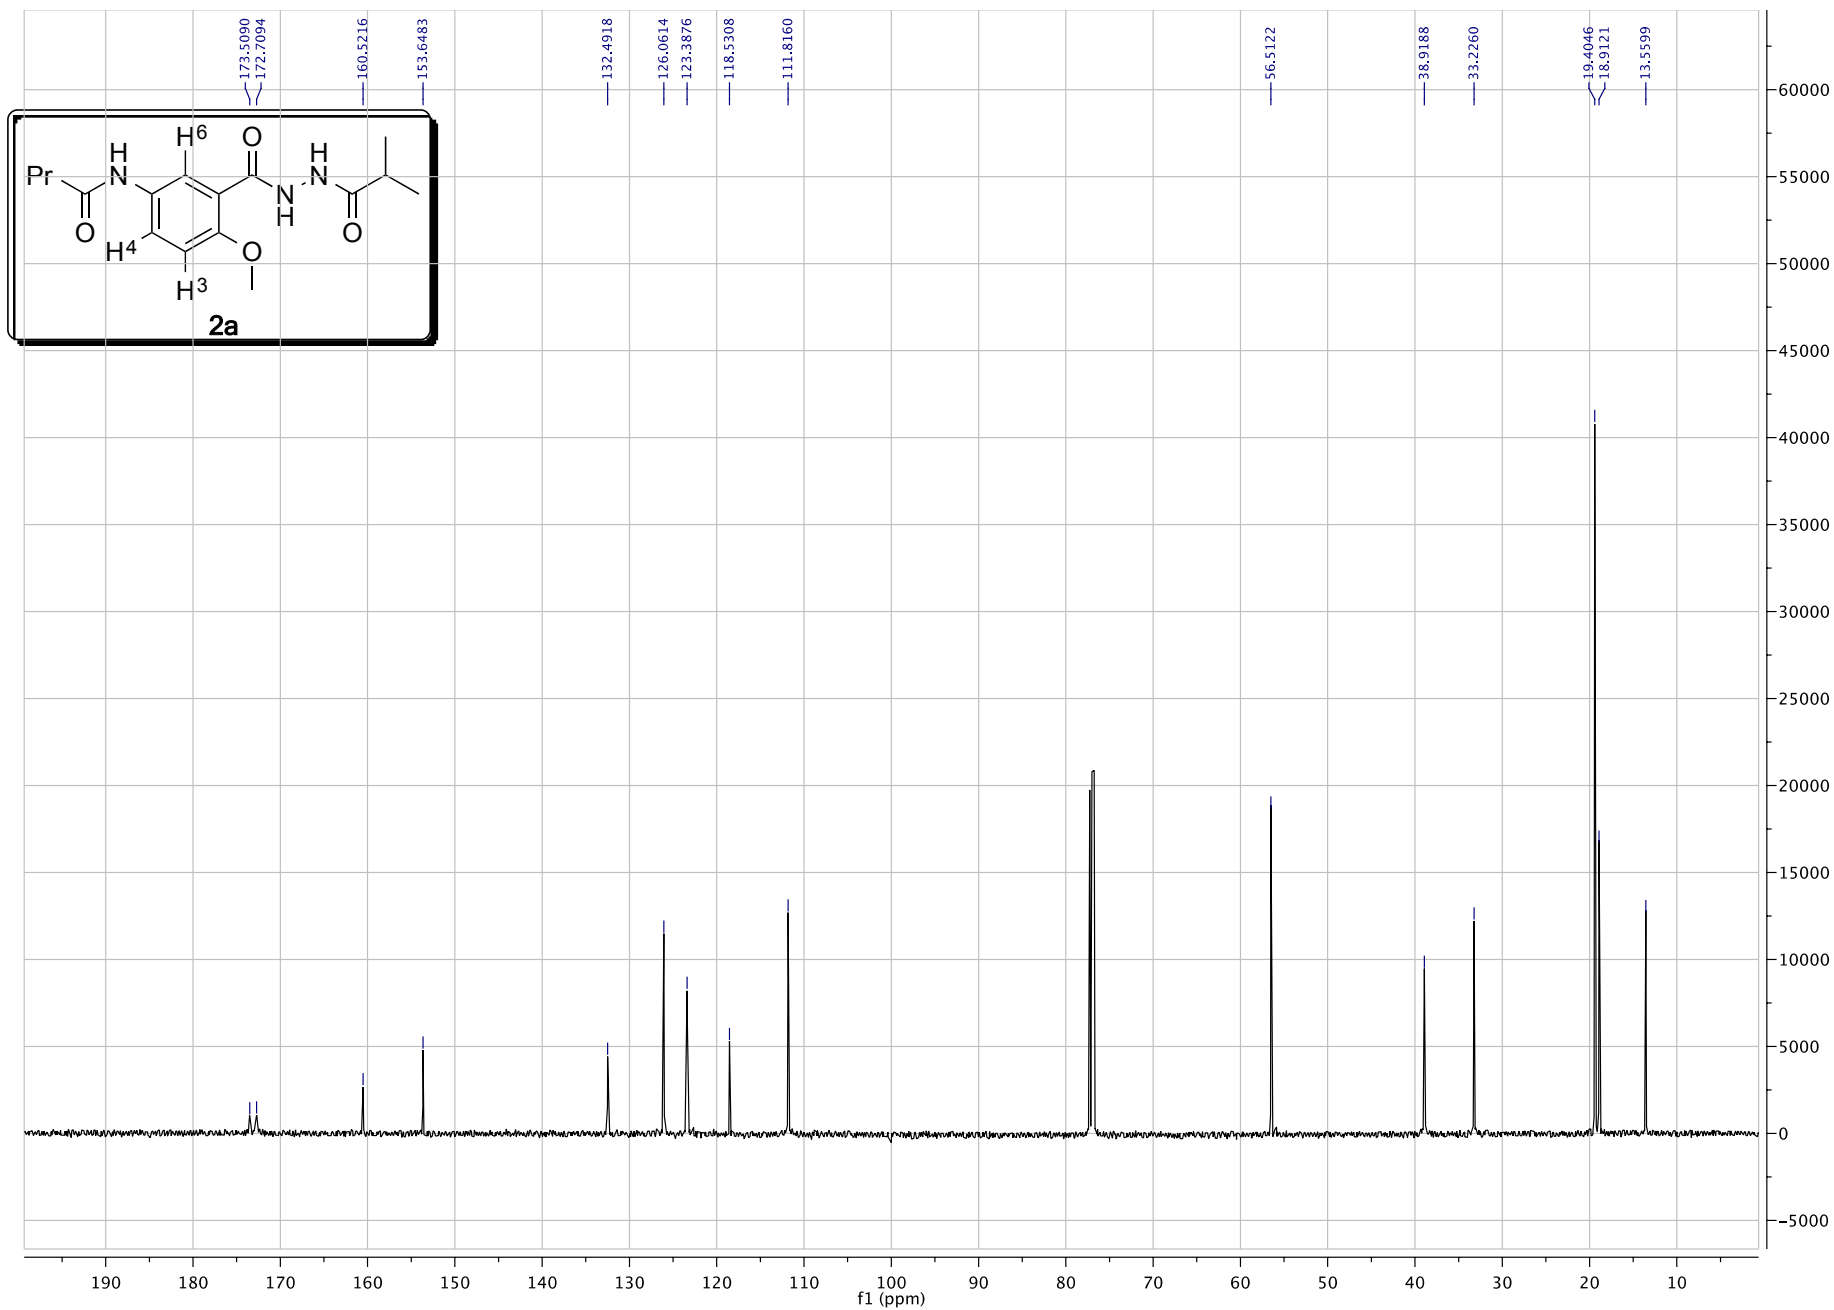

<sup>1</sup>H NMR (500 MHz, CDCl<sub>3</sub>)

(S)-N-((S)-1-(butylamino)-3-methyl-1-oxobutan-2-yl)-2-((S)-2-isobutyramido-3-phenylpropanamido)-4-methylpentanamide

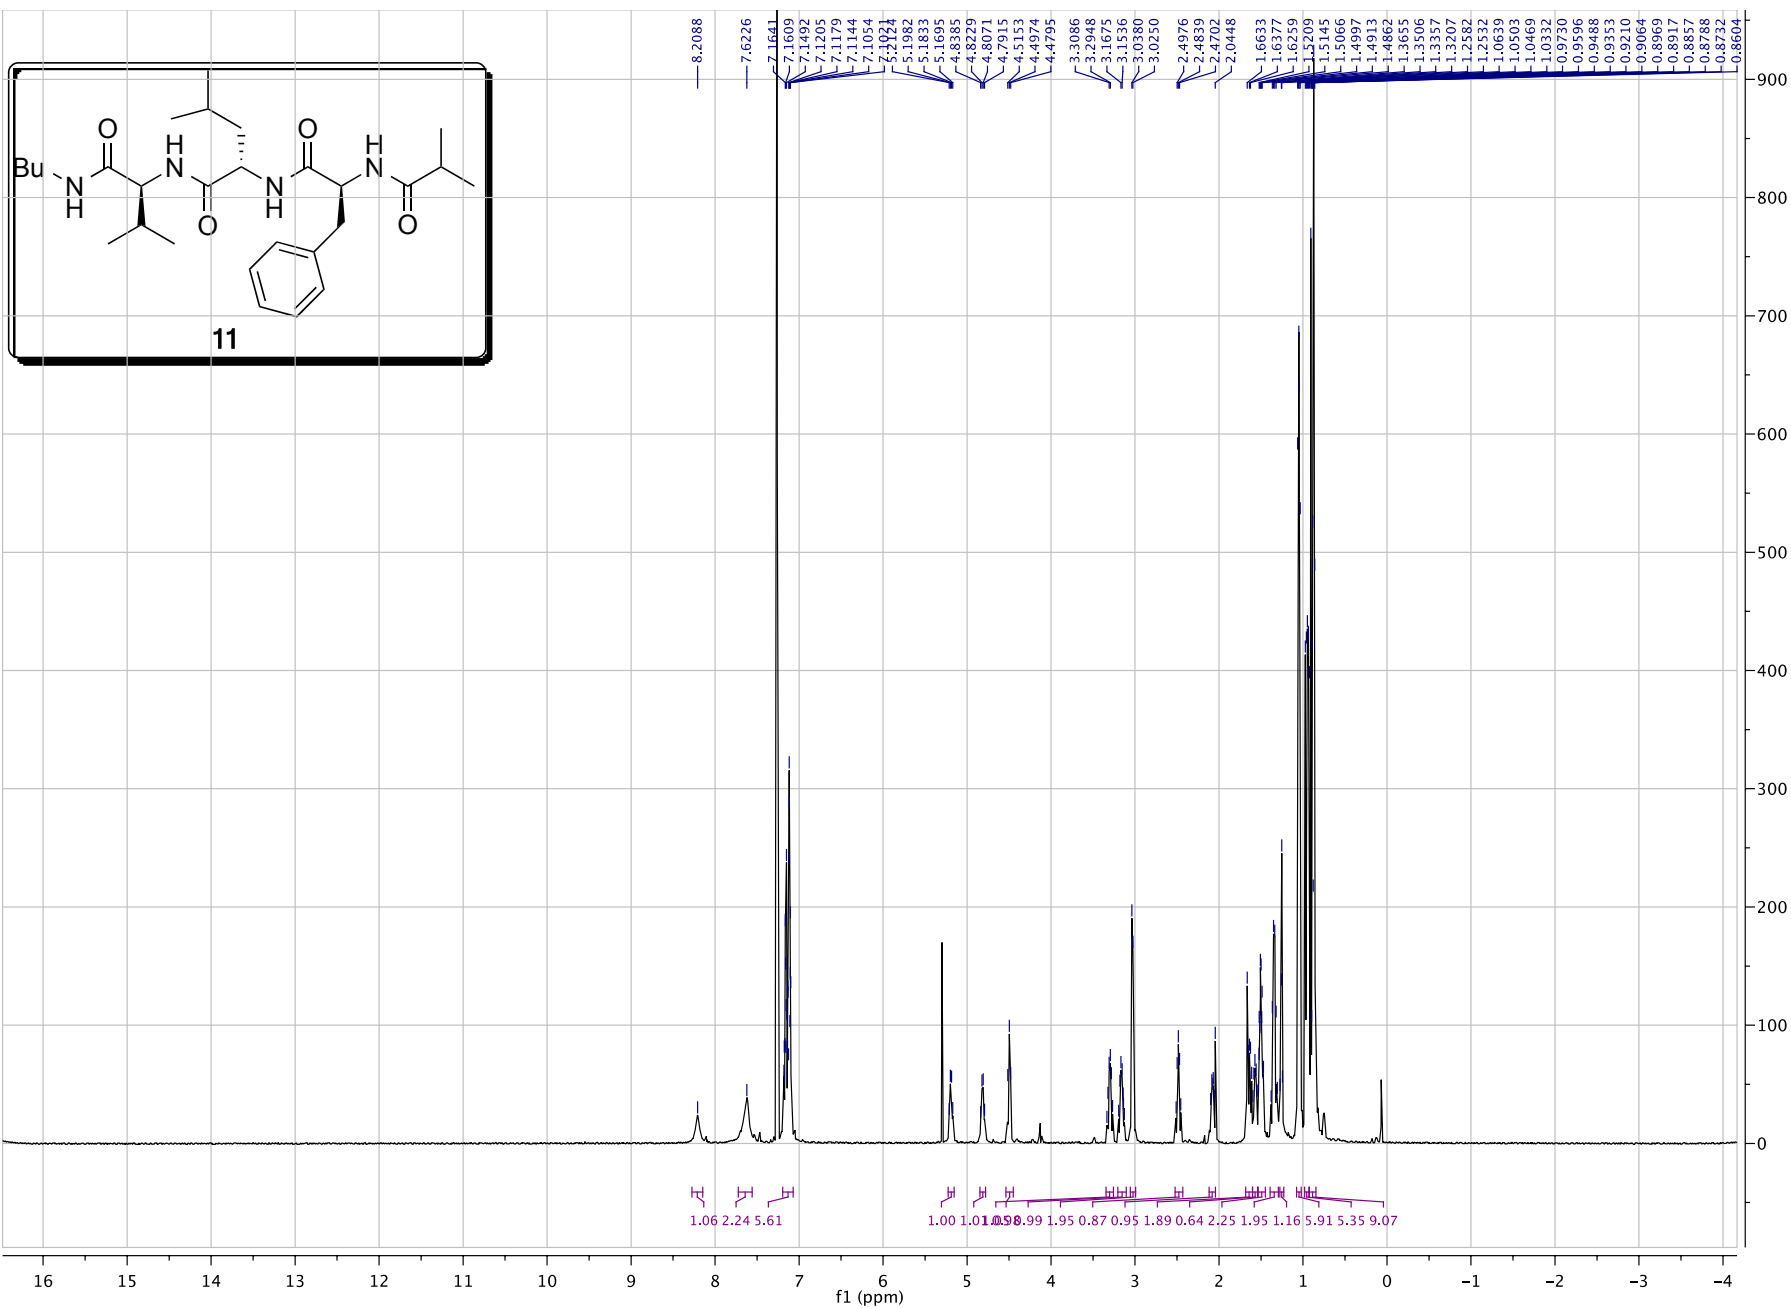

<sup>13</sup>C NMR (126 MHz, CDCl<sub>3</sub>)

*(S)*-*N*-((*S*)-1-(butylamino)-3-methyl-1-oxobutan-2-yl)-2-((*S*)-2-isobutyramido-3-phenylpropanamido)-4-methylpentanamide

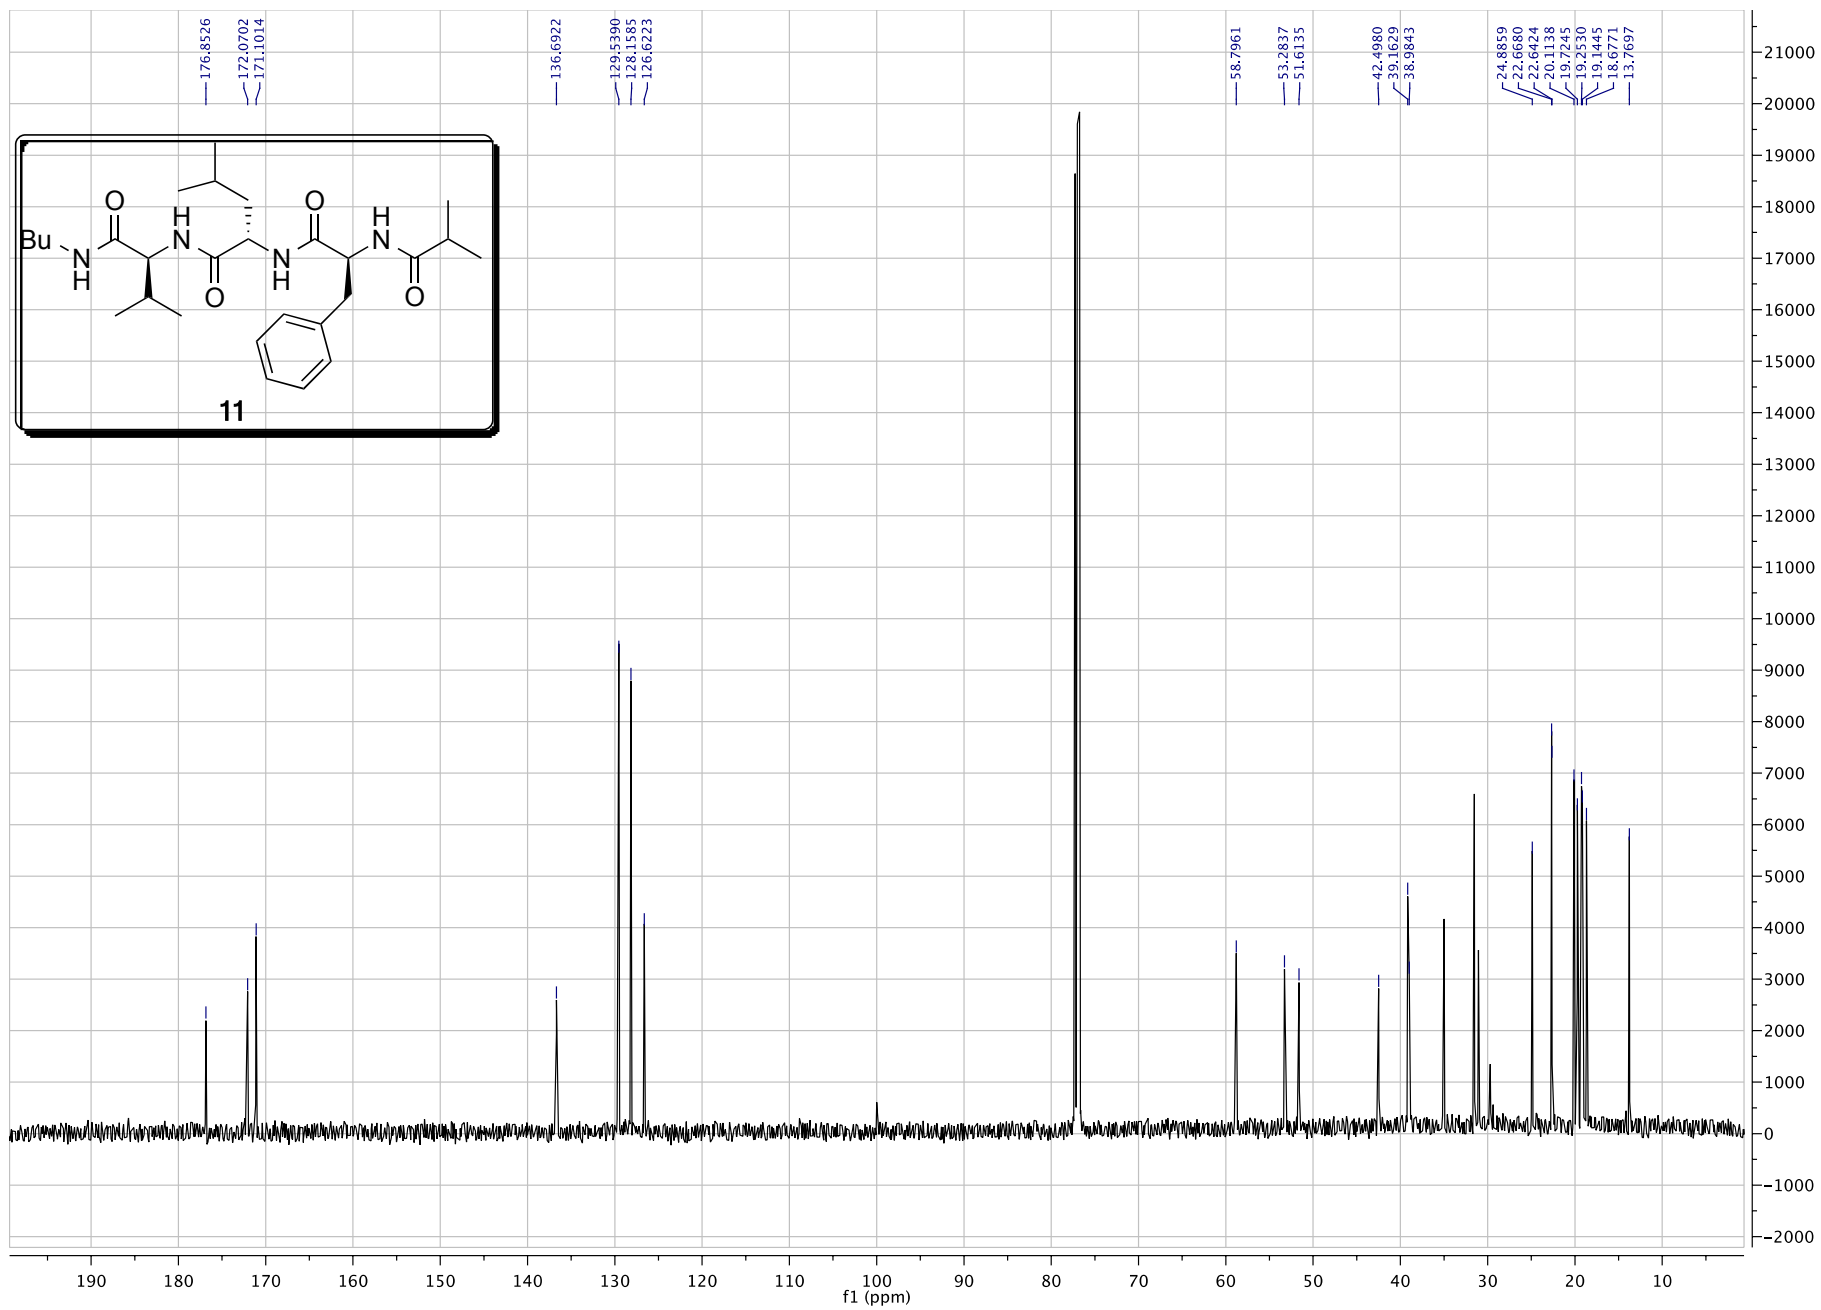

Supplement: c5ob00886g2.pdf [file c5ob00886g2.pdf]
